# Supplementary material for: Data on eleven sesquiterpenoids from the cultured mycelia of Ganoderma capense
Source: PubMed Central journal article supplement (PMC5413196; doi:10.1016/j.dib.2017.04.012), 2017-04-19
Supplement: mmc2.pdf [file mmc2.pdf]

**Figure S1.**  $^1\text{H}$  NMR spectrum of compound **1** in  $\text{CDCl}_3$

e635  $^1\text{H}$ NMR in  $\text{CDCl}_3$  at 400MHz Bruker AVANCEIII 400

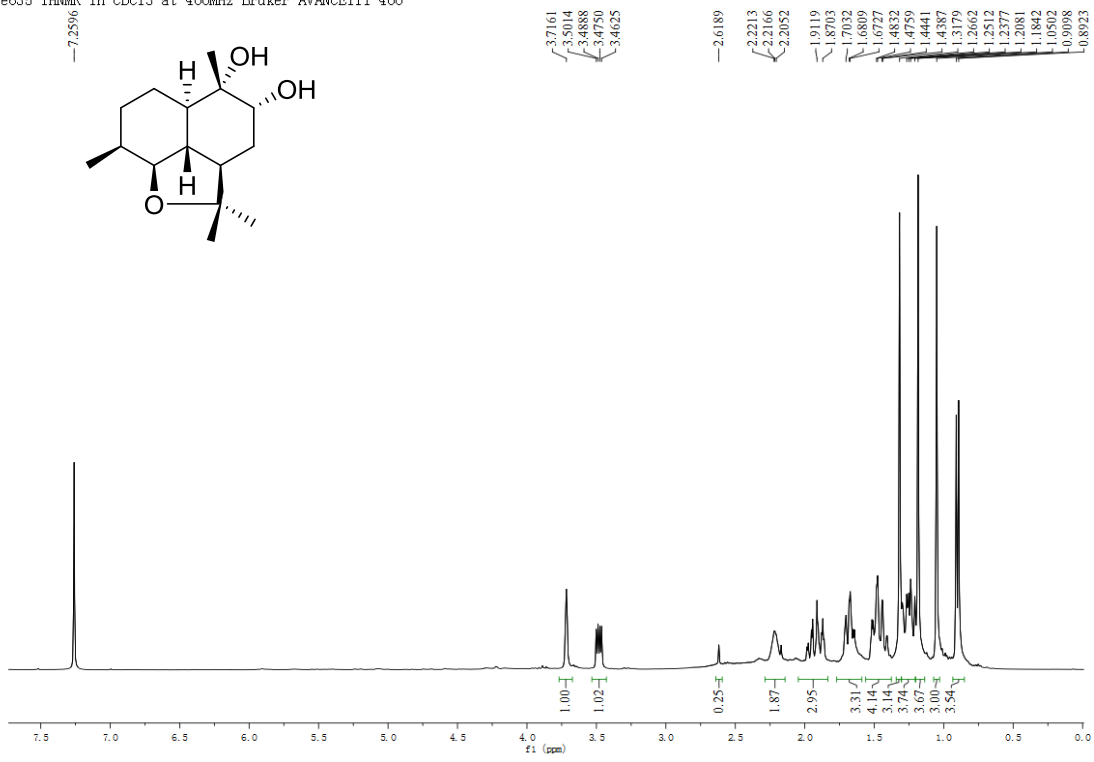

**Figure S2.**  $^{13}\text{C}$  NMR spectrum of compound **1** in  $\text{CDCl}_3$

e635 in  $\text{CDCl}_3$  at 100MHz Bruker AVANCEIII 400

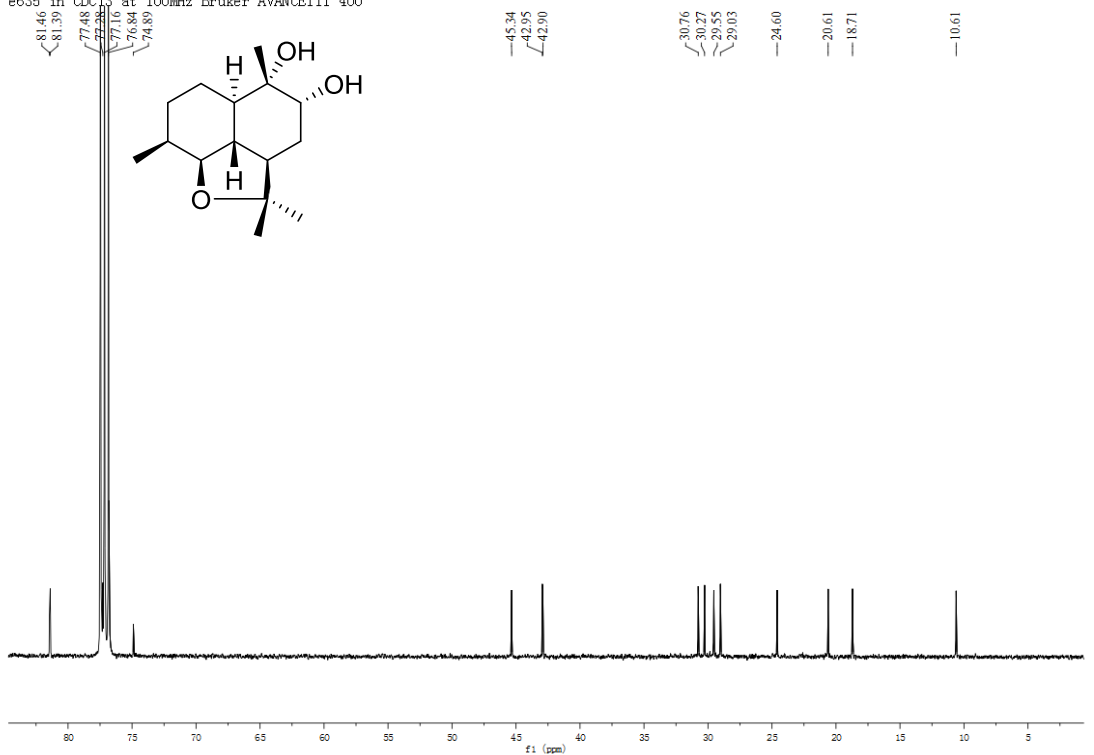

**Figure S2-2.** Enlarge  $^{13}\text{C}$  NMR spectrum of compound **1** in  $\text{CDCl}_3$

e635 in  $\text{CDCl}_3$  at 100MHz Bruker AVANCEIII 400

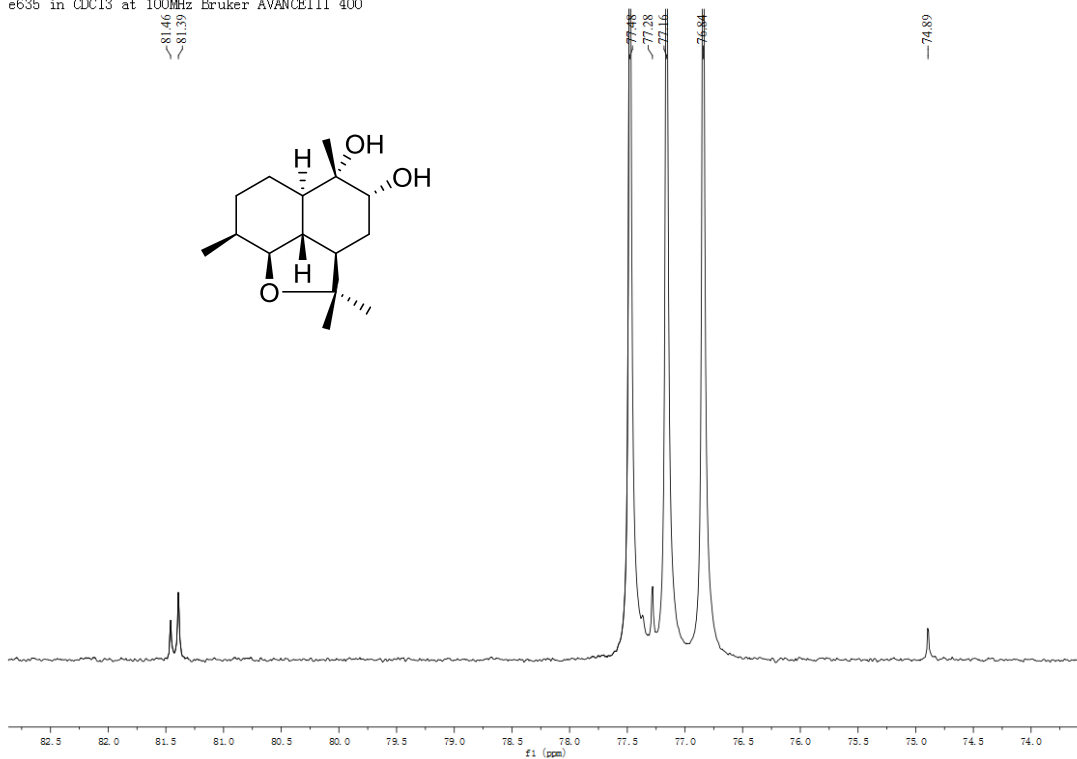

**Figure S3.** DEPT spectrum of compound **1** in  $\text{CDCl}_3$

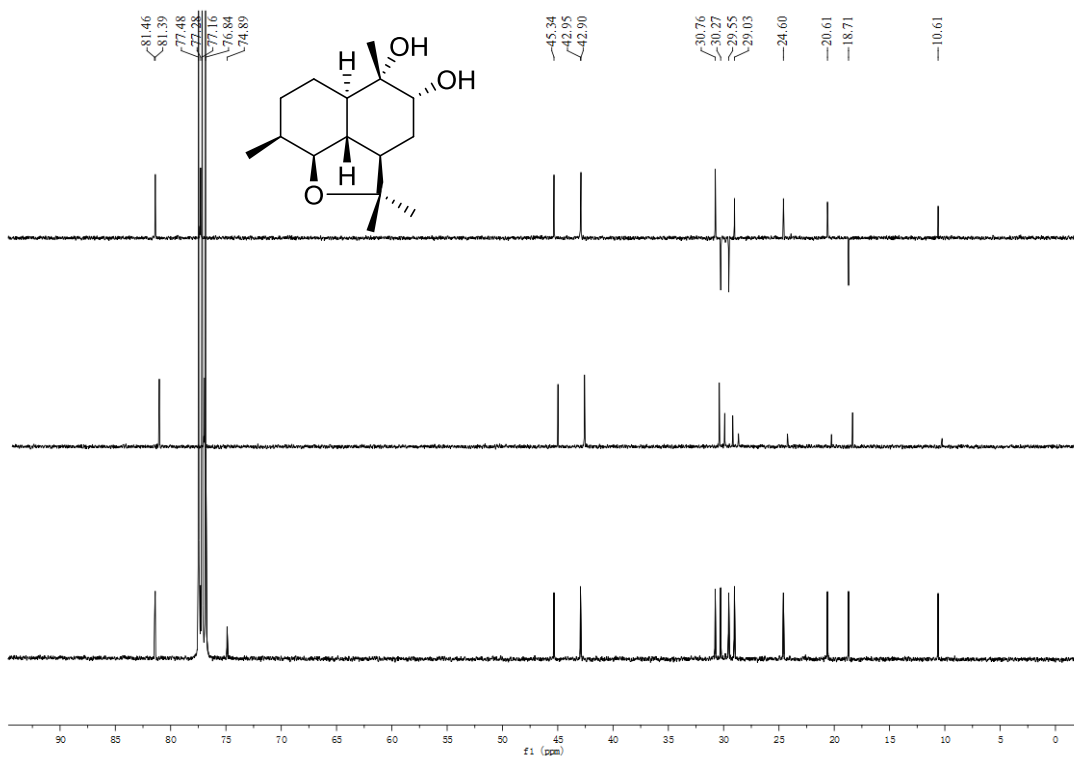

Figure S4. HSQC spectrum of compound 1 in CDCl<sub>3</sub>

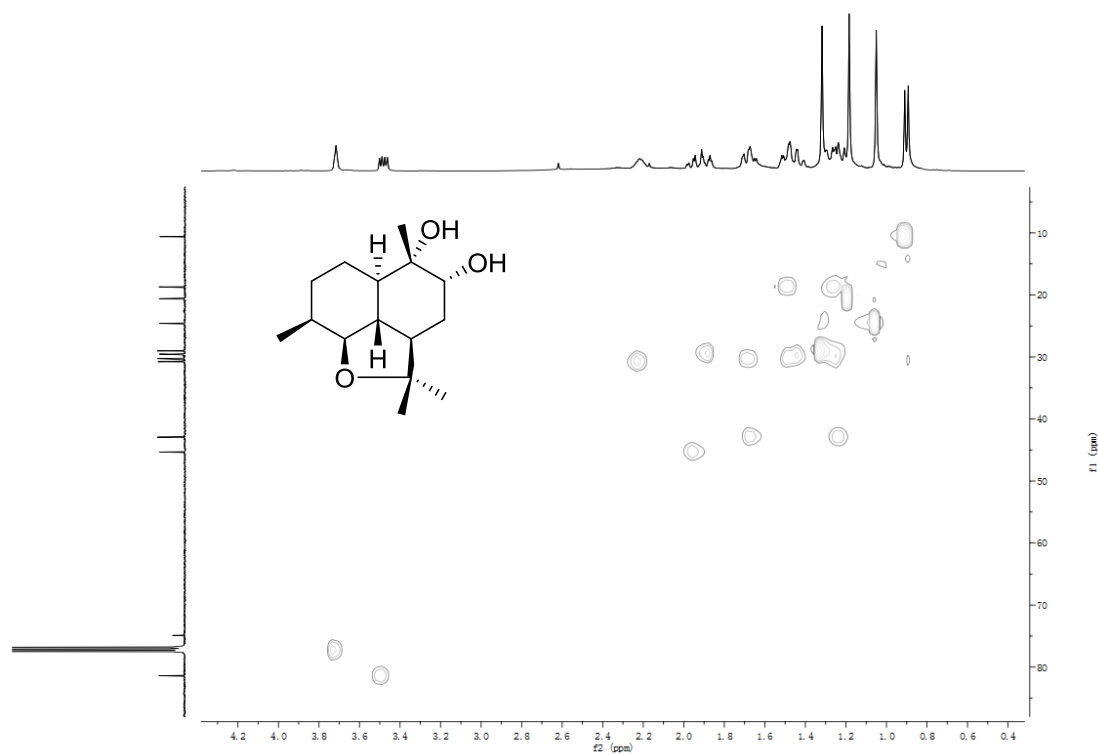

Figure S5. <sup>1</sup>H-<sup>1</sup>H COSY spectrum of compound 1 in CDCl<sub>3</sub>

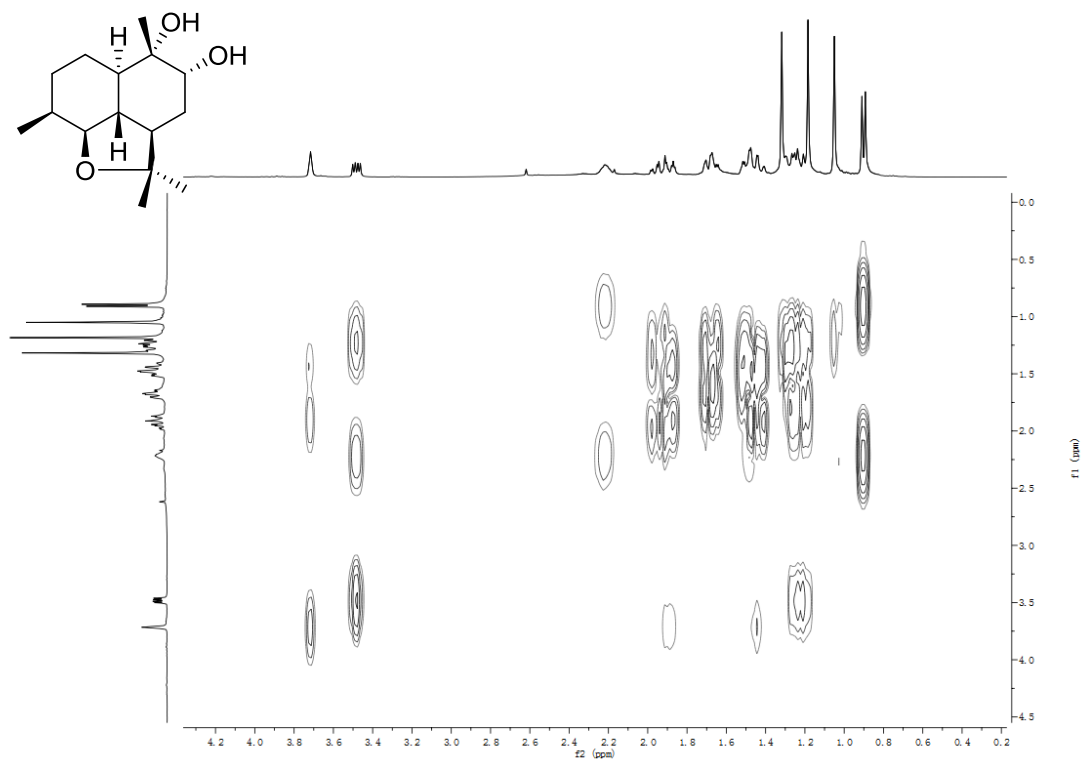

Figure S6. HMBC spectrum of compound **1** in CDCl<sub>3</sub>

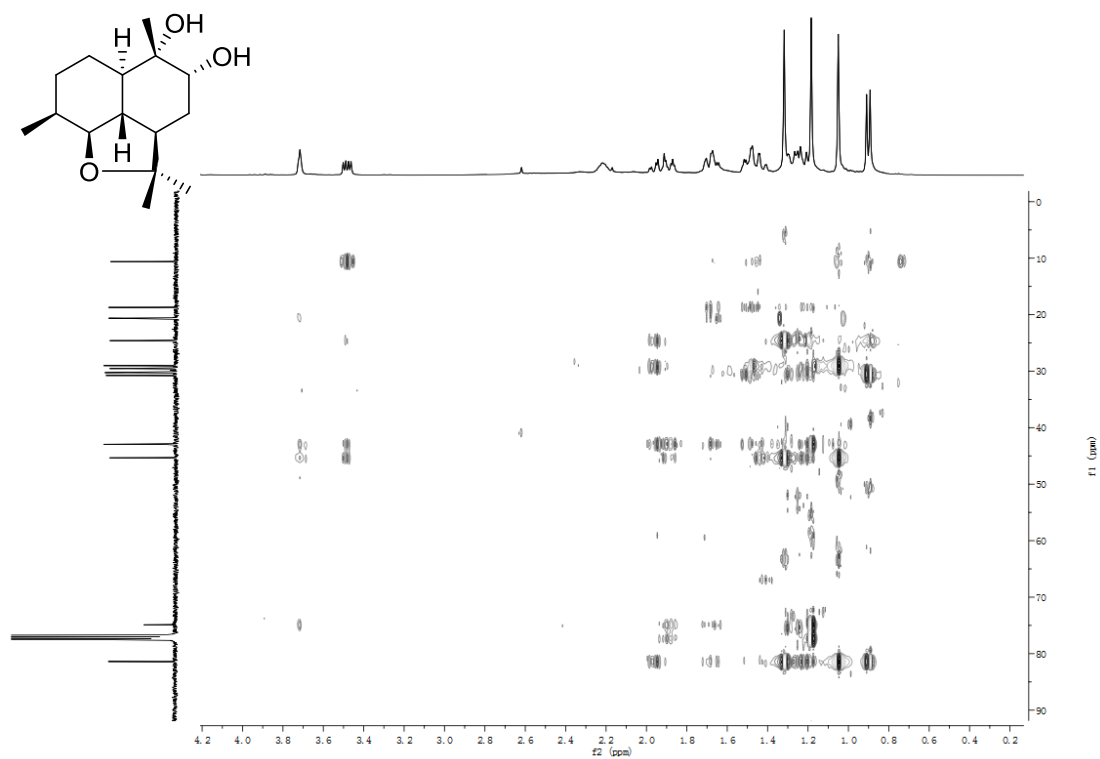

Figure S7. NOESY spectrum of compound **1** in CDCl<sub>3</sub>

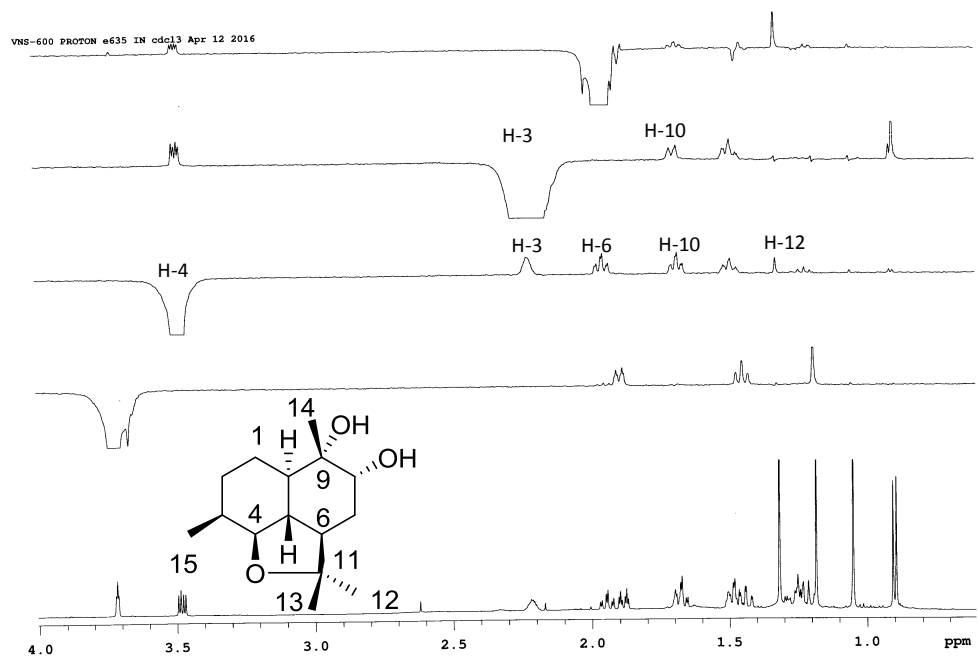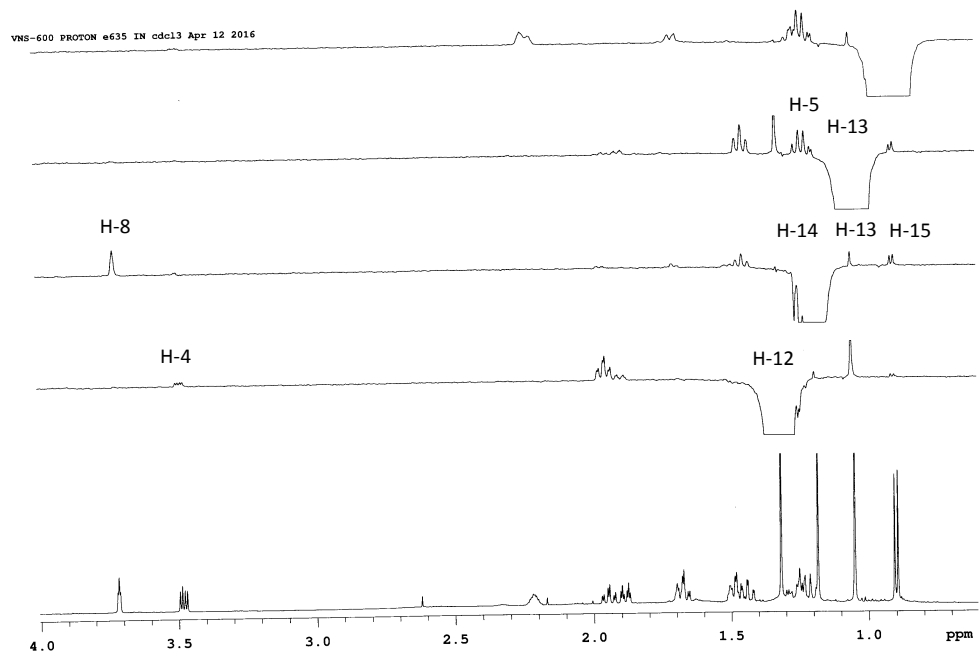

Figure S8. HRESIMS spectrum of compound 1

E635 #969 RT: 3.46 AV: 1 NL: 1.05E8  
 T: FTMS + c ESI Full ms [100.00-1000.00]  
 255.1945  
 C<sub>15</sub> H<sub>27</sub> O<sub>3</sub> = 255.1955  
 2.5 RDBE  
 -3.7311 ppm

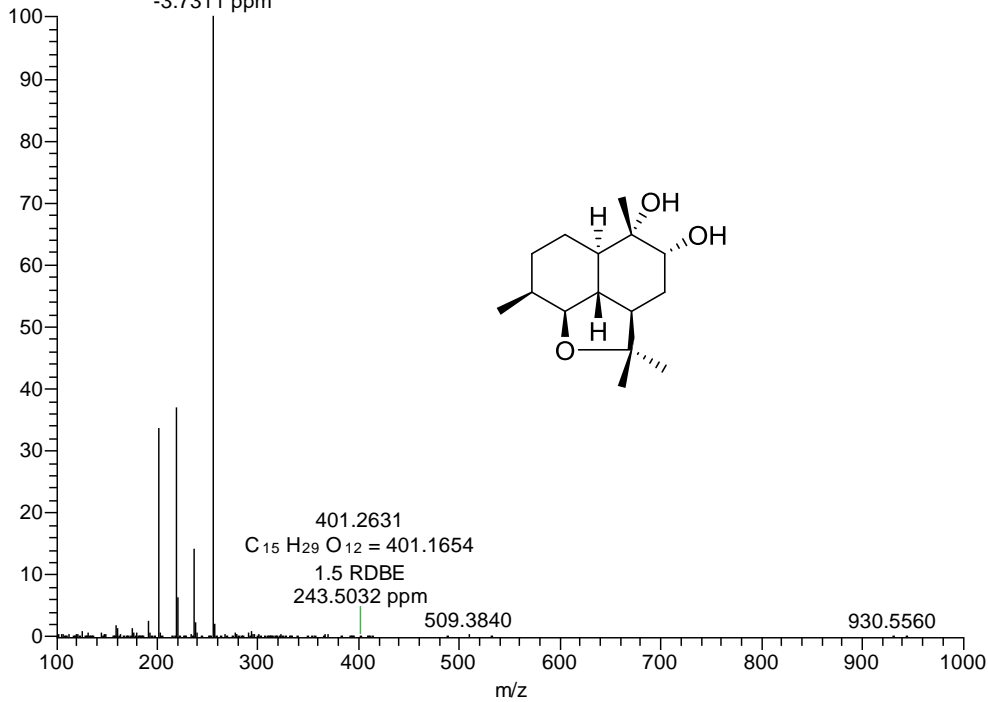

Figure S9. IR spectrum of compound 1

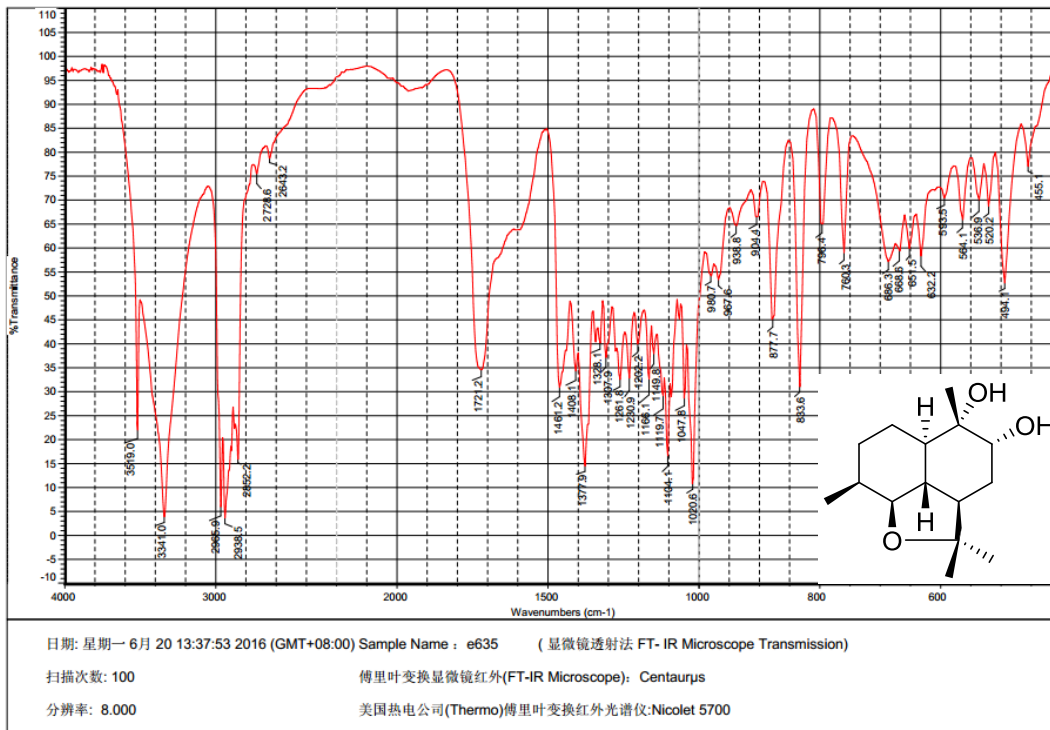

**Figure S10.** Mo<sub>2</sub>(AcO)<sub>4</sub>-induced CD spectrum of compound **1**

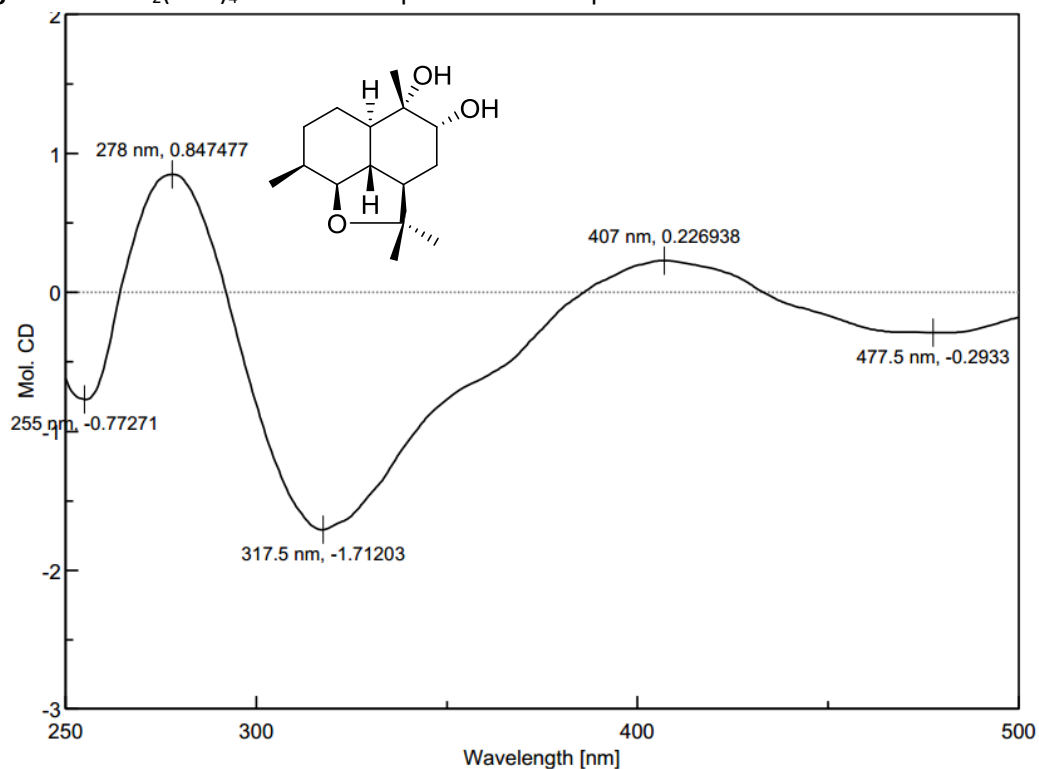

[Comments]  
 Sample name e635-Mo  
 Comment

Memory-11

**Figure S11.** <sup>1</sup>H NMR spectrum of compound **2** in CDCl<sub>3</sub>

<sup>1</sup>H NMR in CDCl<sub>3</sub> at 400MHz

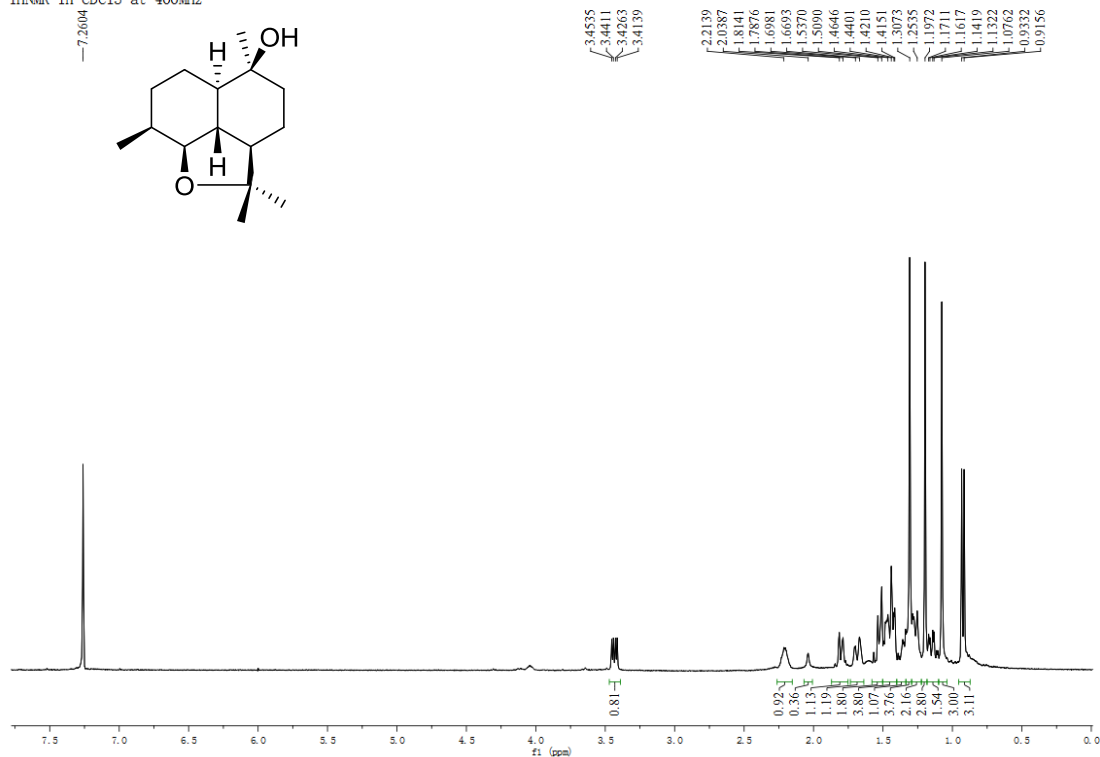

Figure S12.  $^{13}\text{C}$  NMR spectrum of compound **2** in  $\text{CDCl}_3$

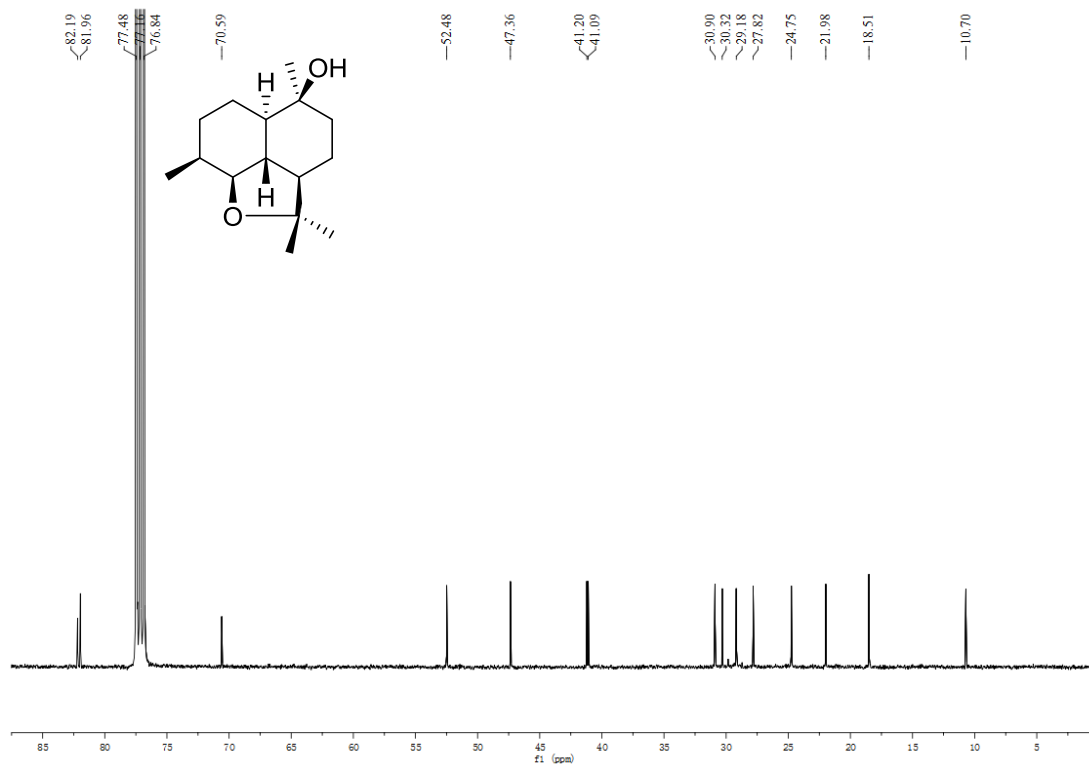

Figure S13. DEPT spectrum of compound **2** in  $\text{CDCl}_3$

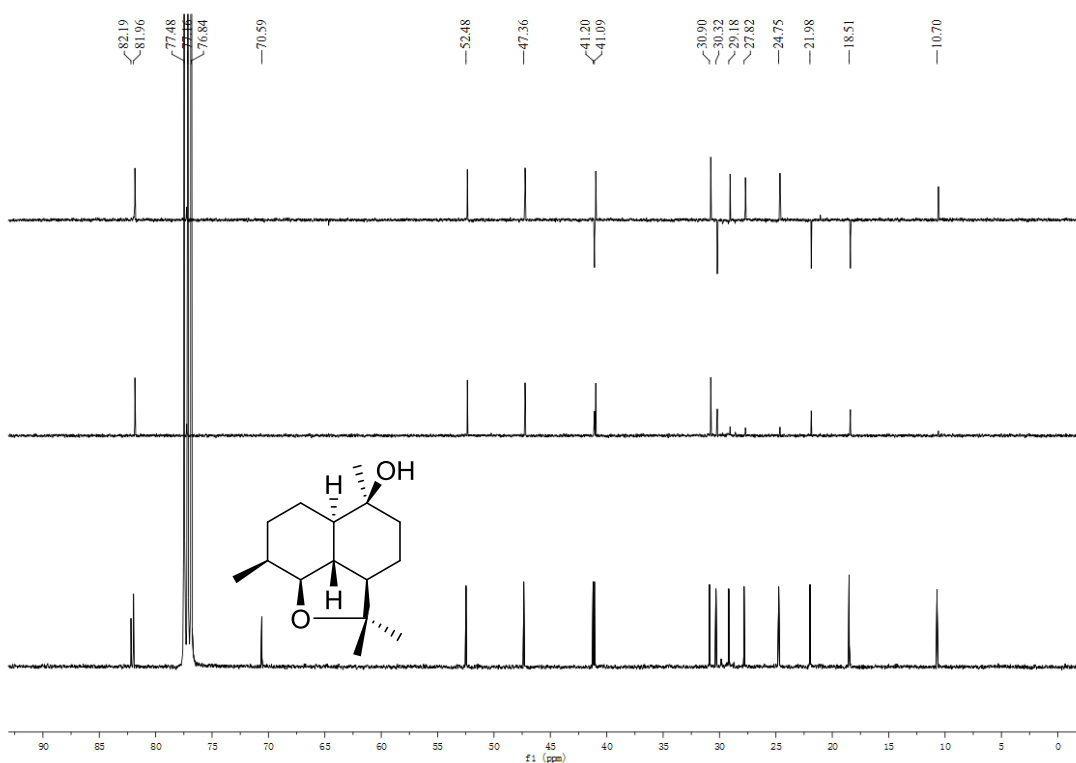



Figure S14. HSQC spectrum of compound **2** in CDCl<sub>3</sub>

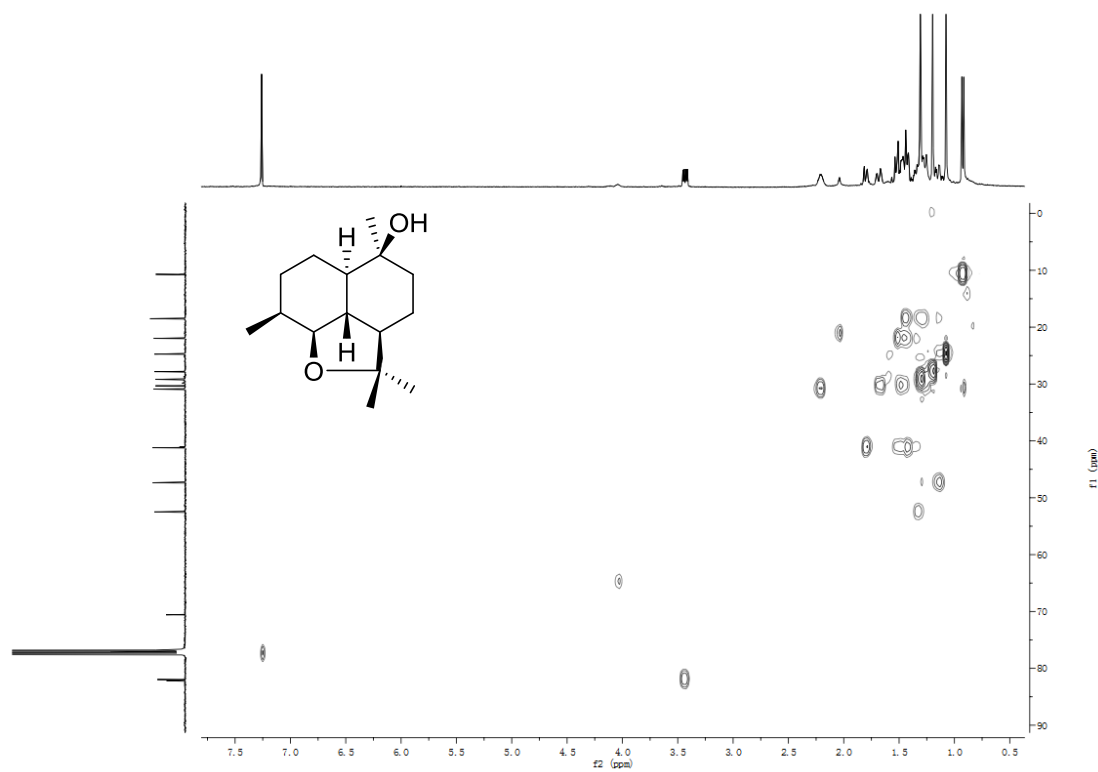

Figure S15. <sup>1</sup>H-<sup>1</sup>H COSY spectrum of compound **2** in CDCl<sub>3</sub>

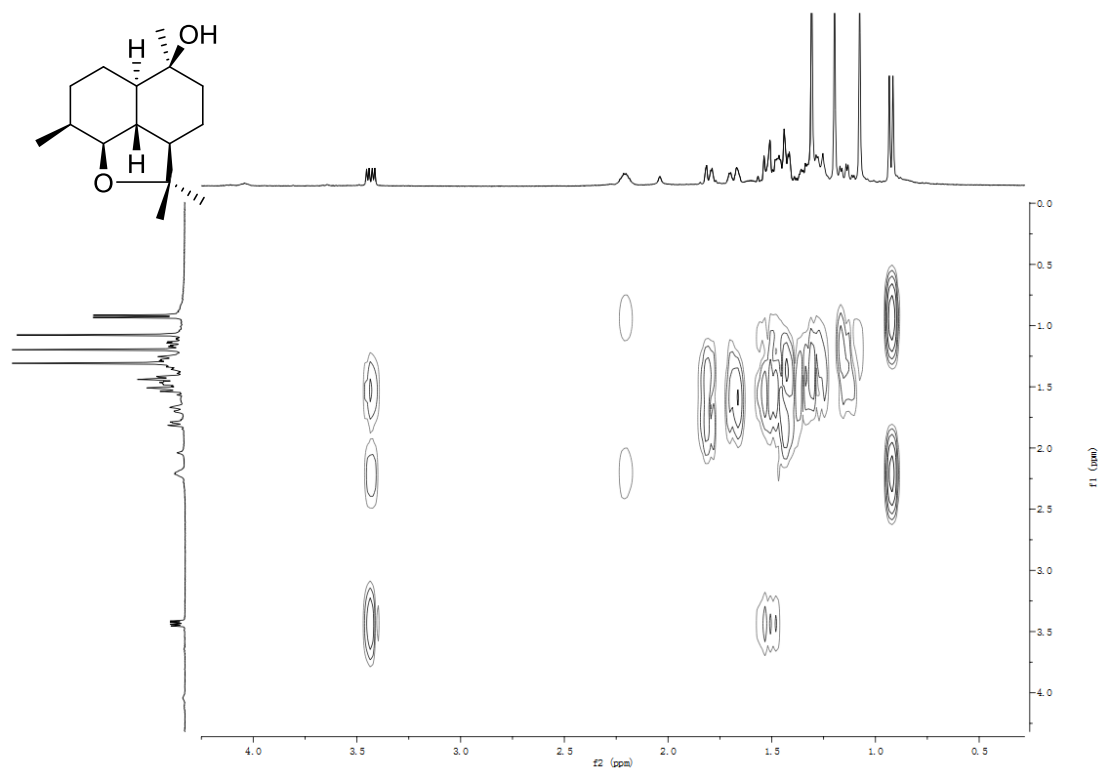

Figure S16. HMBC spectrum of compound **2** in CDCl<sub>3</sub>

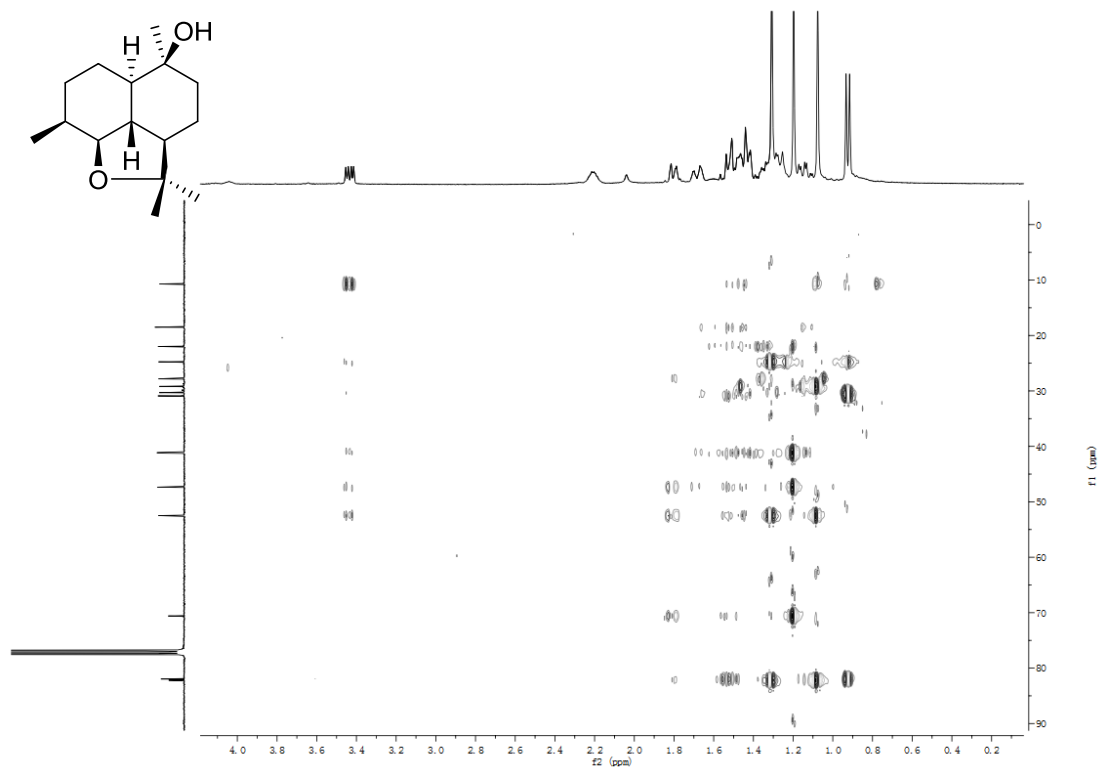

Figure S17. NOESY spectrum of compound **2** in  $\text{CDCl}_3$

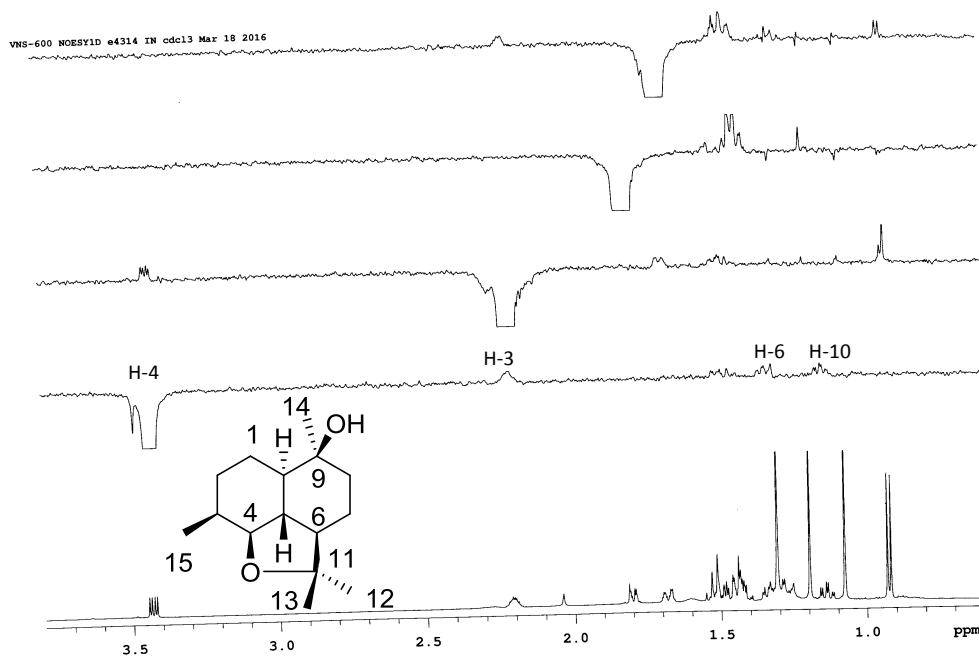

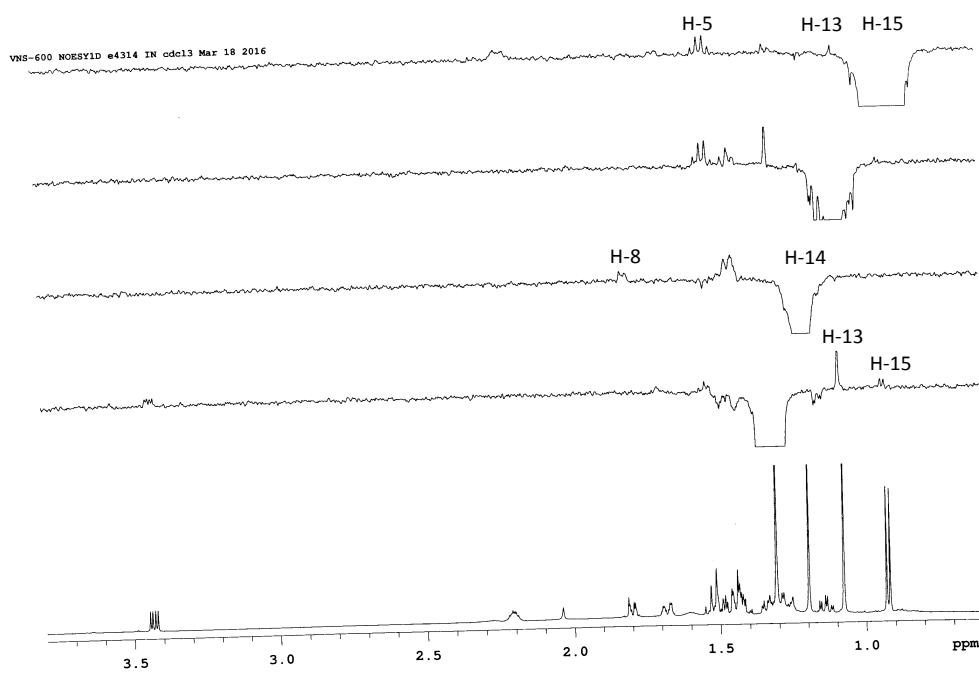

VNS-600 NOESY1D e4314 IN cdc13 Mar 30 2016

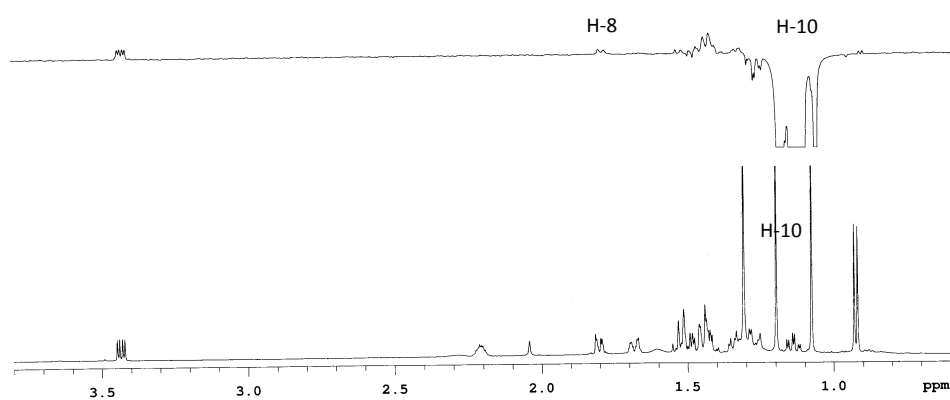

**Figure S18.** HRESIMS spectrum of compound **2**

E4314 #1352 RT: 4.58 AV: 1 NL: 8.57E7  
 T: FTMS + c ESI Full ms [100.00-1000.00]

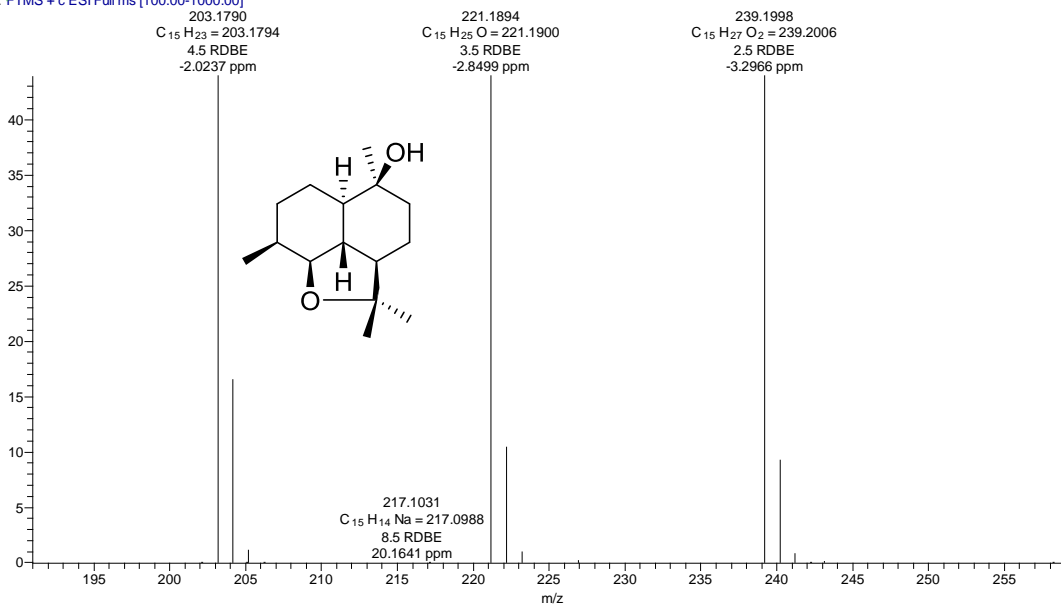

Figure S19. IR spectrum of compound 2

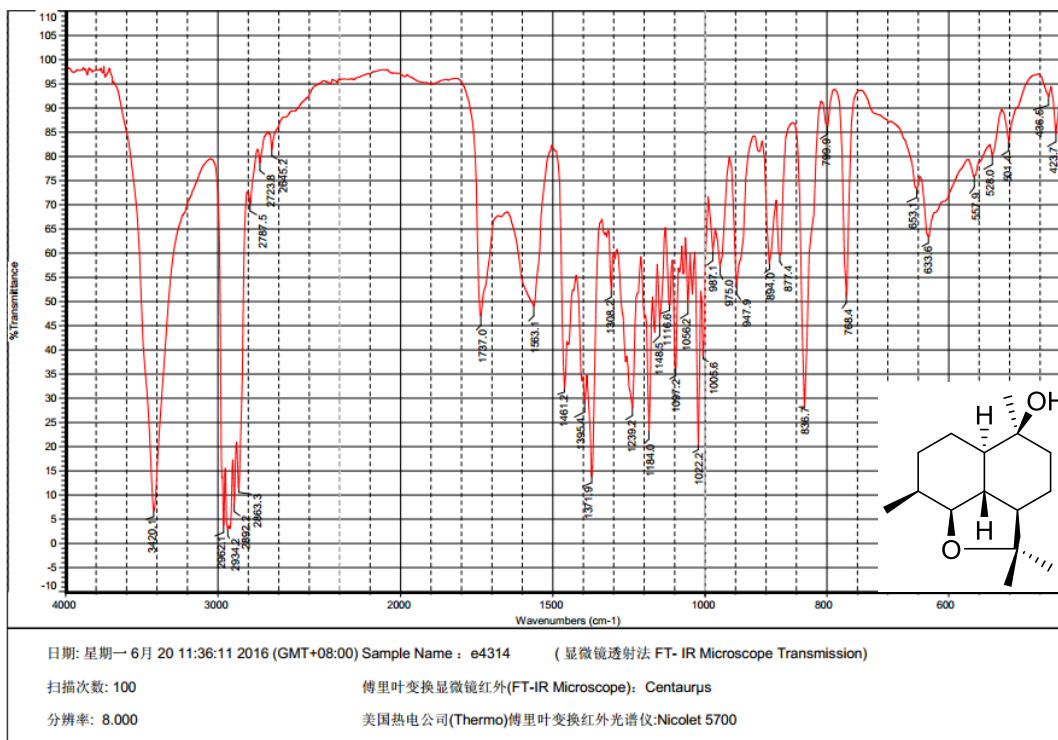

日期: 星期一 6月 20 11:36:11 2016 (GMT+08:00) Sample Name : e4314 (显微镜透射法 FT-IR Microscope Transmission)  
 扫描次数: 100 傅里叶变换显微镜红外 (FT-IR Microscope): Centaurus  
 分辨率: 8.000 美国热电公司 (Thermo) 傅里叶变换红外光谱仪: Nicolet 5700

**Figure S20.**  $^1\text{H}$  NMR spectrum of compound **3** in  $\text{CDCl}_3$

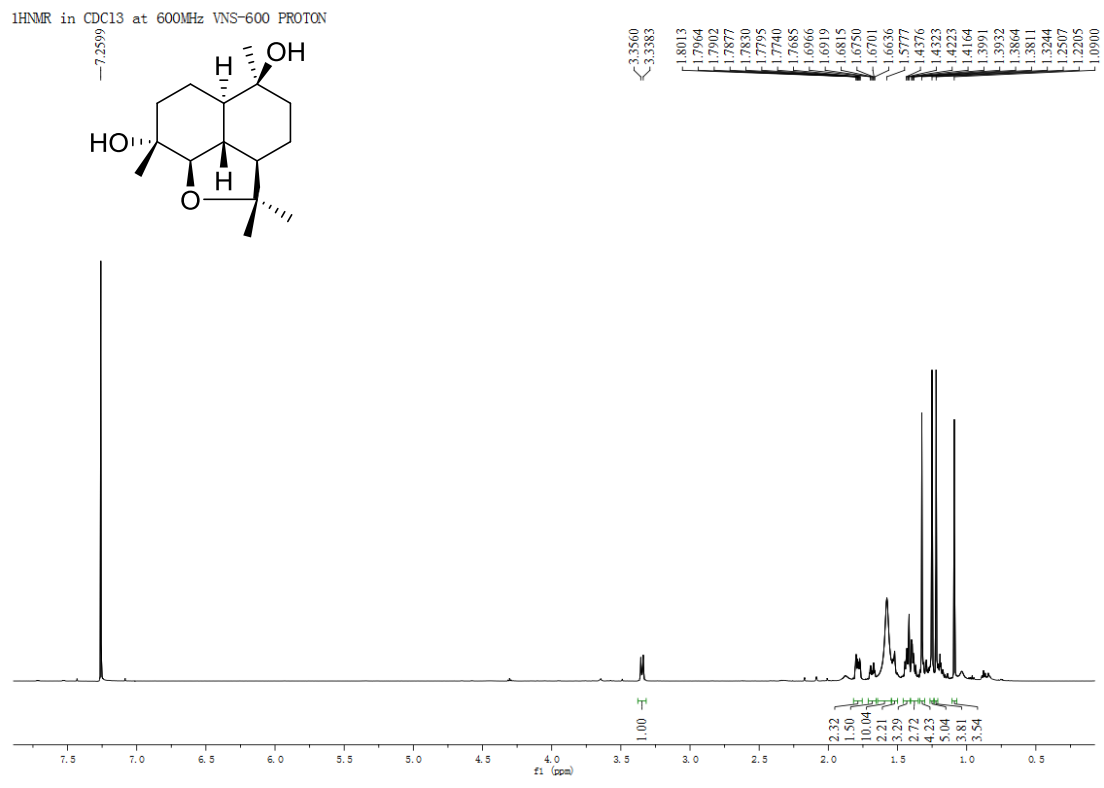

**Figure S21.**  $^{13}\text{C}$  NMR spectrum of compound **3** in  $\text{CDCl}_3$

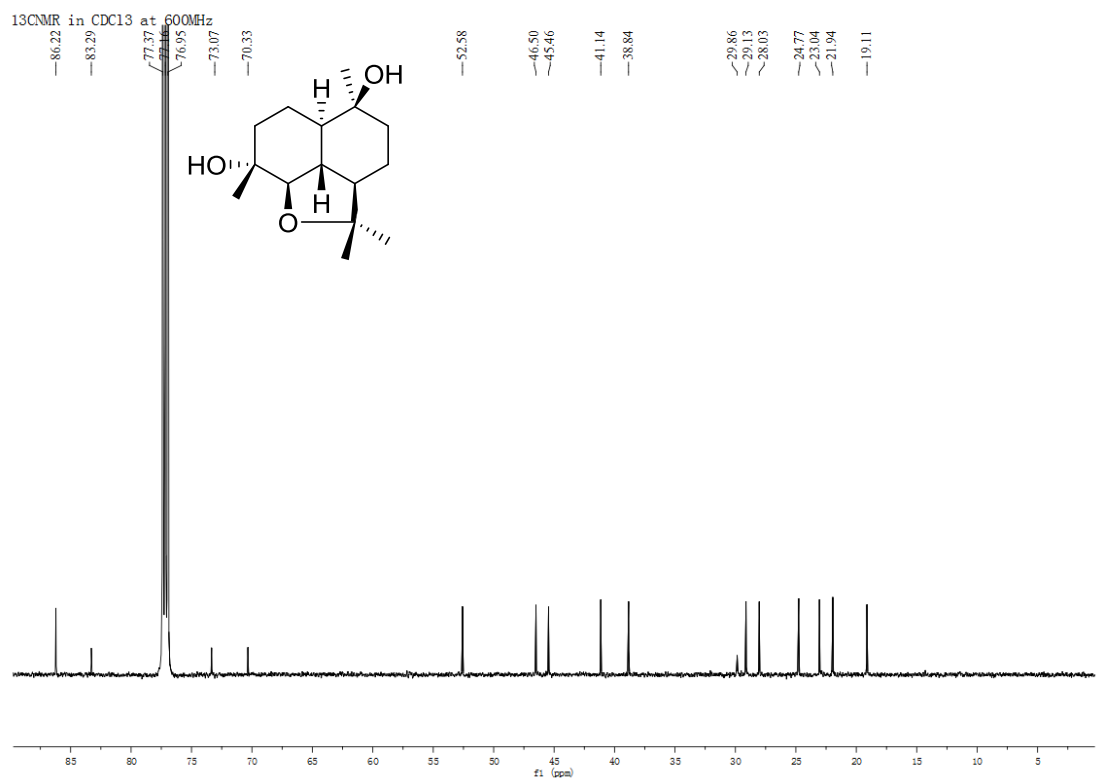

Figure S22. DEPT spectrum of compound **3** in CDCl<sub>3</sub>

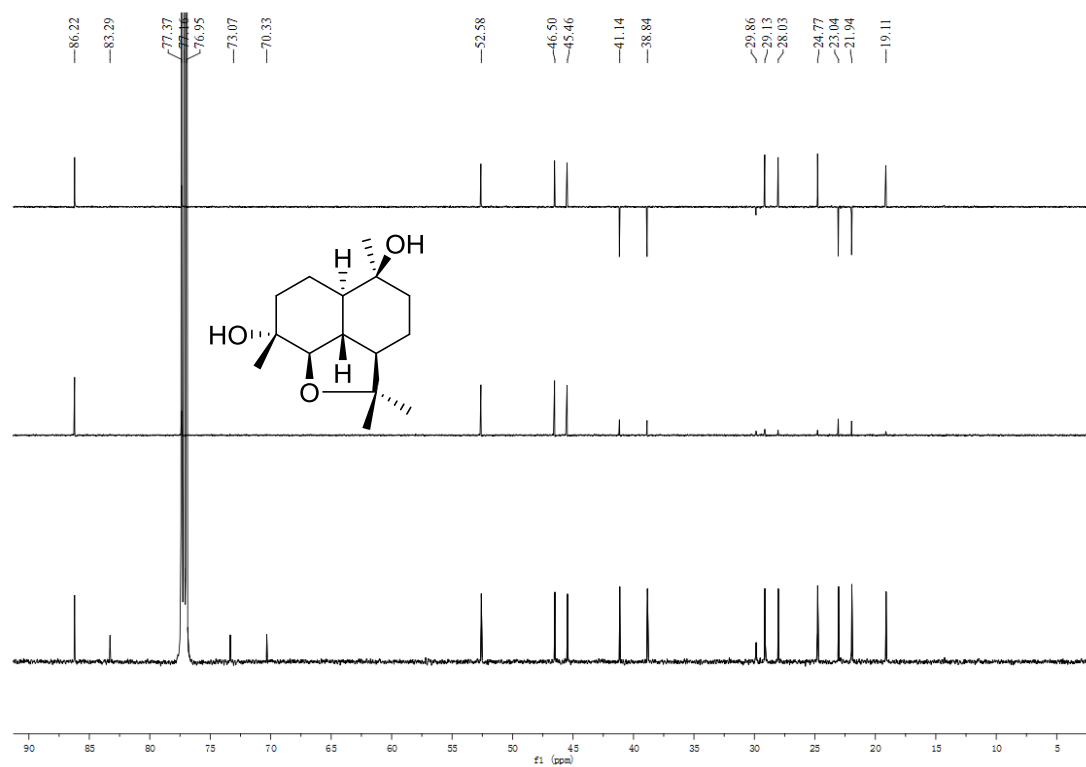

Figure S23. HSQC spectrum of compound **3** in CDCl<sub>3</sub>

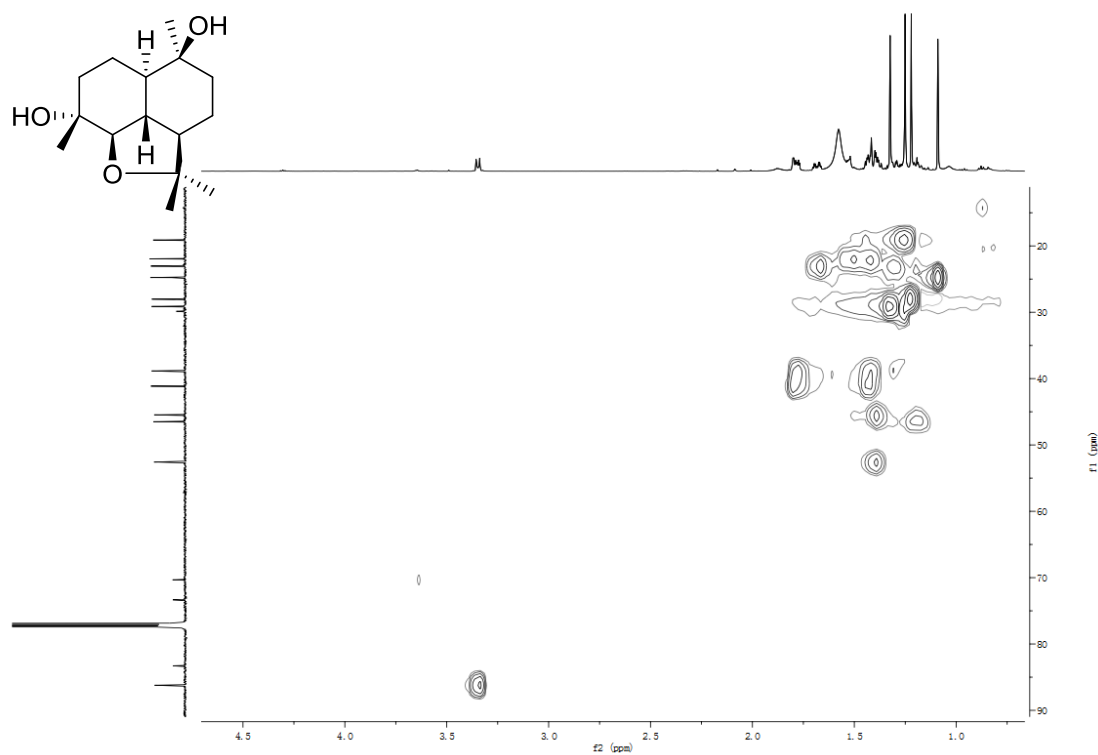

Figure S24. <sup>1</sup>H-<sup>1</sup>H COSY spectrum of compound **3** in CDCl<sub>3</sub>

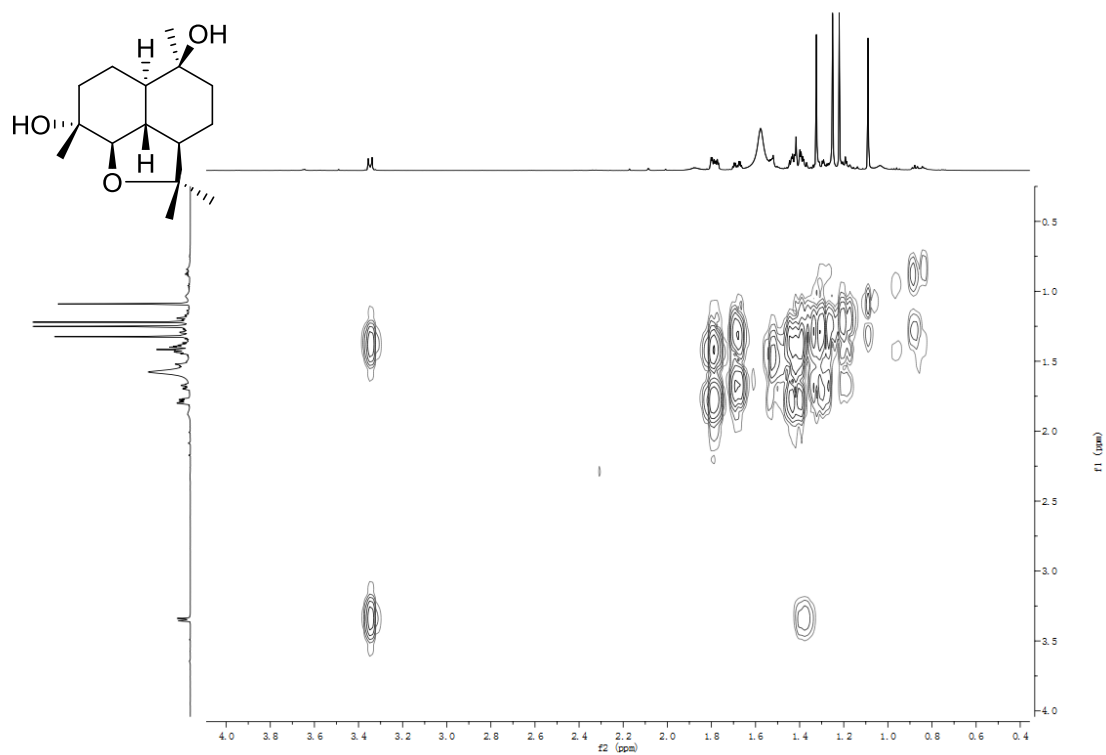

Figure S25. HMBC spectrum of compound **3** in  $\text{CDCl}_3$

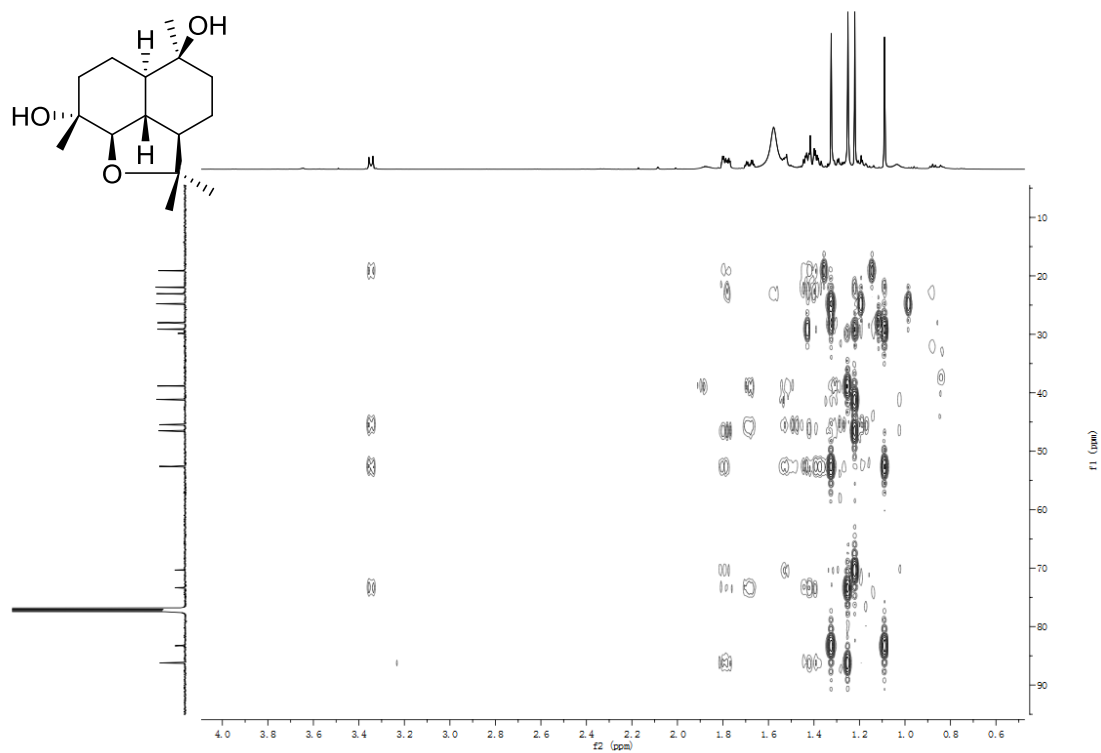

Figure S26. NOESY spectrum of compound **3** in  $\text{CDCl}_3$

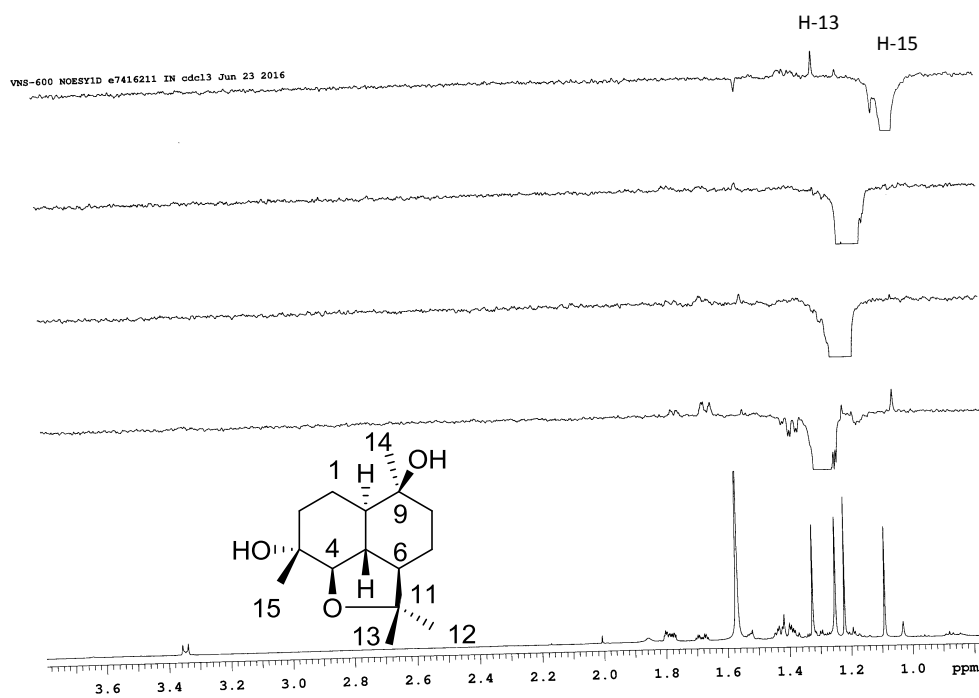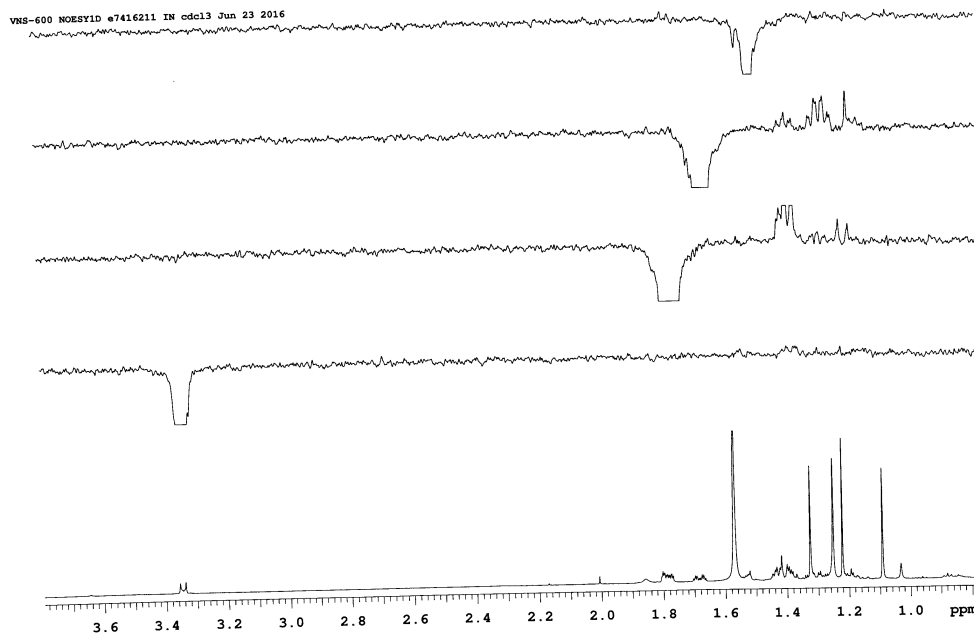

Figure S27. HRESIMS spectrum of compound 3



E7416211 #960 RT: 3.21 AV: 1 NL: 8.52E7  
T: FTMS + c ESI Full ms [100.00-1000.00]

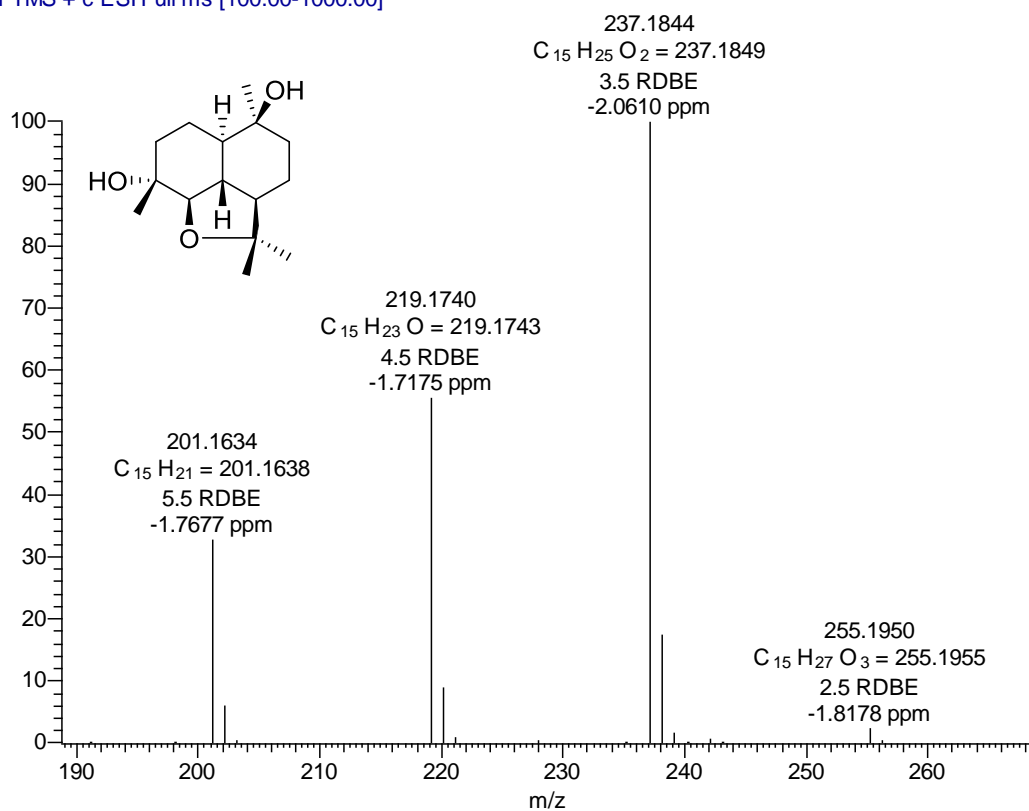

Figure S28. IR spectrum of compound 3

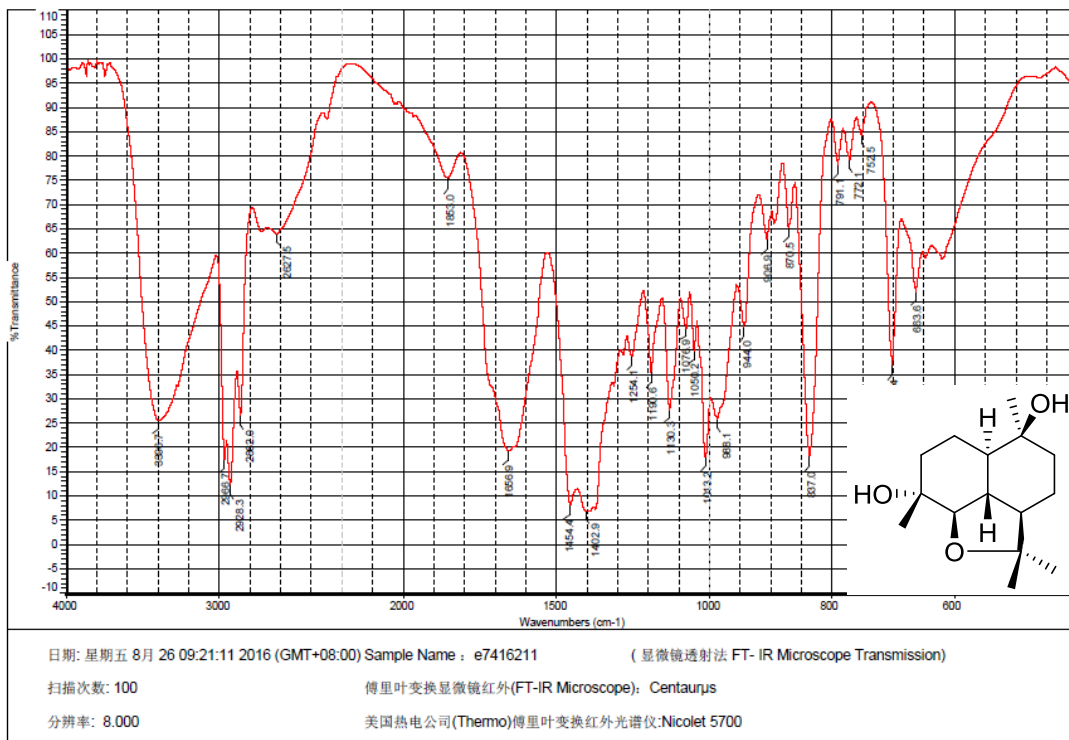

Figure S29.  $^1\text{H}$  NMR spectrum of compound **4** in  $\text{CDCl}_3$

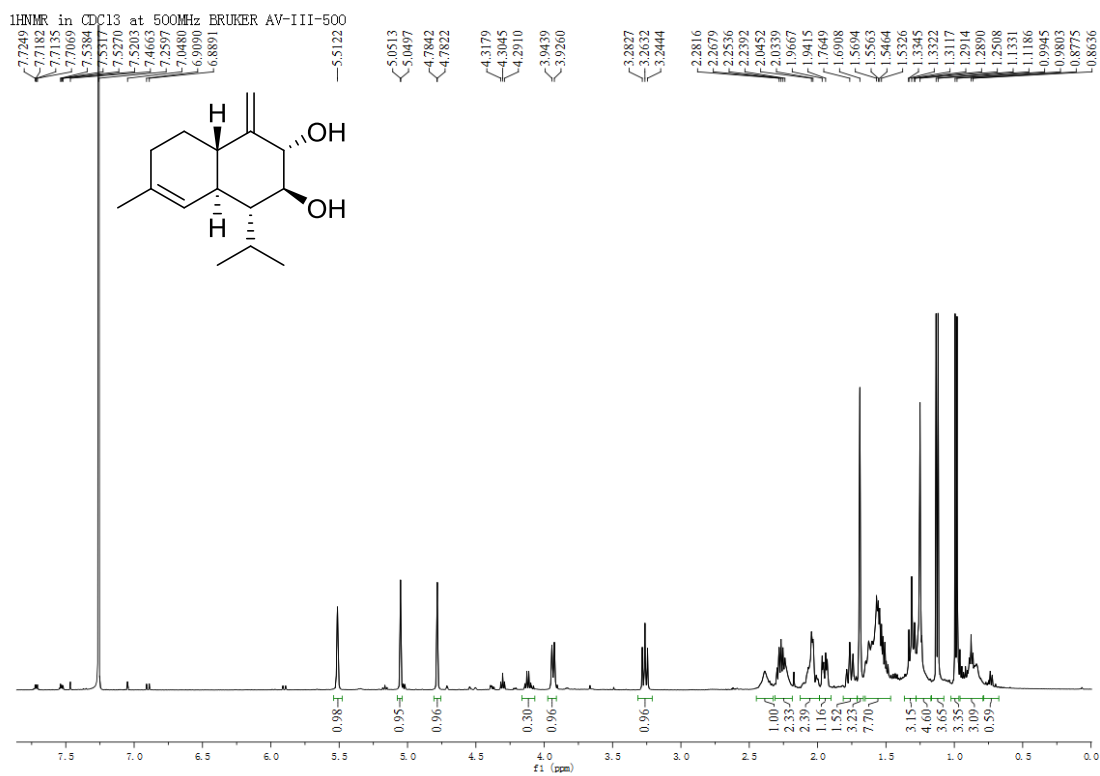

Figure S30.  $^{13}\text{C}$  NMR spectrum of compound **4** in  $\text{CDCl}_3$

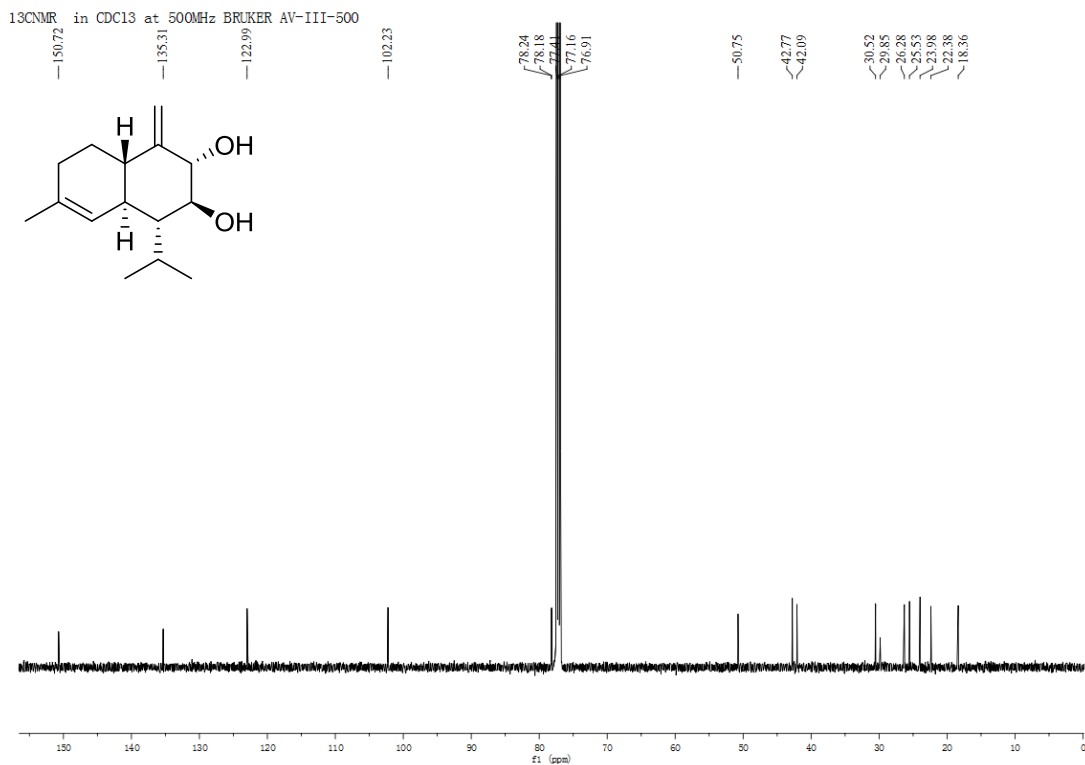

Figure S31. DEPT spectrum of compound 4 in CDCl<sub>3</sub>

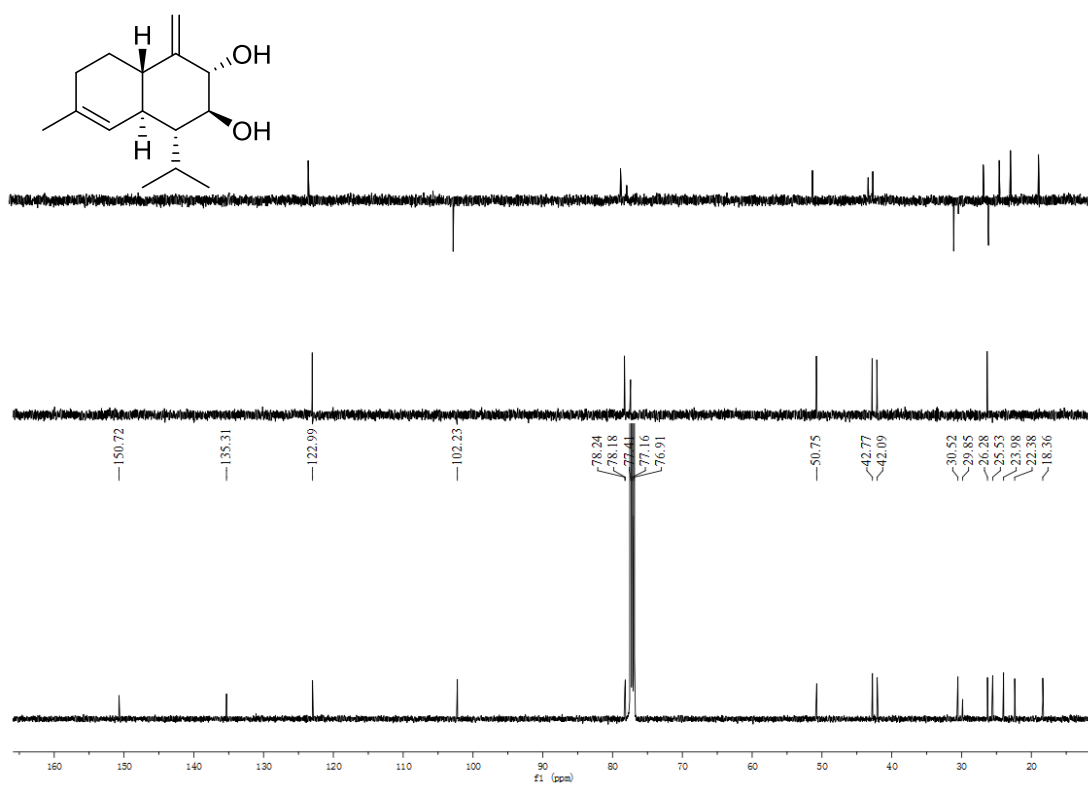

Figure S32. HSQC spectrum of compound 4 in CDCl<sub>3</sub>

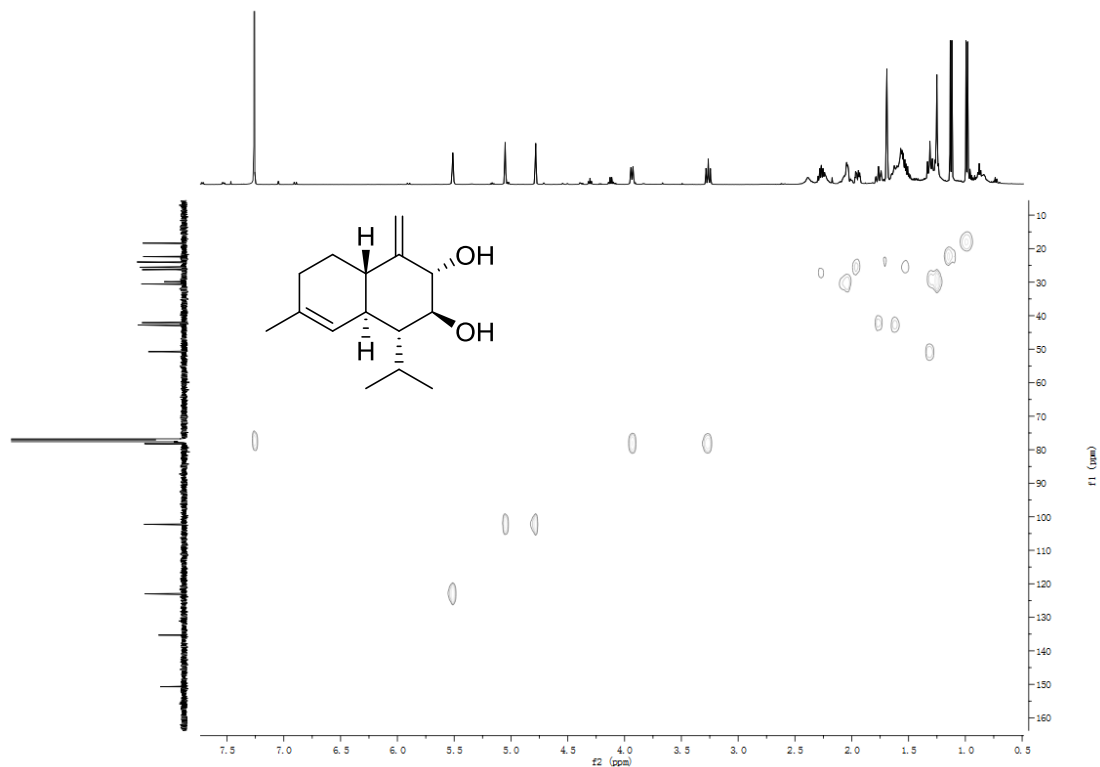

**Figure S33.**  $^1\text{H}$ - $^1\text{H}$  COSY spectrum of compound **4** in  $\text{CDCl}_3$

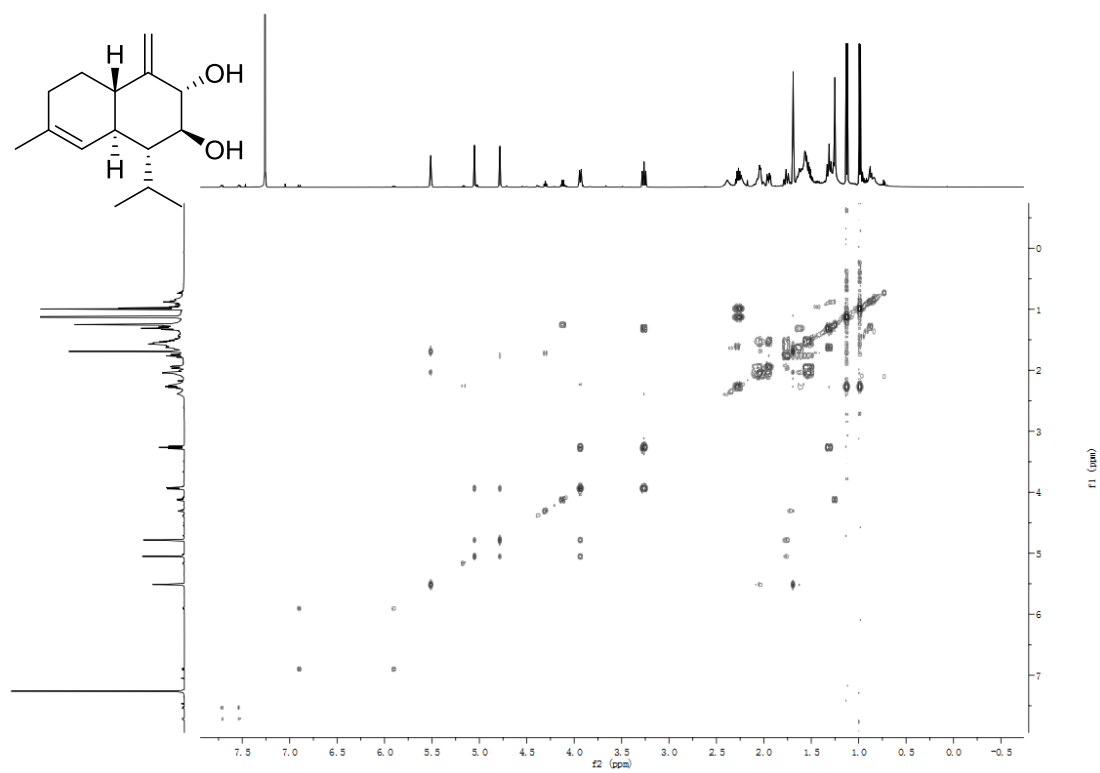

**Figure S34.** HMBC spectrum of compound **4** in  $\text{CDCl}_3$

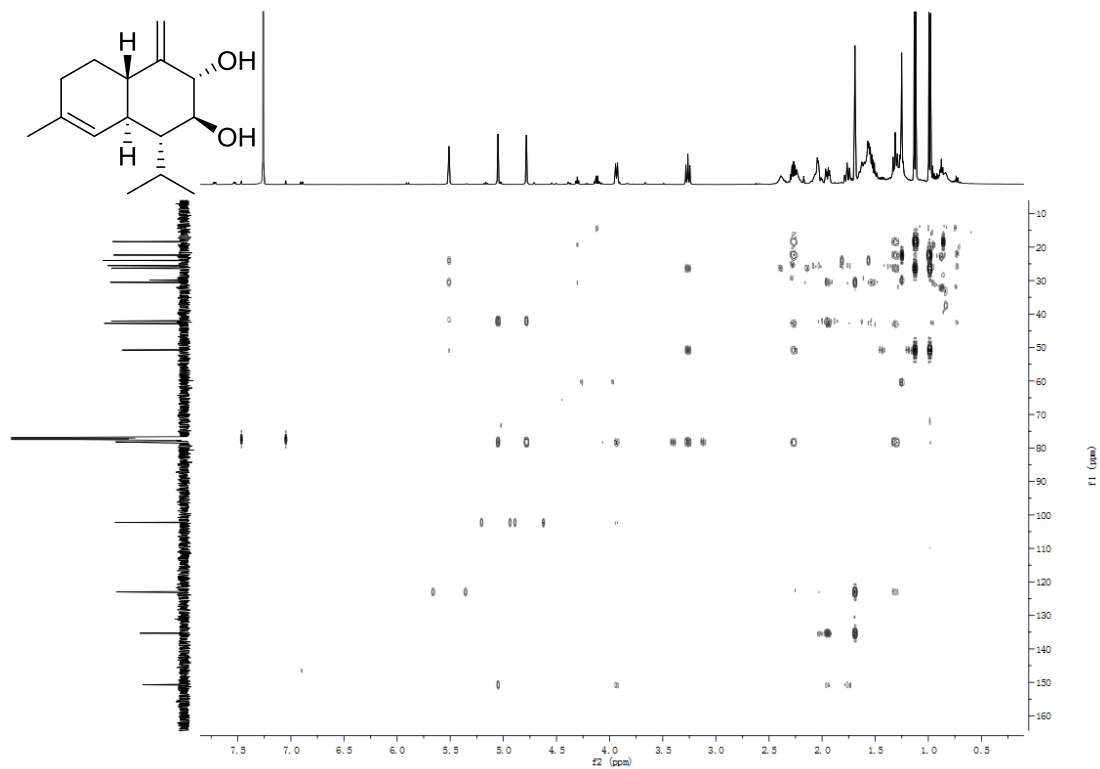

Figure S35. NOESY spectrum of compound **4** in  $\text{CDCl}_3$

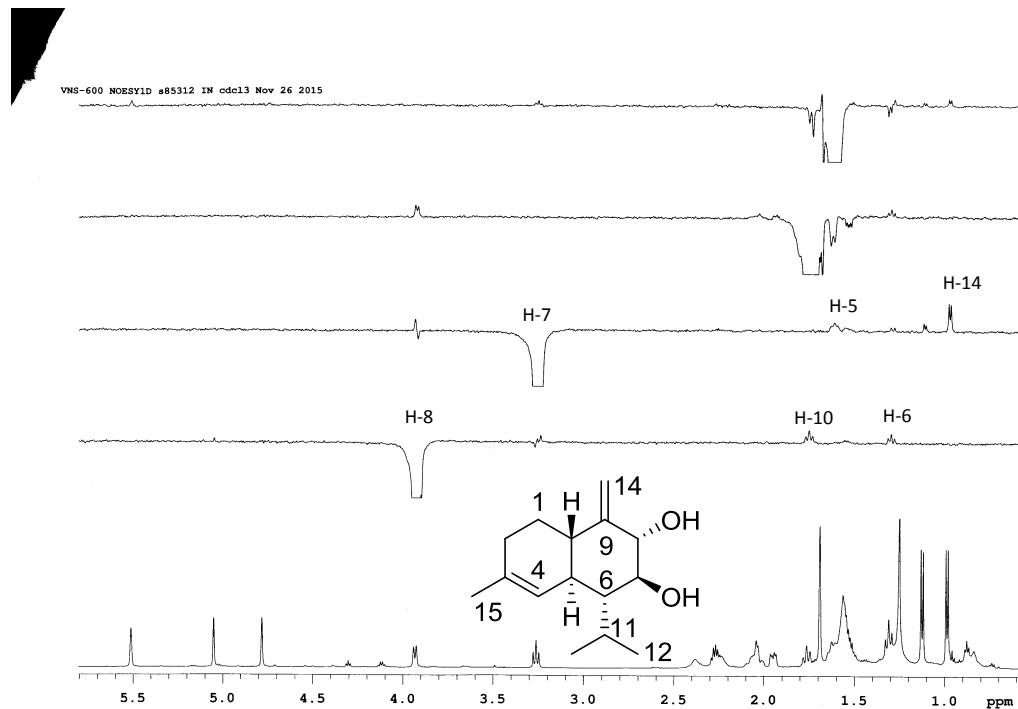

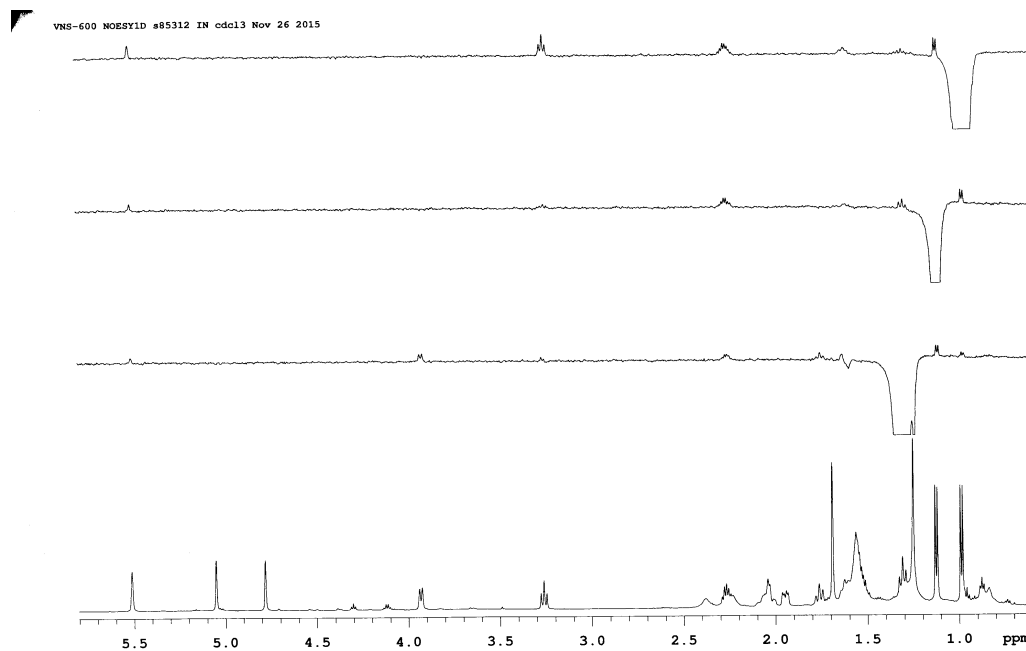

**Figure S36.** HRESIMS spectrum of compound **4**

S85312 #1884 RT: 5.23 AV: 1 NL: 7.52E6

T: FTMS + c ESI Full ms [100.00-1000.00]

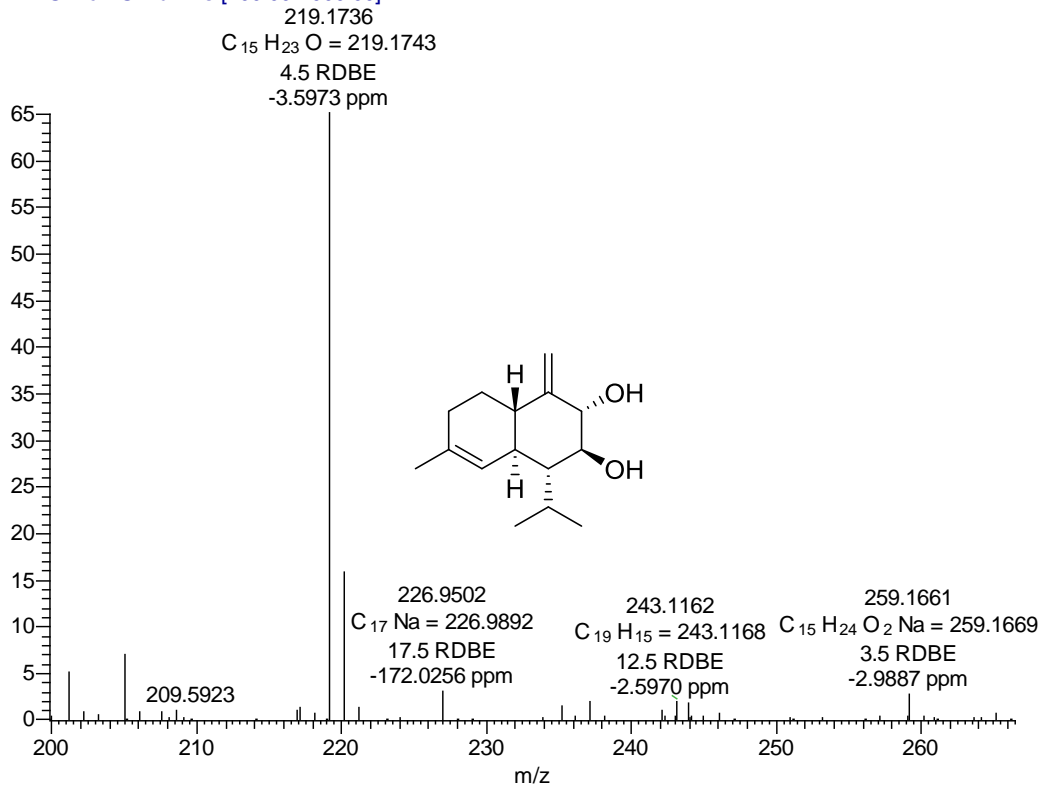

Figure S37. IR spectrum of compound 4

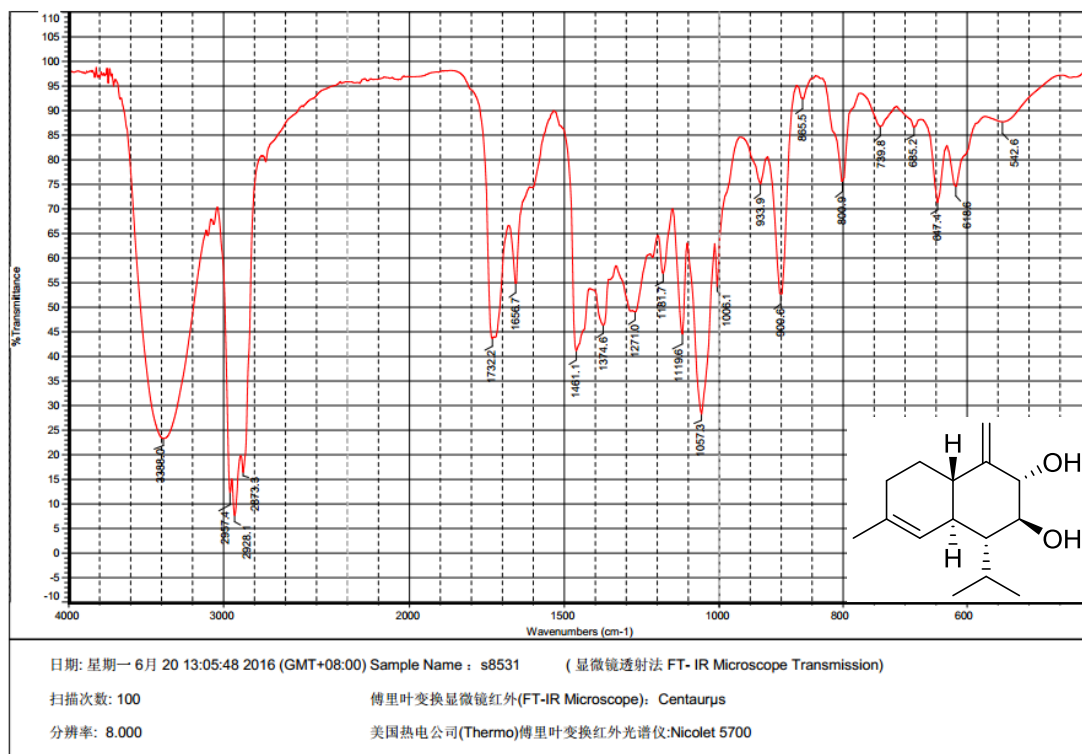

Figure S38. CD spectrum of compound 4

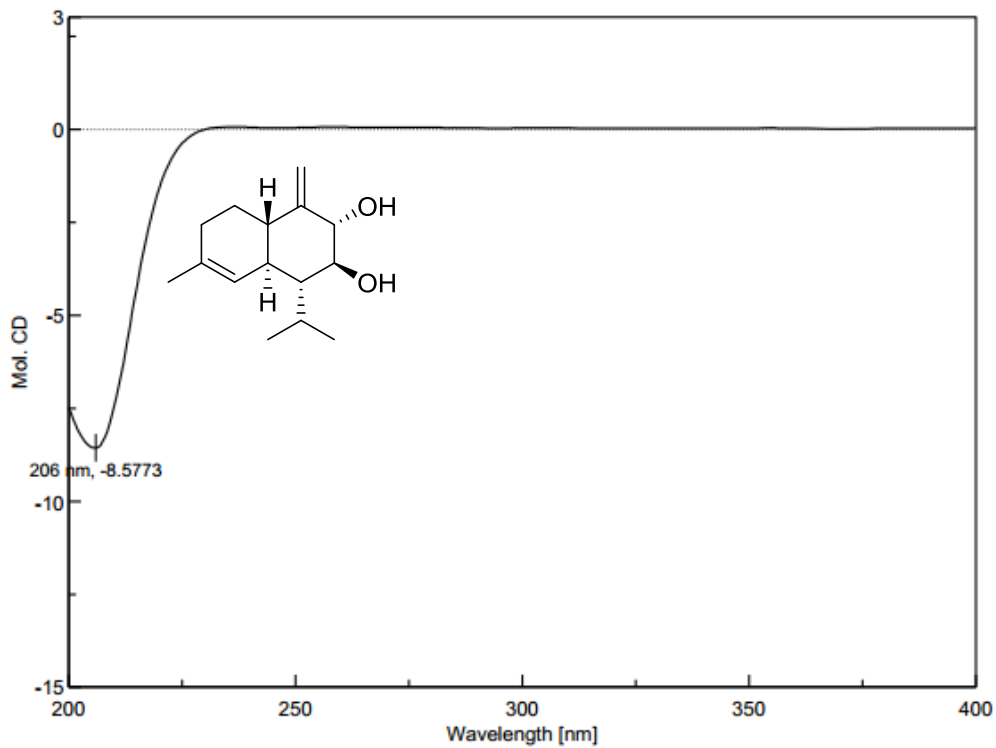

[Comments]  
Sample name S85312

— S85312-1-s-m.jws

Figure S39. <sup>1</sup>H NMR spectrum of compound 5 in CDCl<sub>3</sub>

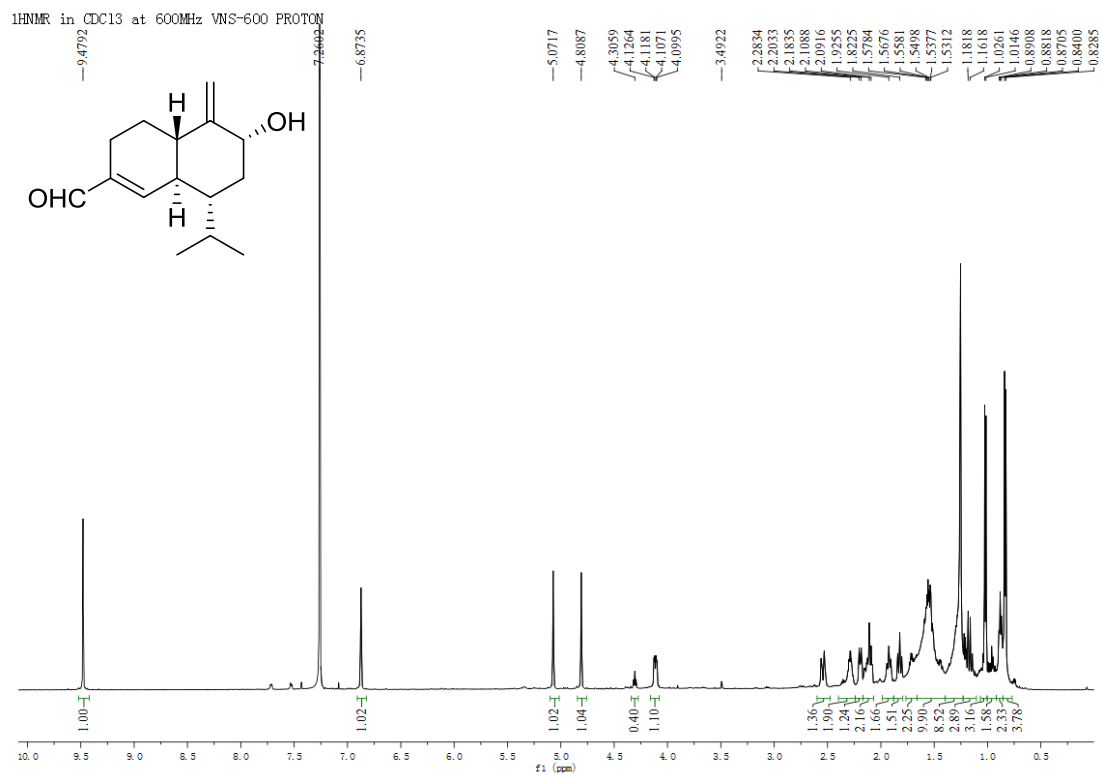

Figure S40. <sup>13</sup>C NMR spectrum of compound 5 in CDCl<sub>3</sub>

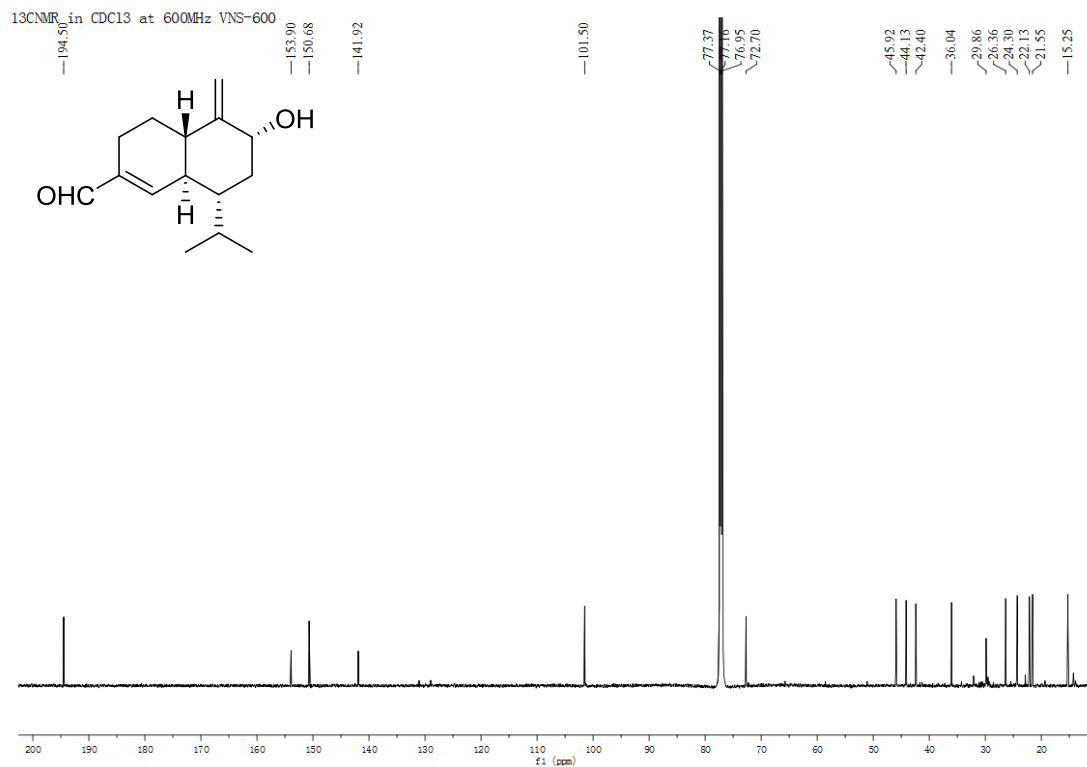



Figure S41. DEPT spectrum of compound 5 in CDCl<sub>3</sub>

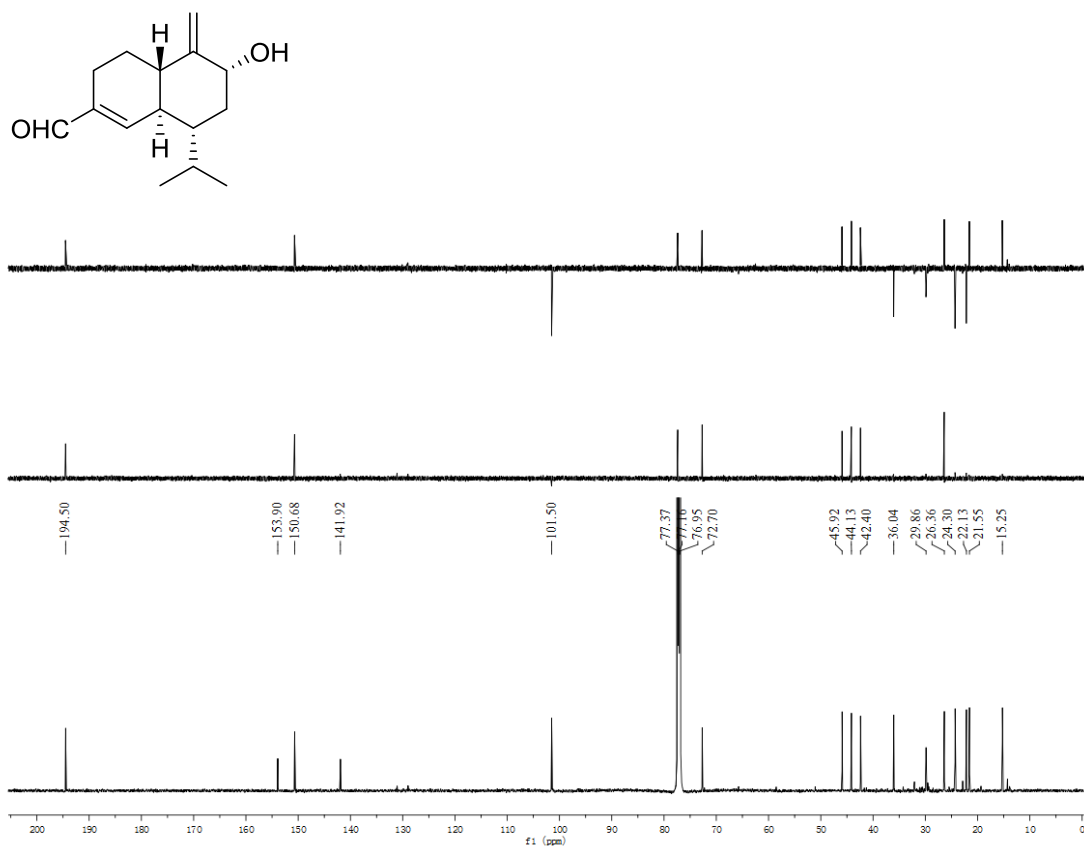

Figure S42. HSQC spectrum of compound 5 in CDCl<sub>3</sub>

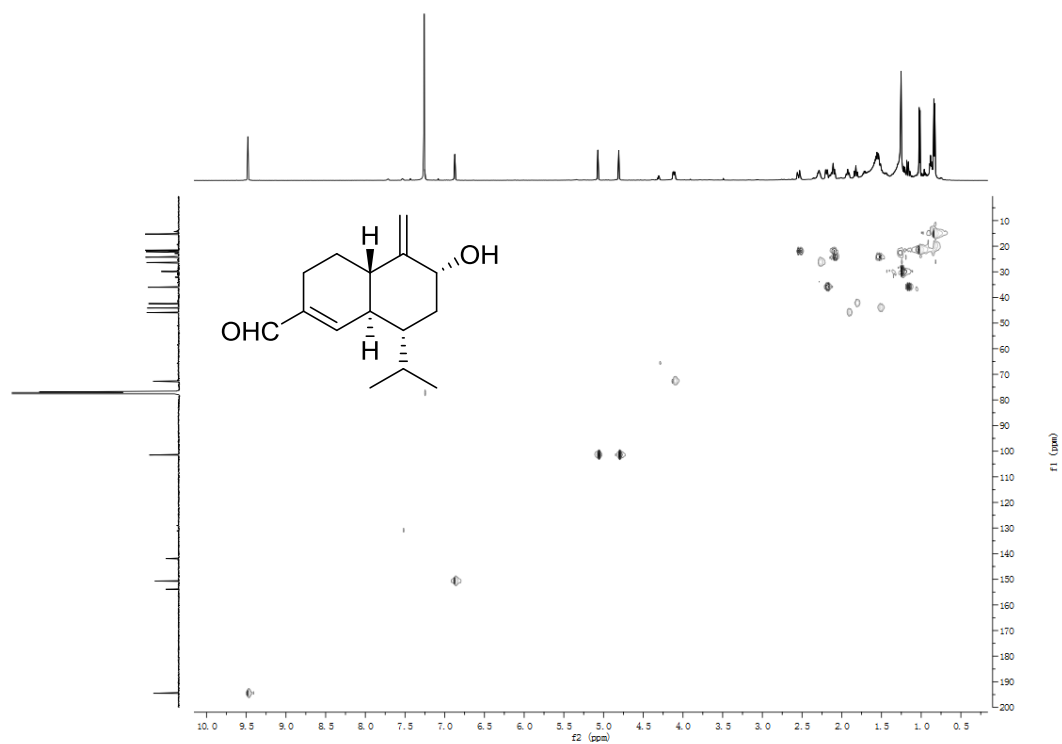

Figure S43.  $^1\text{H}$ - $^1\text{H}$  COSY spectrum of compound **5** in  $\text{CDCl}_3$

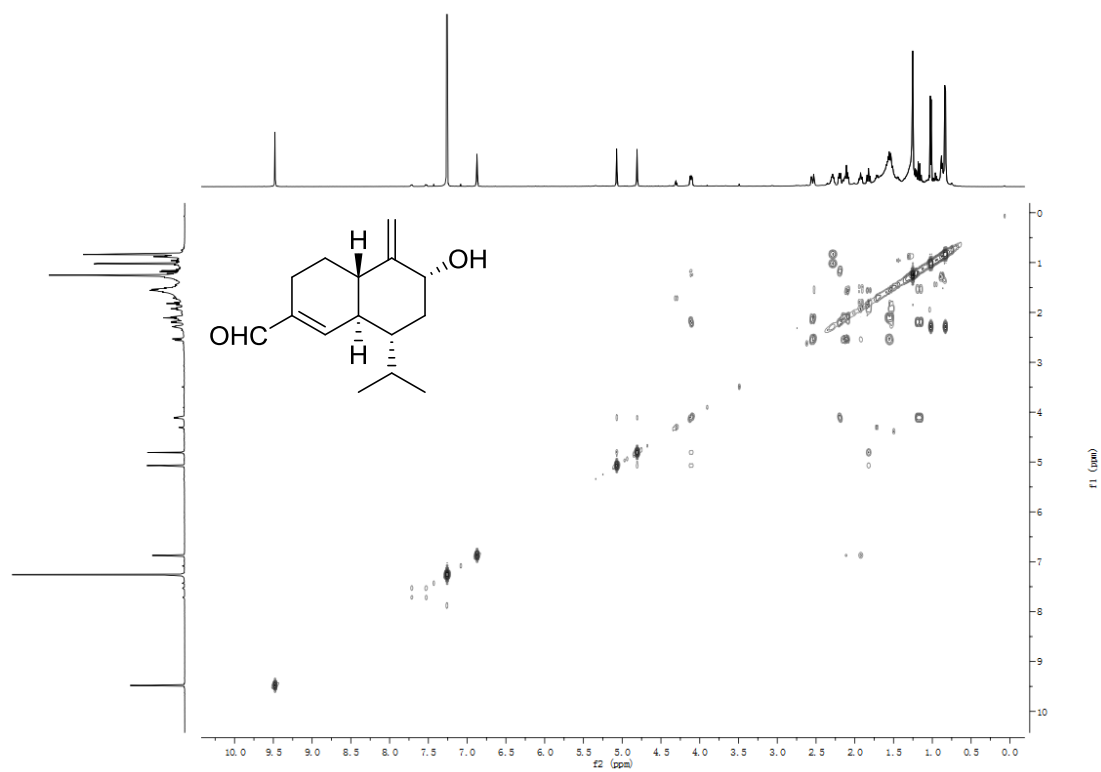

Figure S44. HMBC spectrum of compound **5** in  $\text{CDCl}_3$

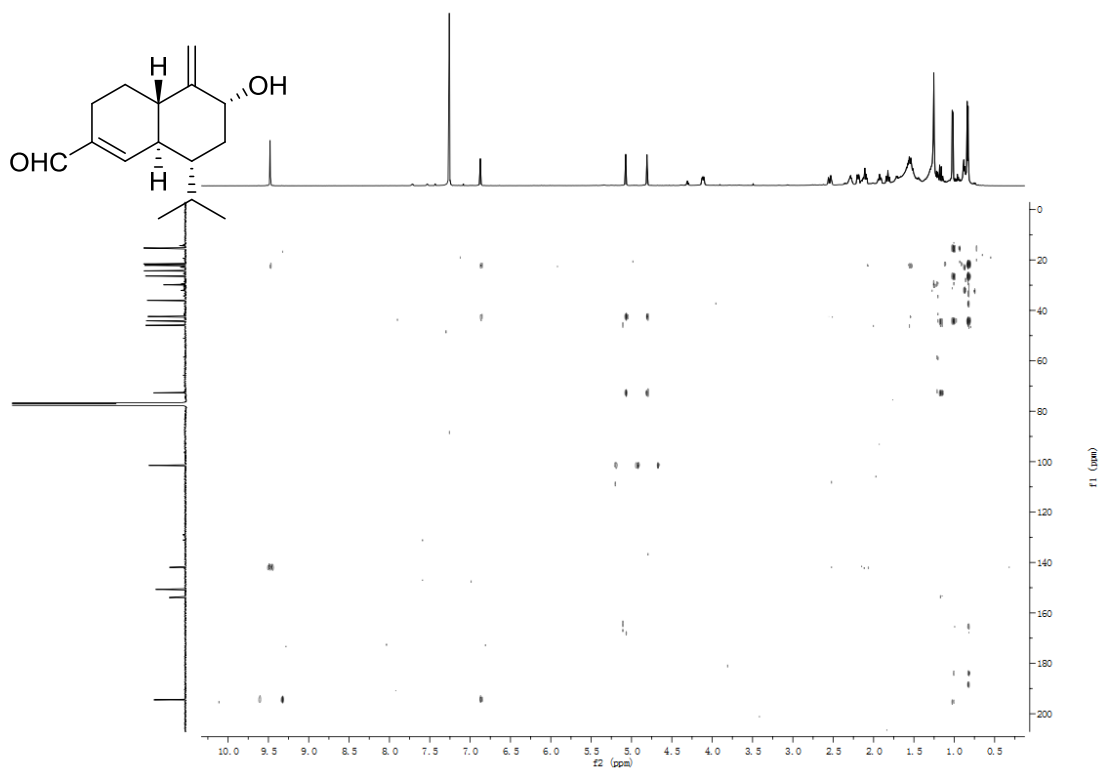

Figure S45. NOESY spectrum of compound **5** in CDCl<sub>3</sub>

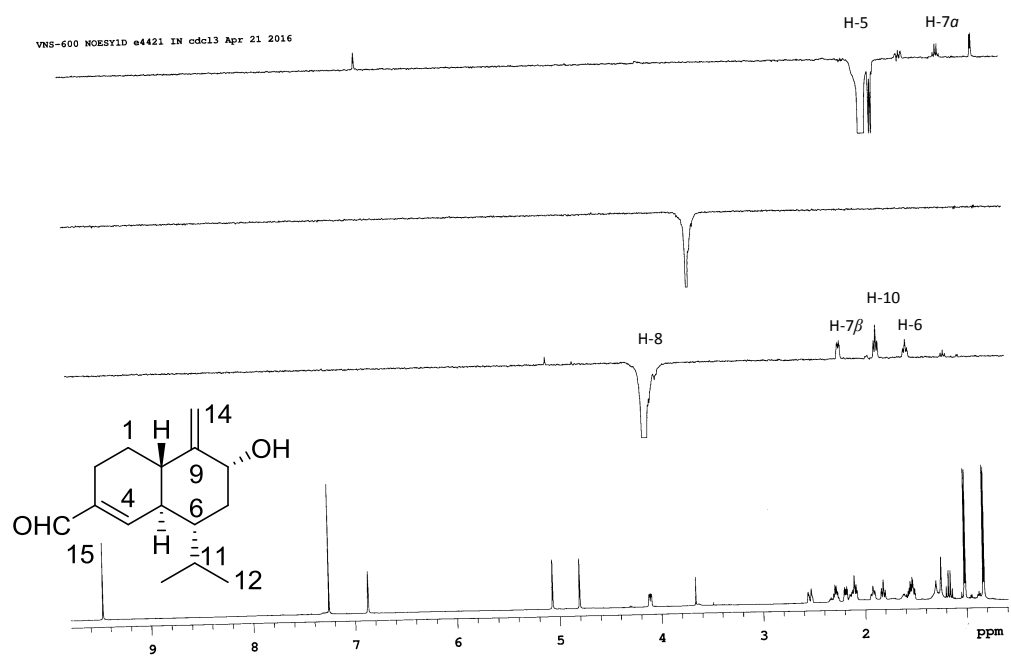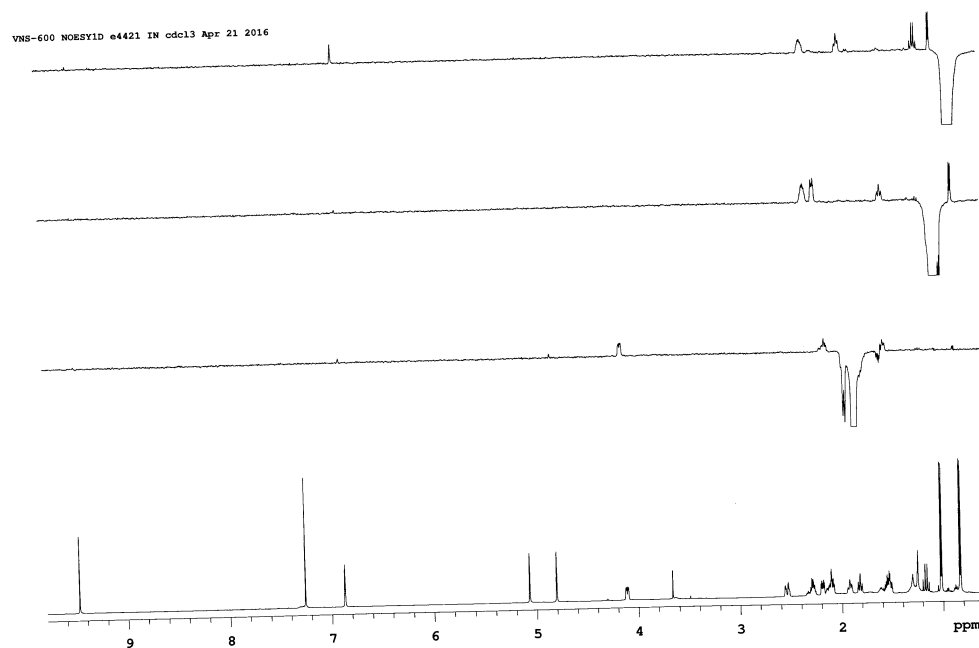

Figure S46. HRESIMS spectrum of compound 5

E4421 #1404 RT: 4.74 AV: 1 NL: 5.25E6  
T: FTMS + c ESI Full ms [100.00-1000.00]

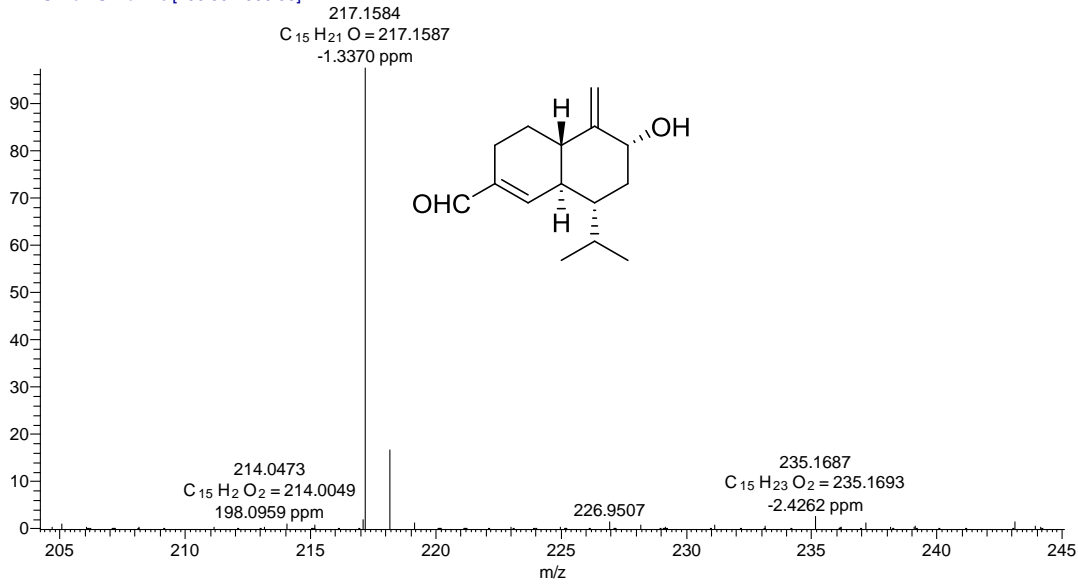

Figure S47. IR spectrum of compound 5

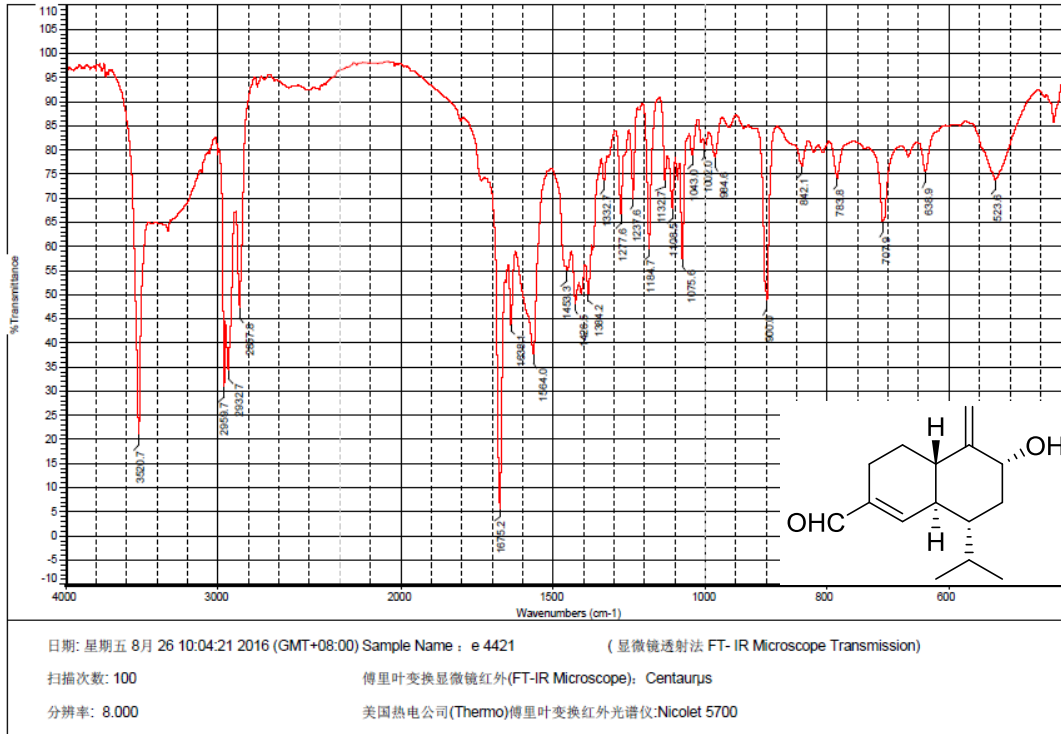

Figure S48. CD spectrum of compound 5

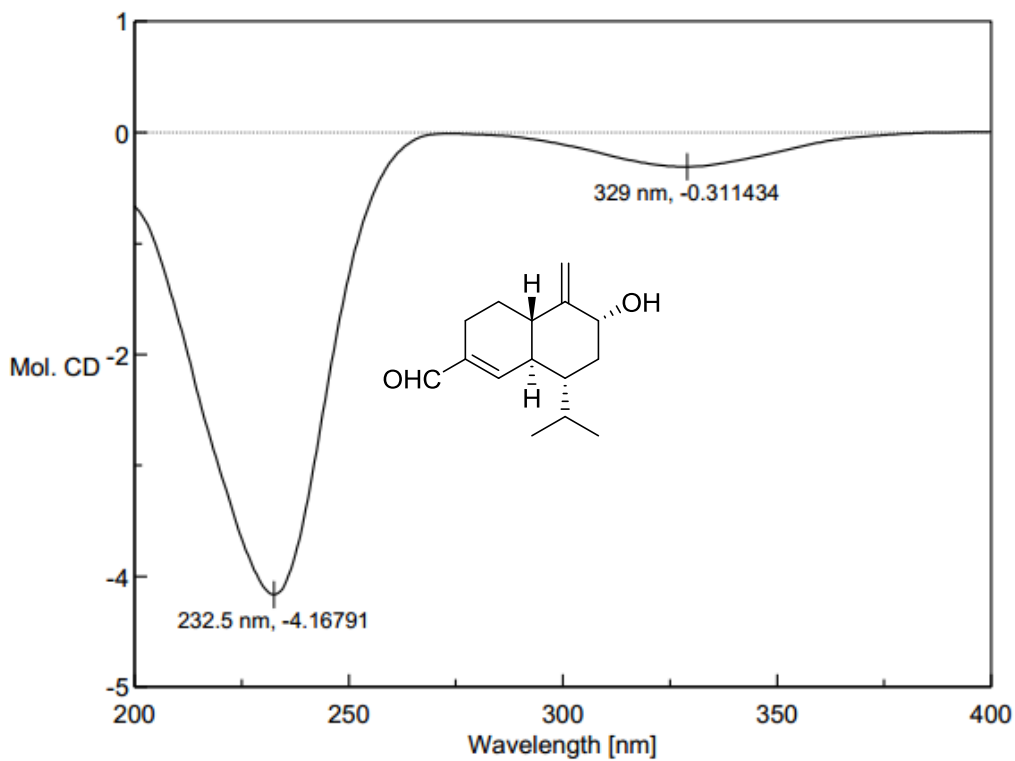

[Comment]  
Sample Name e4421

Figure S49. <sup>1</sup>H NMR spectrum of compound 6 in CDCl<sub>3</sub>

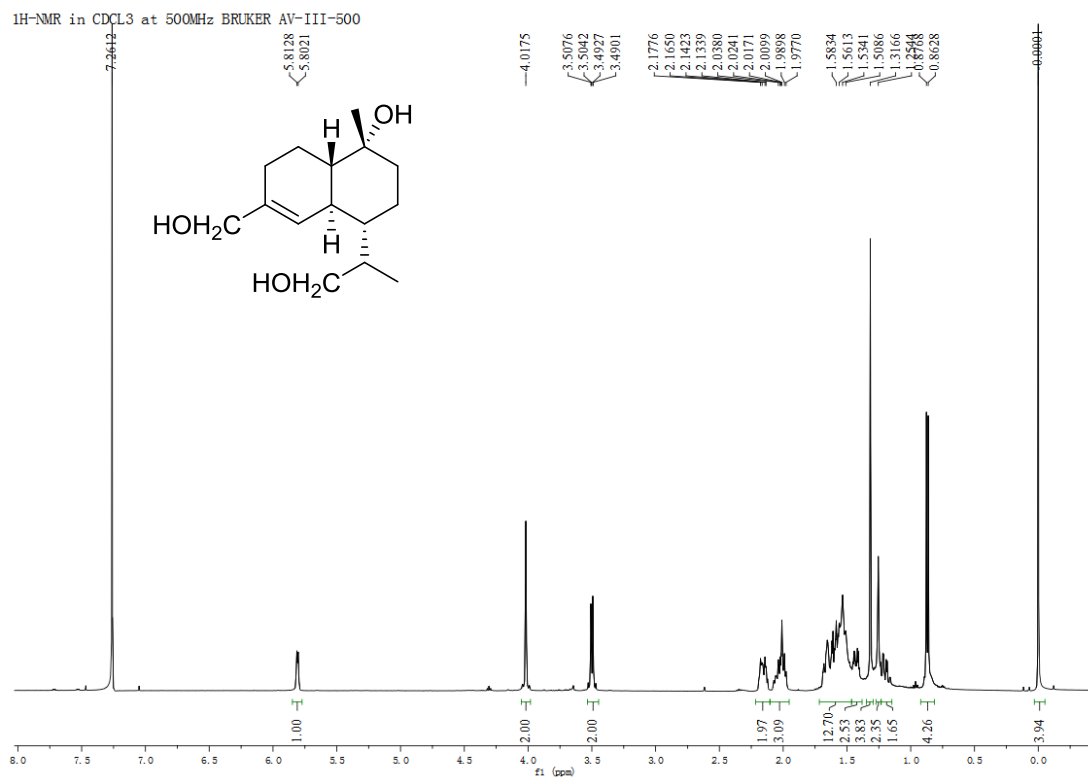

Figure S50.  $^{13}\text{C}$  NMR spectrum of compound **6** in  $\text{CDCl}_3$

$^{13}\text{C}$ -NMR IN  $\text{CDCl}_3$  at 500MHz BRUKER AV-III-500

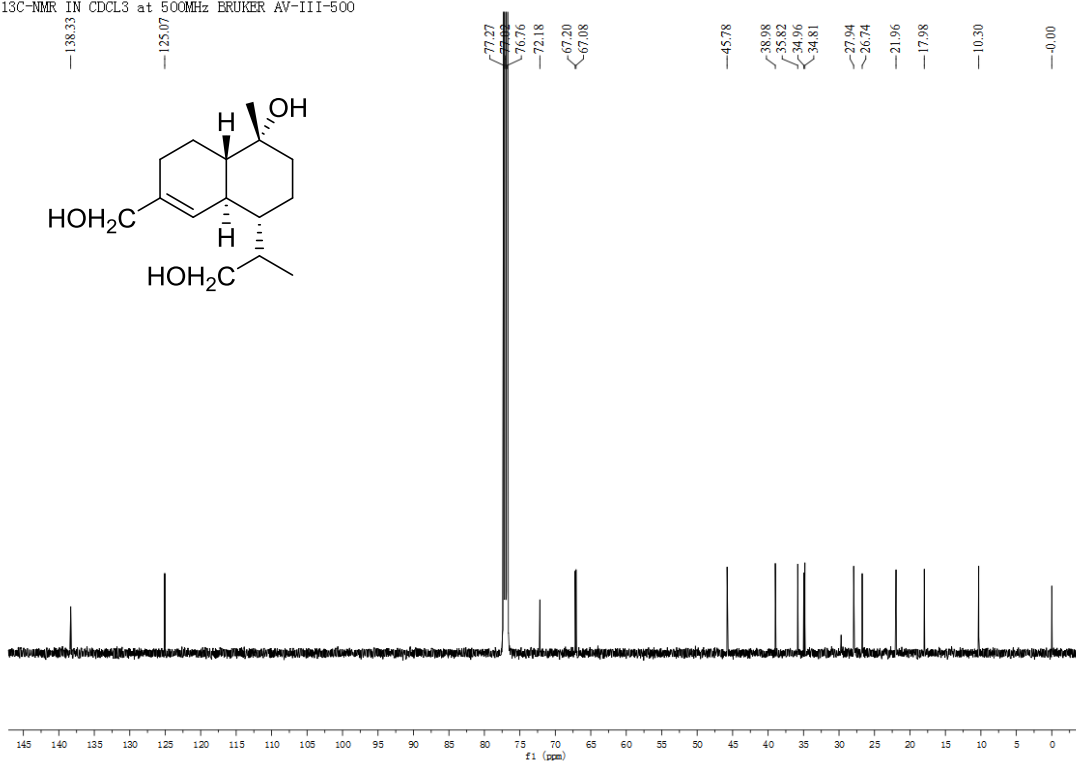

Figure S51. DEPT spectrum of compound **6** in  $\text{CDCl}_3$

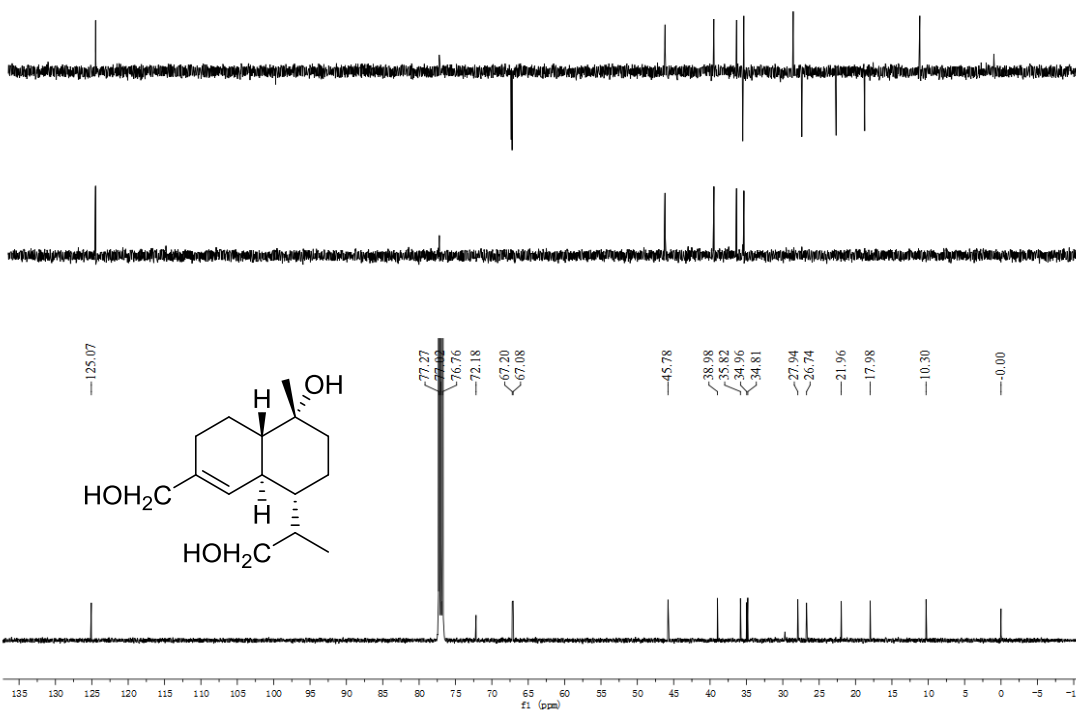

Figure S52. HSQC spectrum of compound **6** in CDCl<sub>3</sub>

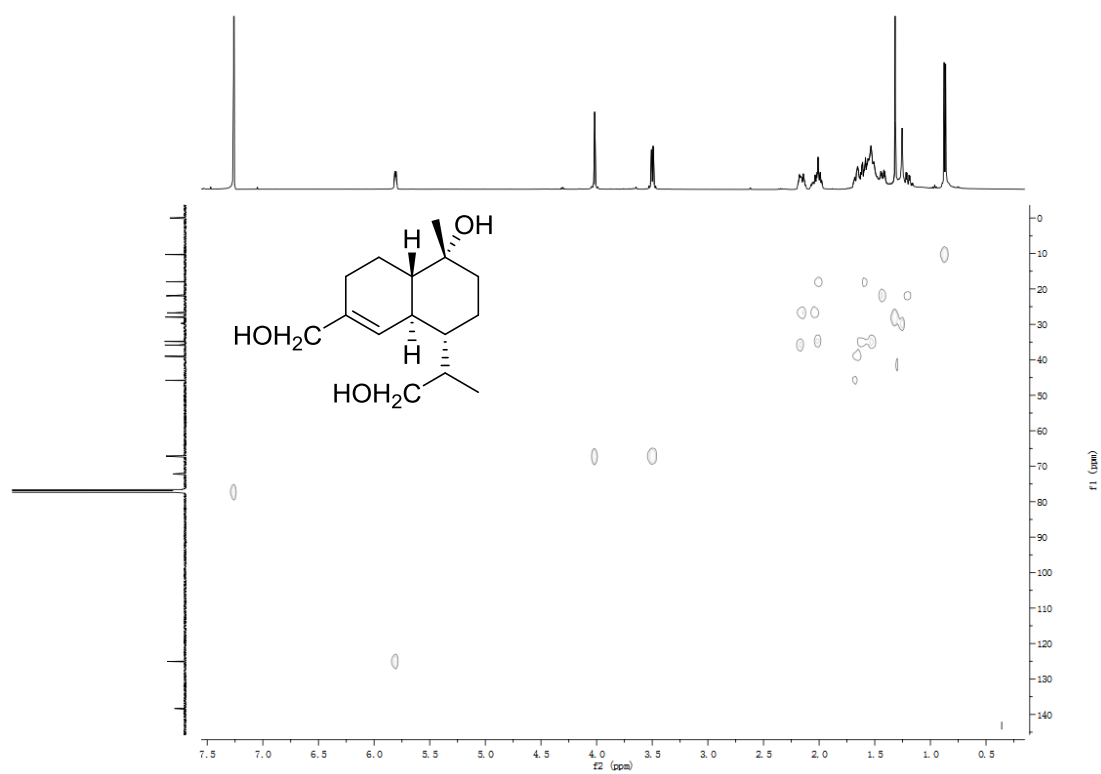

Figure S53. <sup>1</sup>H-<sup>1</sup>H COSY spectrum of compound **6** in CDCl<sub>3</sub>

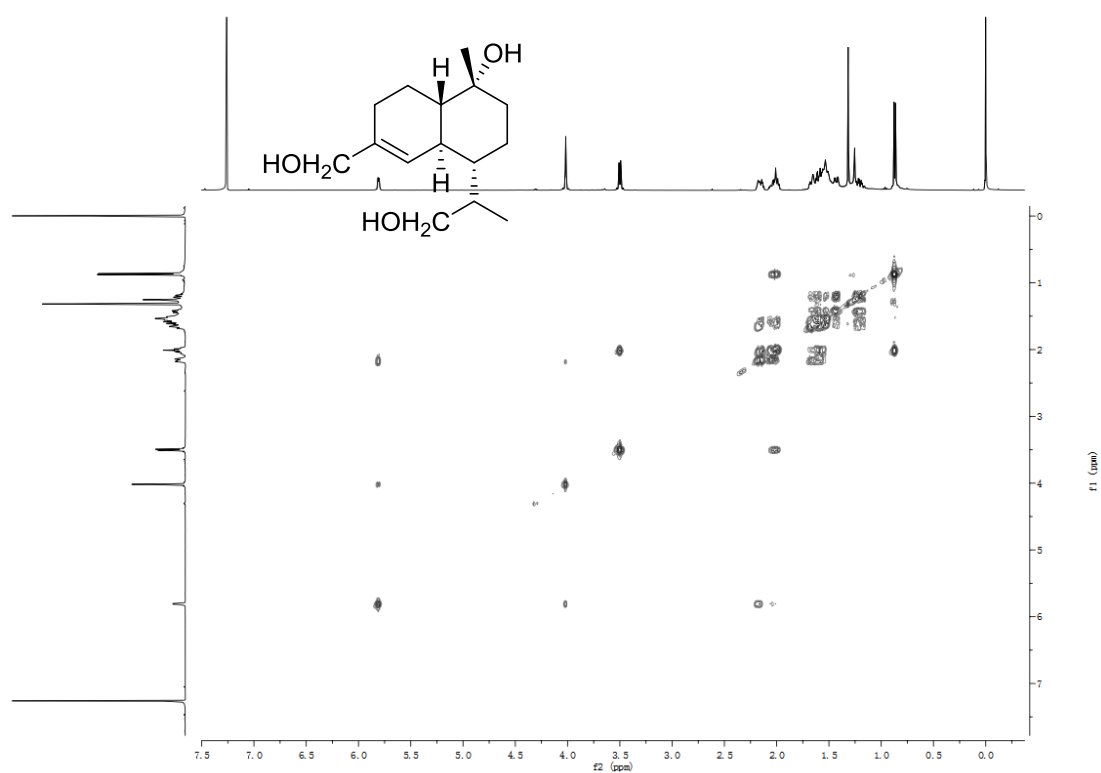

Figure S54. HMBC spectrum of compound 6 in CDCl<sub>3</sub>

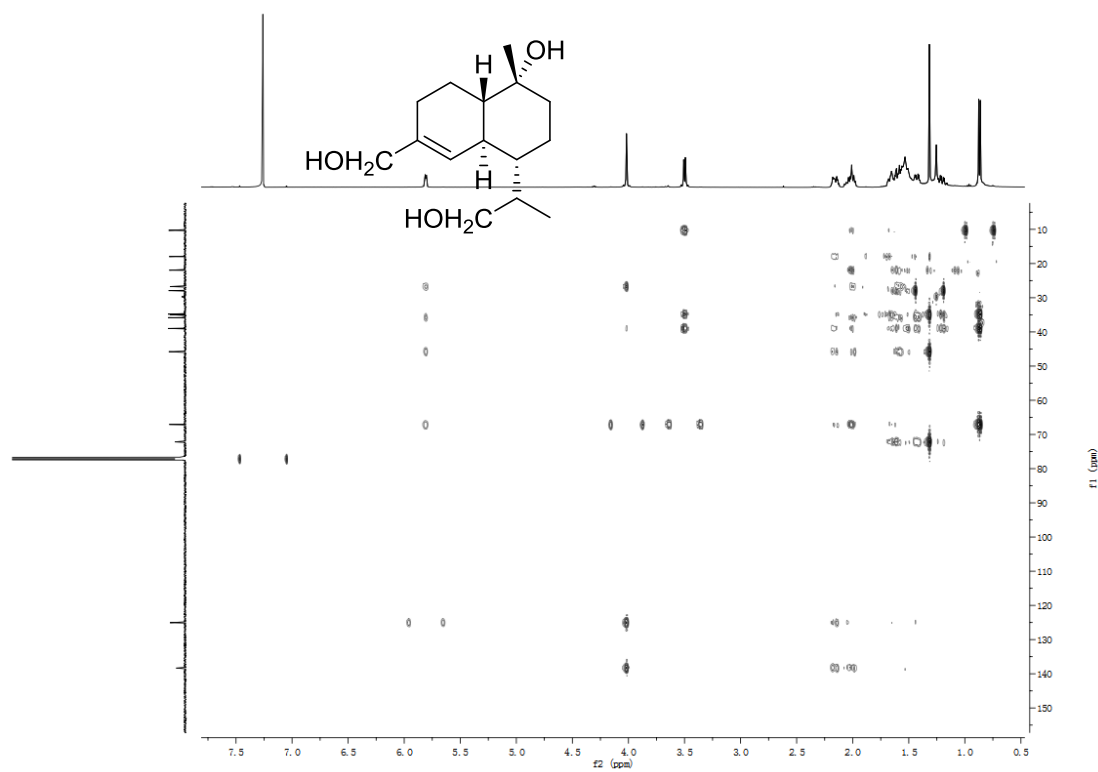

Figure S55. NOESY spectrum of compound 6 in CDCl<sub>3</sub>

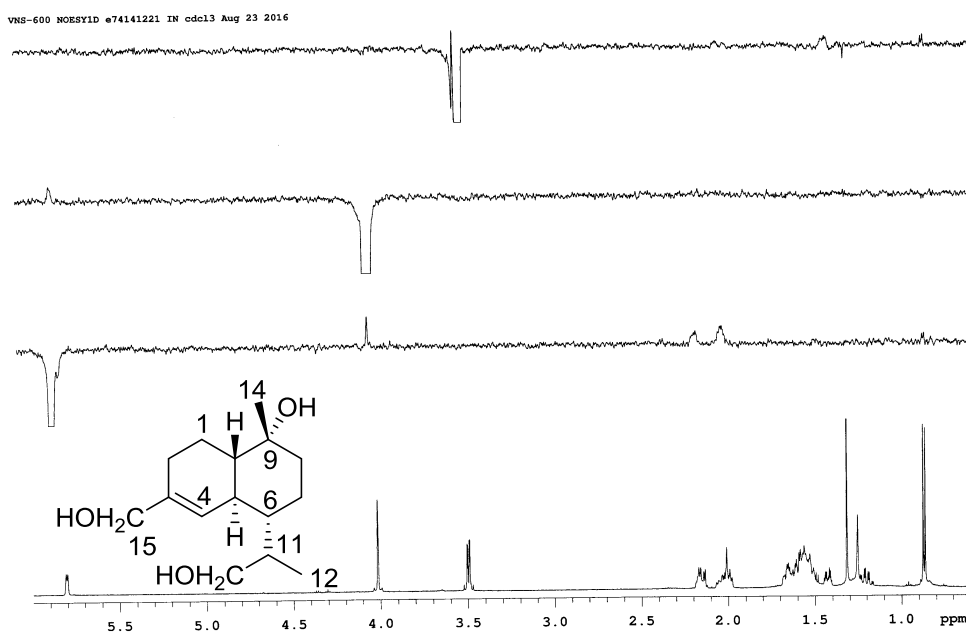



VNS-600 NOESY1D e74141221 IN cdc13 Aug 23 2016

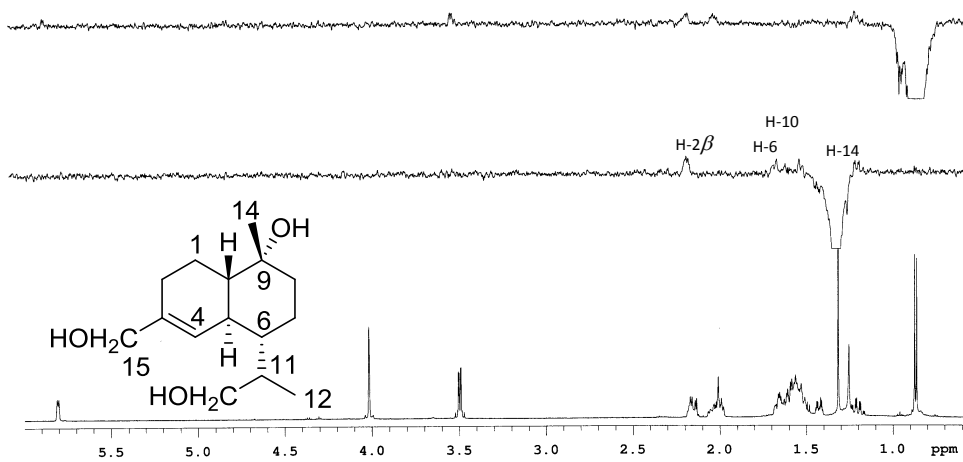

VNS-600 NOESY1D e74141221 IN cdc13 Aug 25 2016

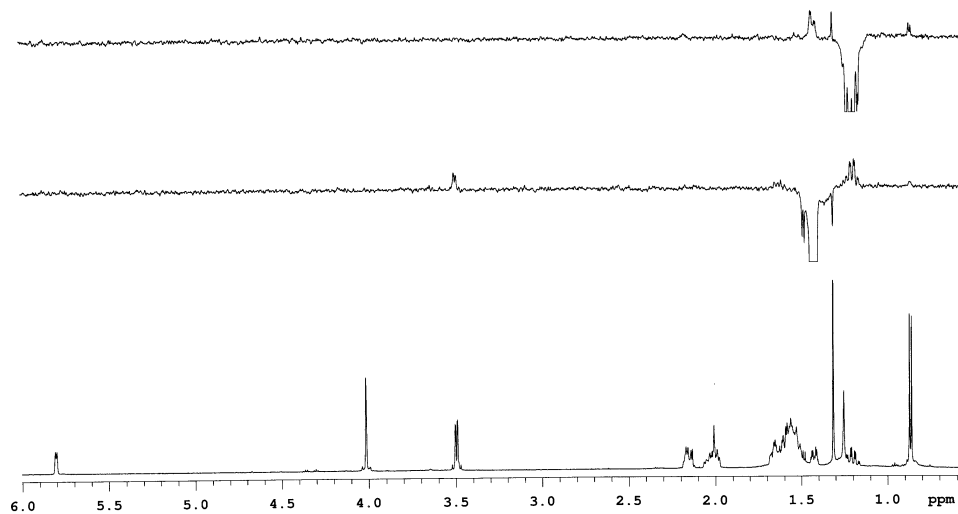

Figure S56. HRESIMS spectrum of compound 6

E74141221 #836 RT: 2.94 AV: 1 NL: 6.79E7  
T: FTMS + c ESI Full ms [100.00-1000.00]

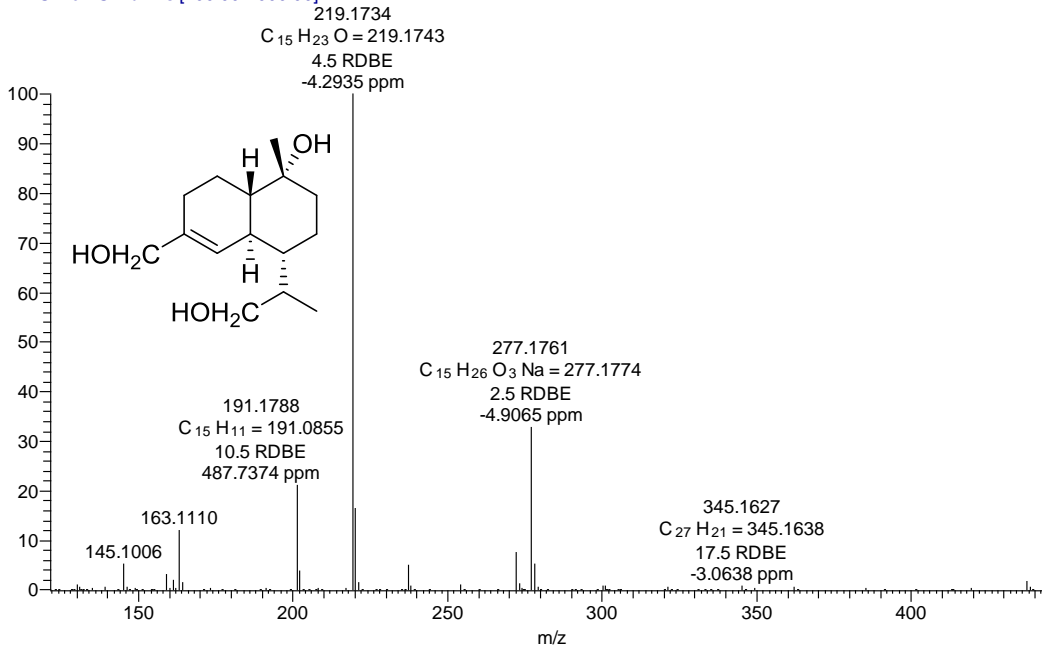

Figure S57. IR spectrum of compound 6

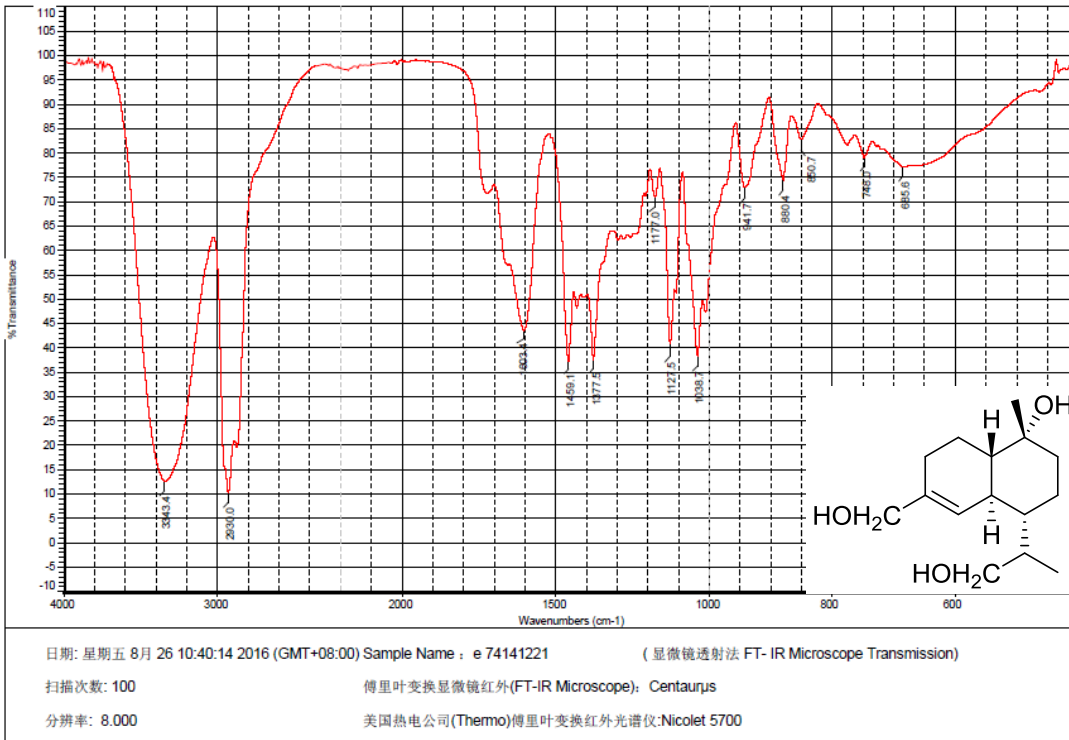

Figure S58.  $^1\text{H}$  NMR spectrum of compound **7** in  $\text{CDCl}_3$

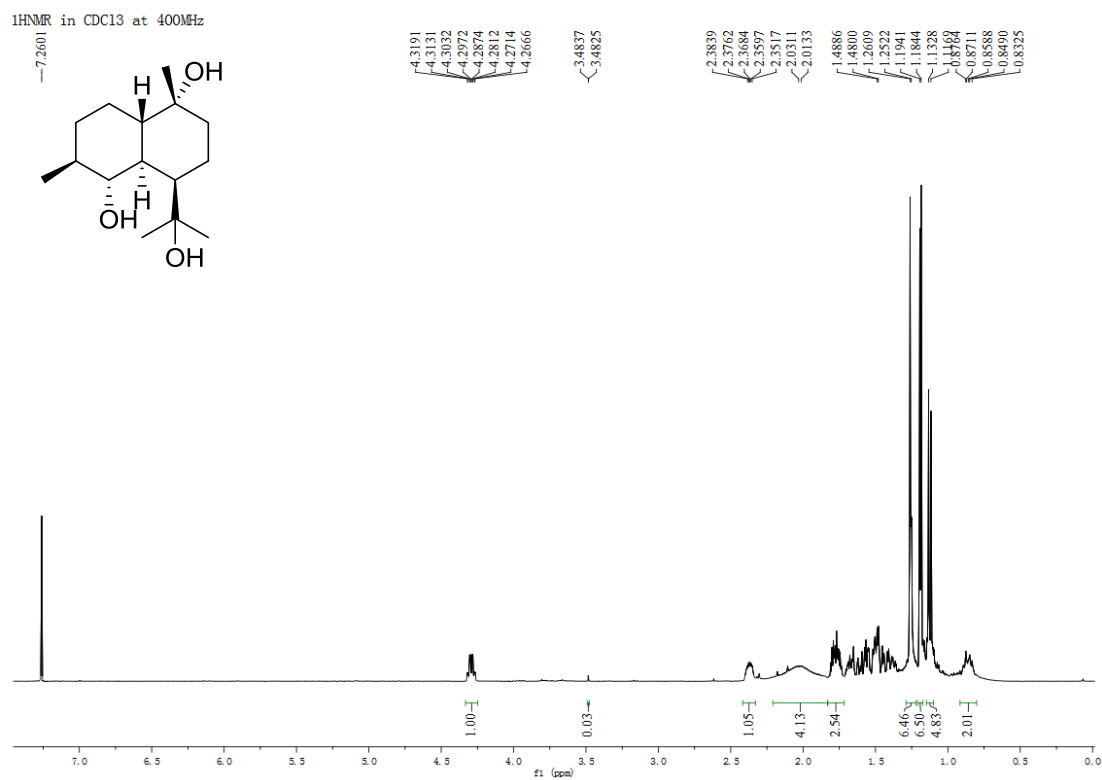

Figure S59.  $^{13}\text{C}$  NMR spectrum of compound **7** in  $\text{CDCl}_3$

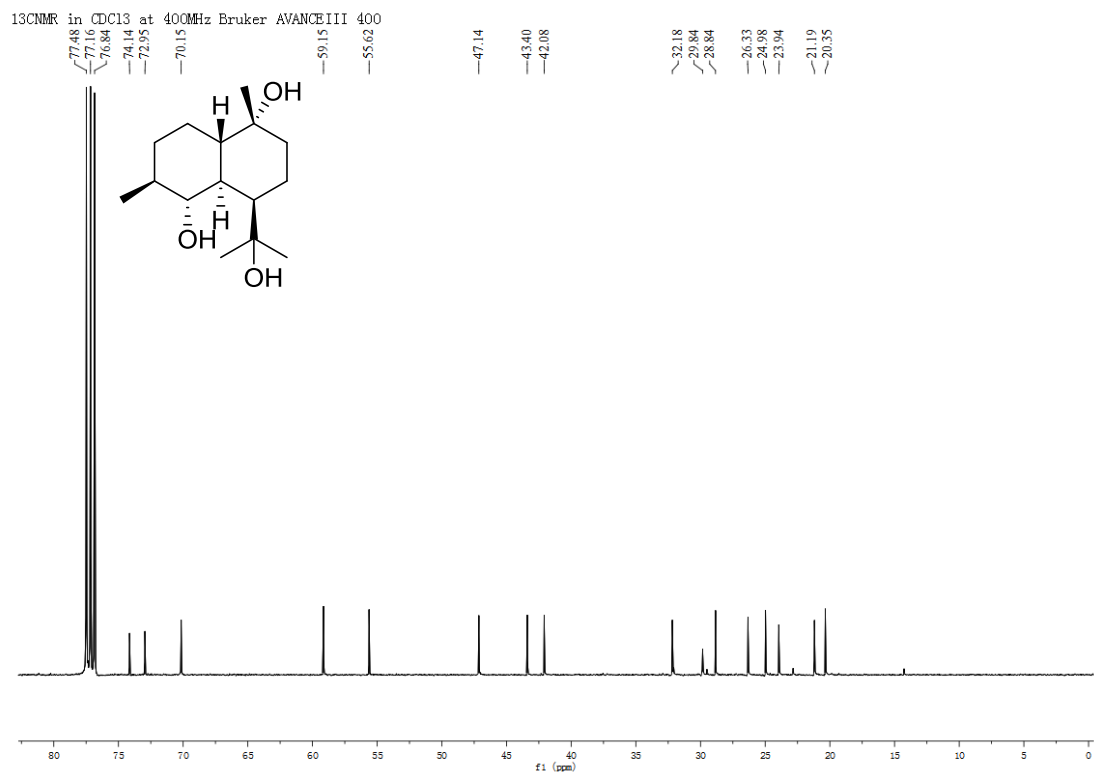

Figure S60. DEPT spectrum of compound **7** in CDCl<sub>3</sub>

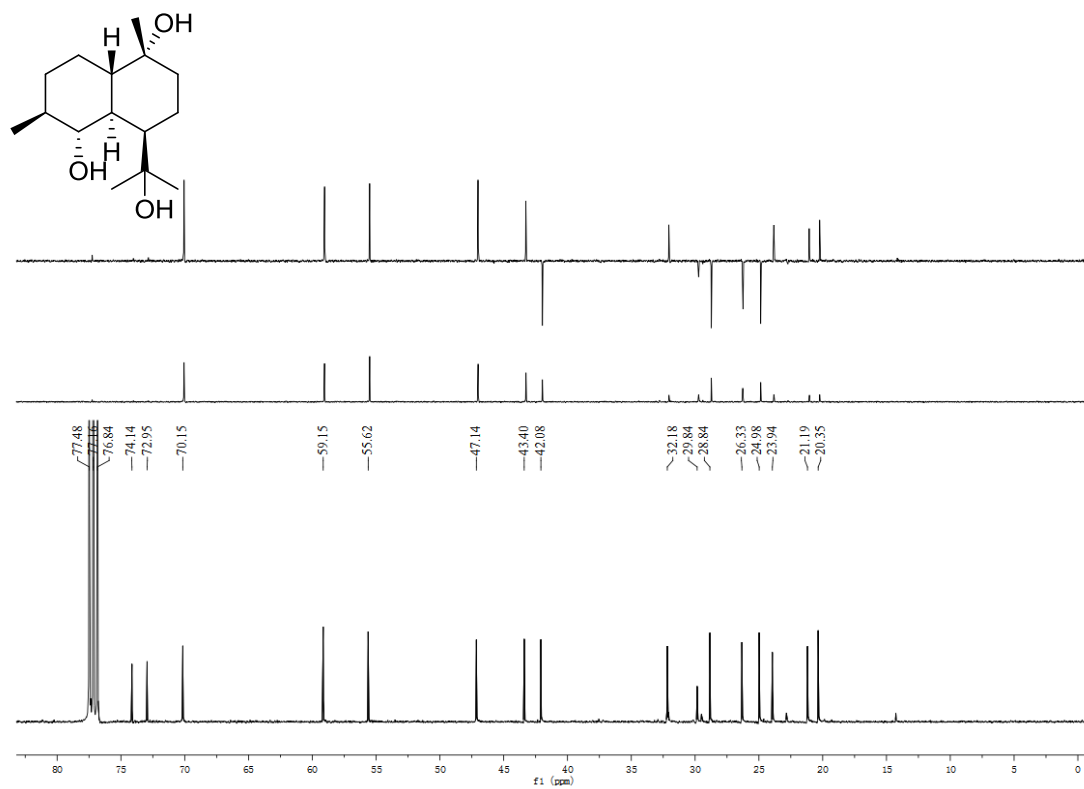

Figure S61. HSQC spectrum of compound **7** in CDCl<sub>3</sub>

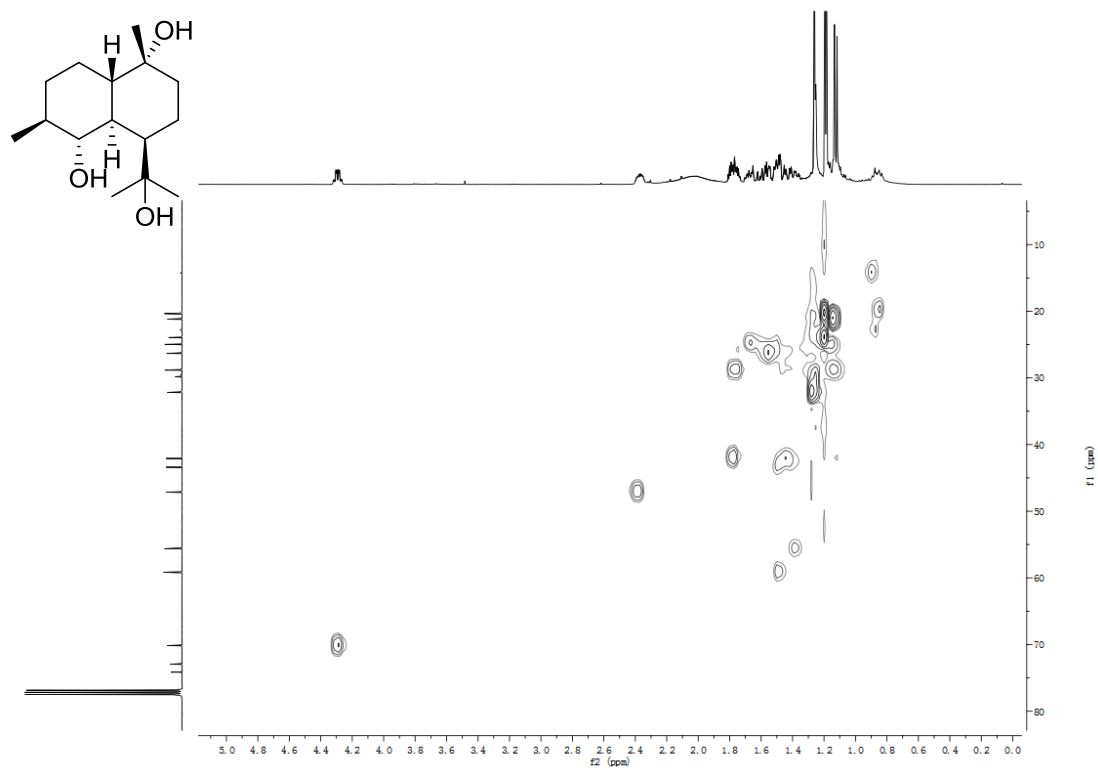

Figure S62.  $^1\text{H}$ - $^1\text{H}$  COSY spectrum of compound **7** in  $\text{CDCl}_3$

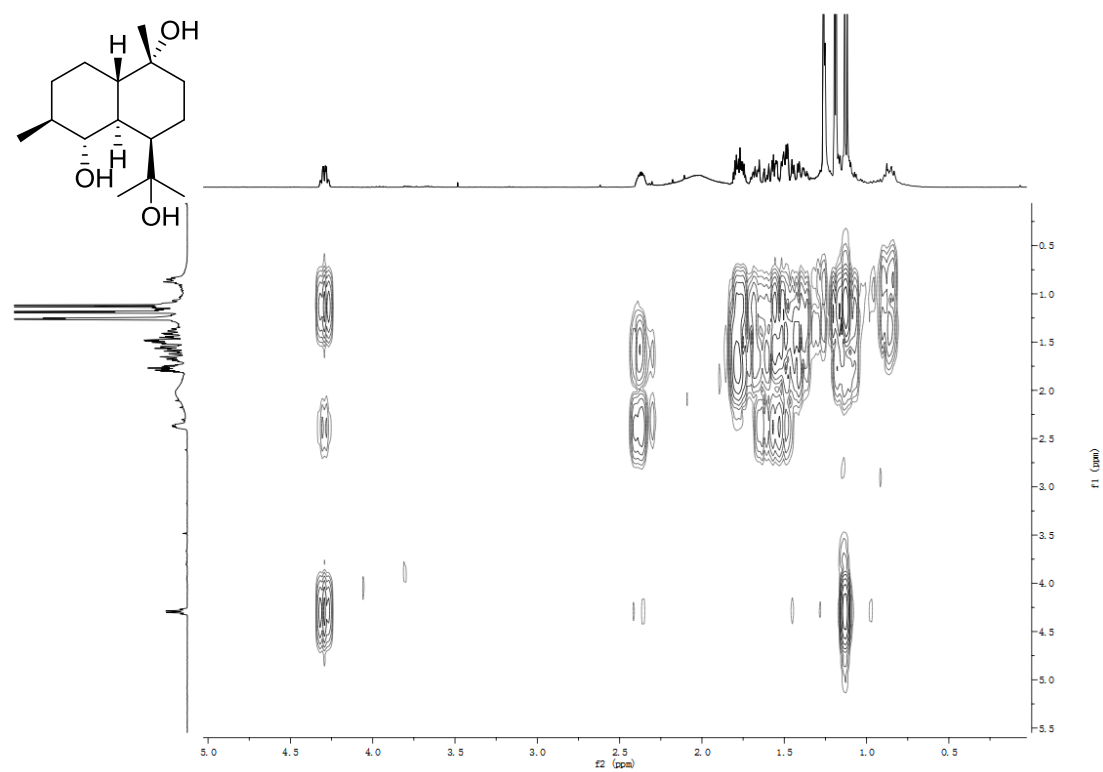

Figure S63. HMBC spectrum of compound **7** in  $\text{CDCl}_3$

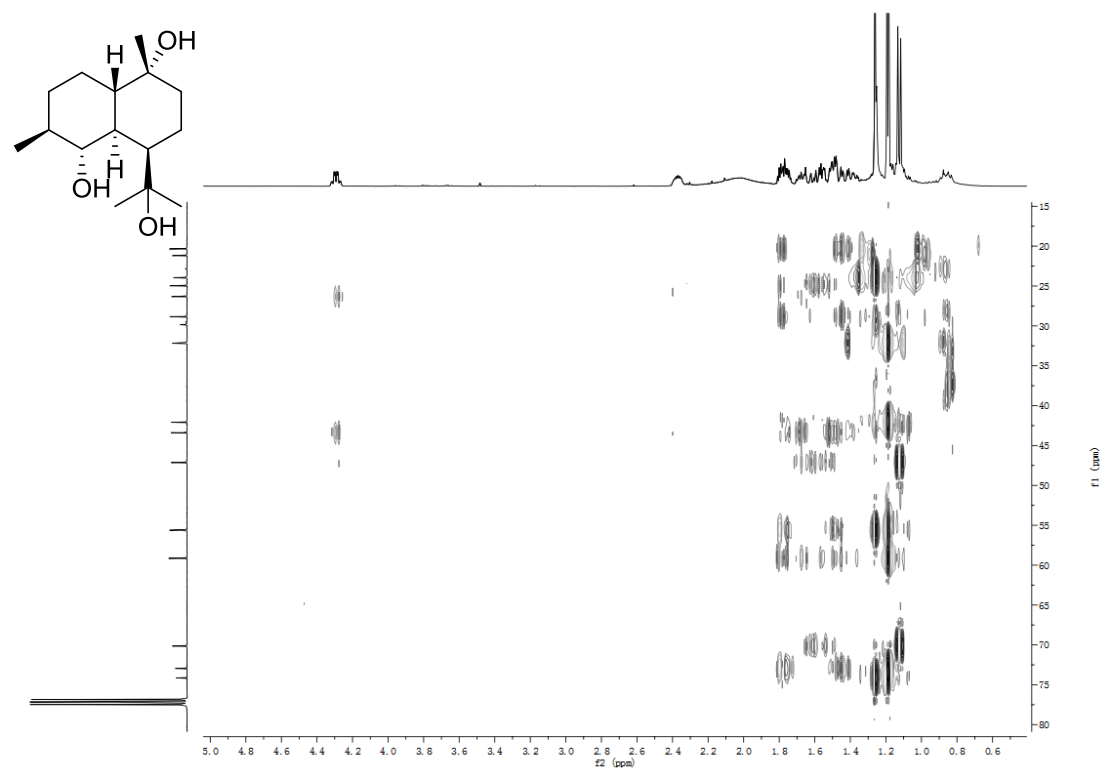

Figure S64. NOESY spectrum of compound 7 in CDCl<sub>3</sub>

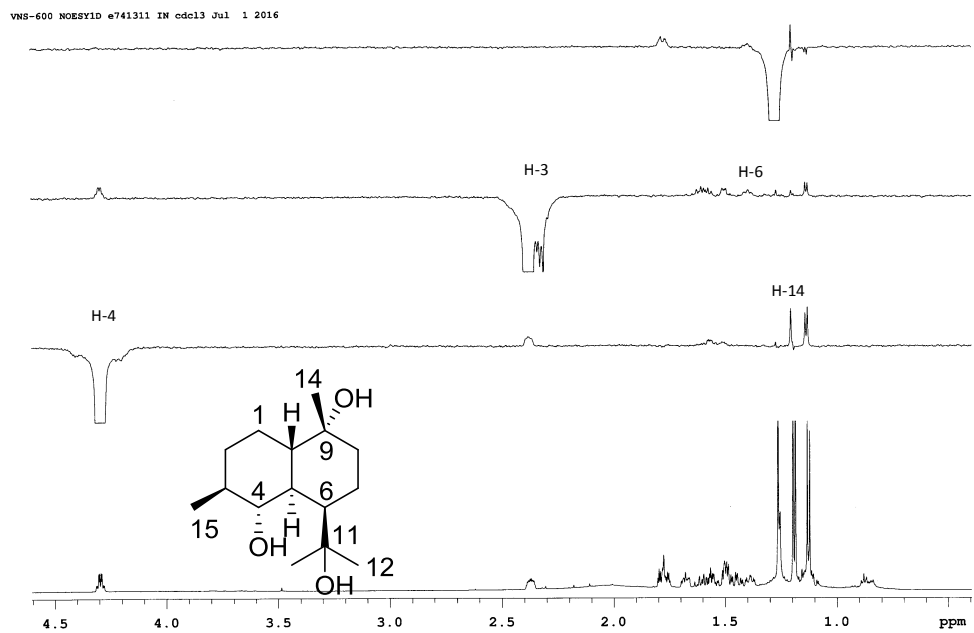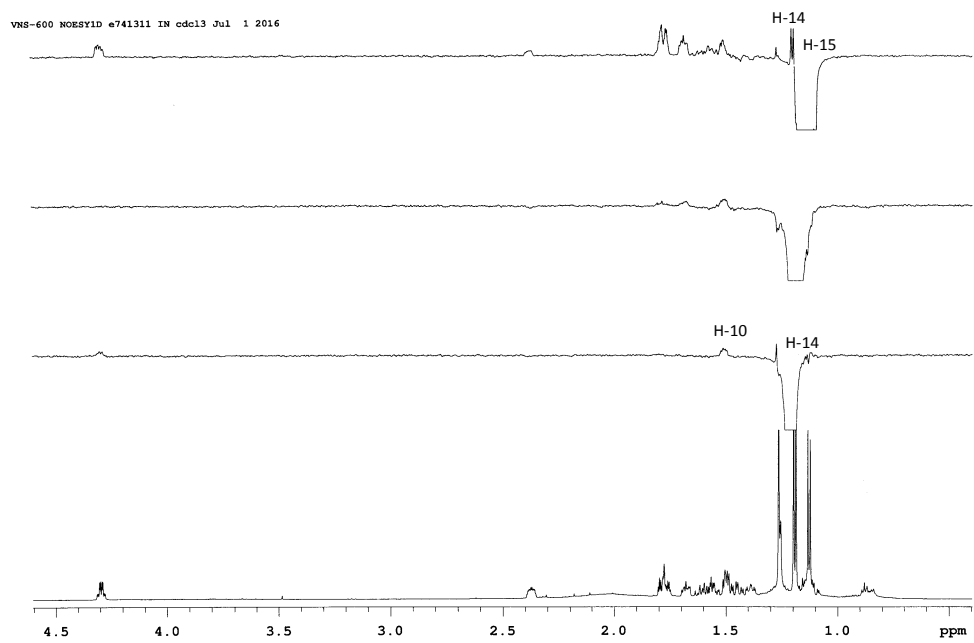

Figure S65. HRESIMS spectrum of compound 7

E741311 #793 RT: 2.68 AV: 1 NL: 2.78E7

T: FTMS + c ESI Full ms [100.00-1000.00]

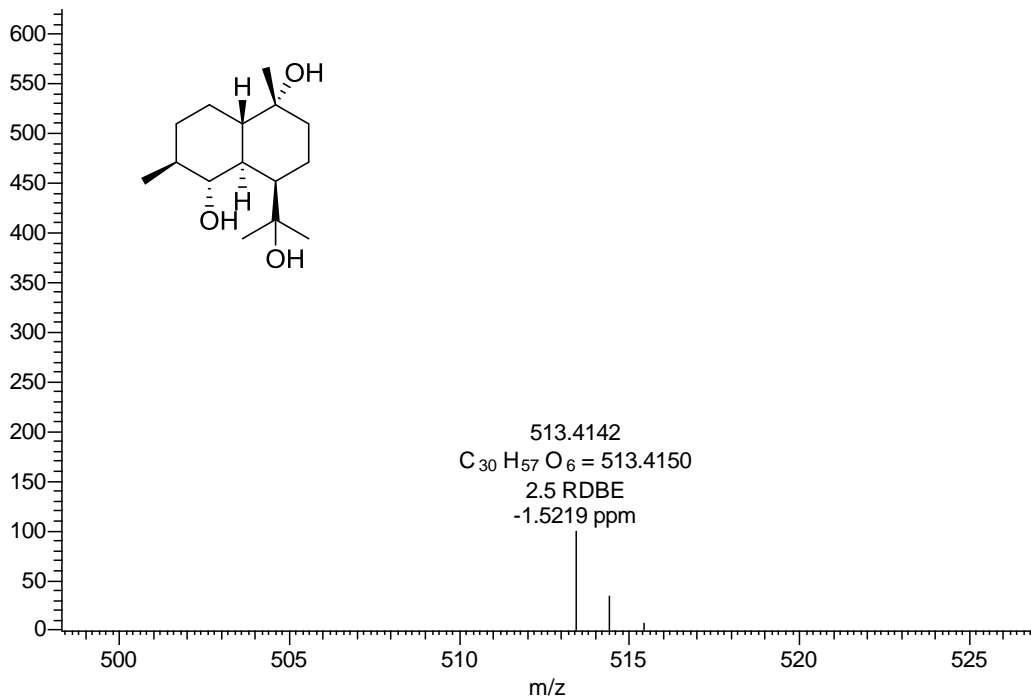

Figure S66. IR spectrum of compound 7

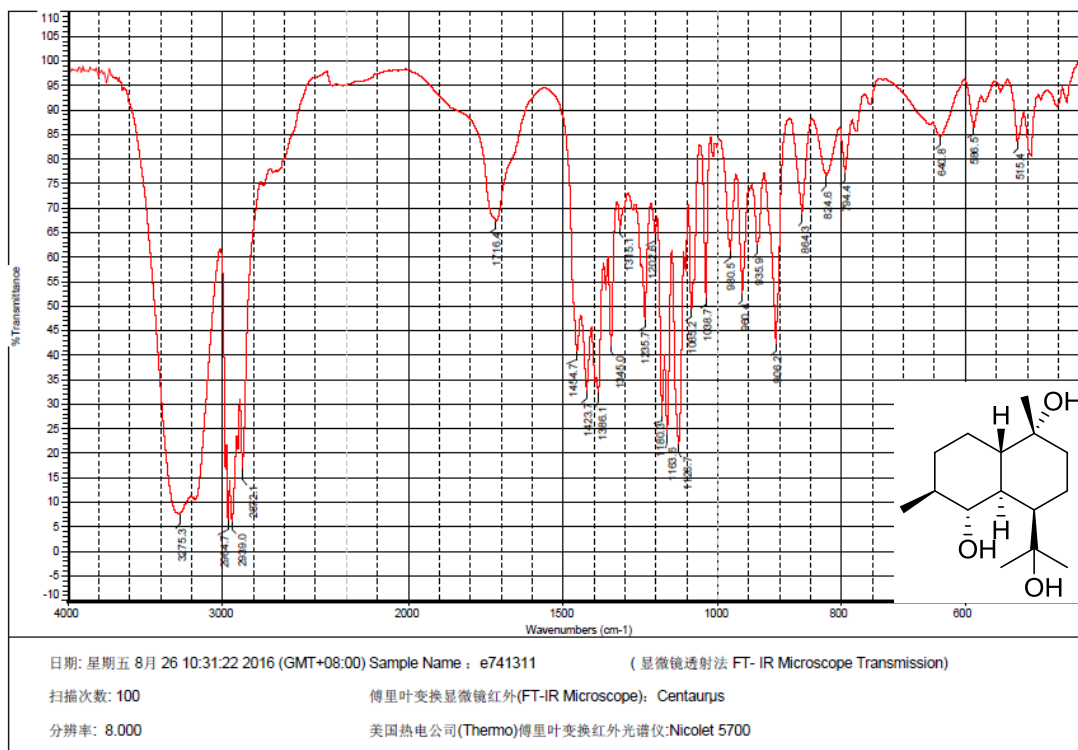

Figure S67.  $^1\text{H}$  NMR spectrum of compound 4-Benzoyl-ganodermanol G in  $\text{CDCl}_3$

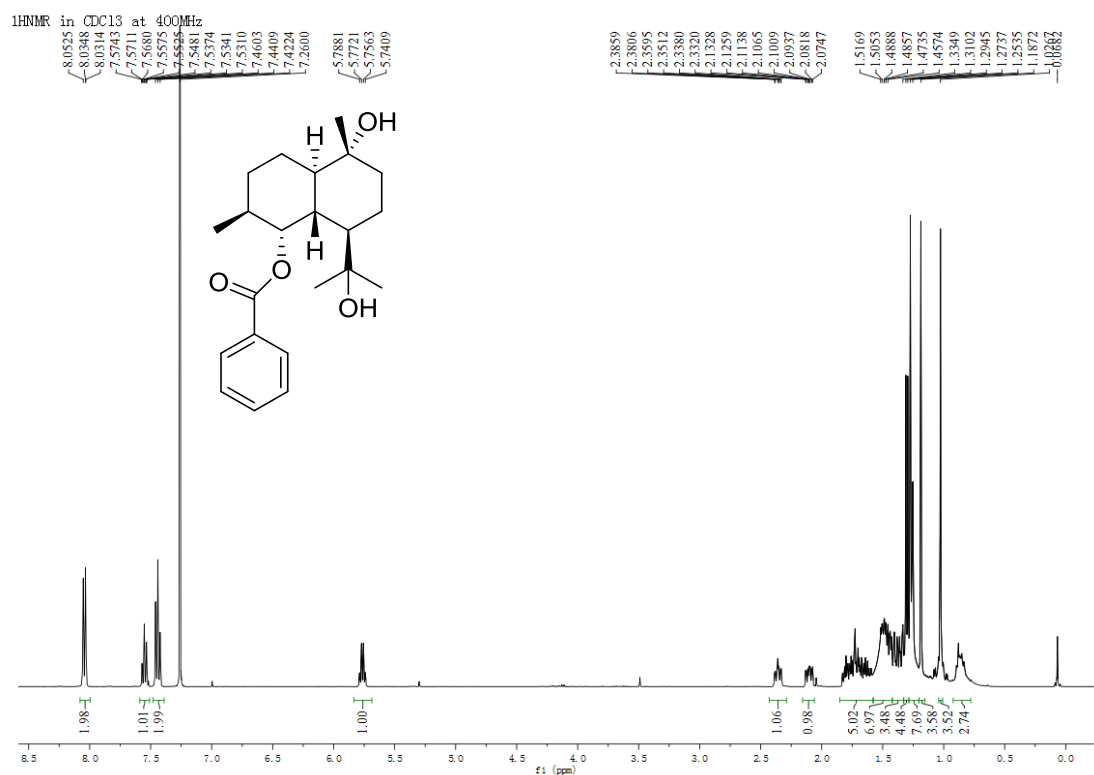

Figure S68.  $^{13}\text{C}$  NMR spectrum of compound 4-Benzoyl-ganodermanol H in  $\text{CDCl}_3$

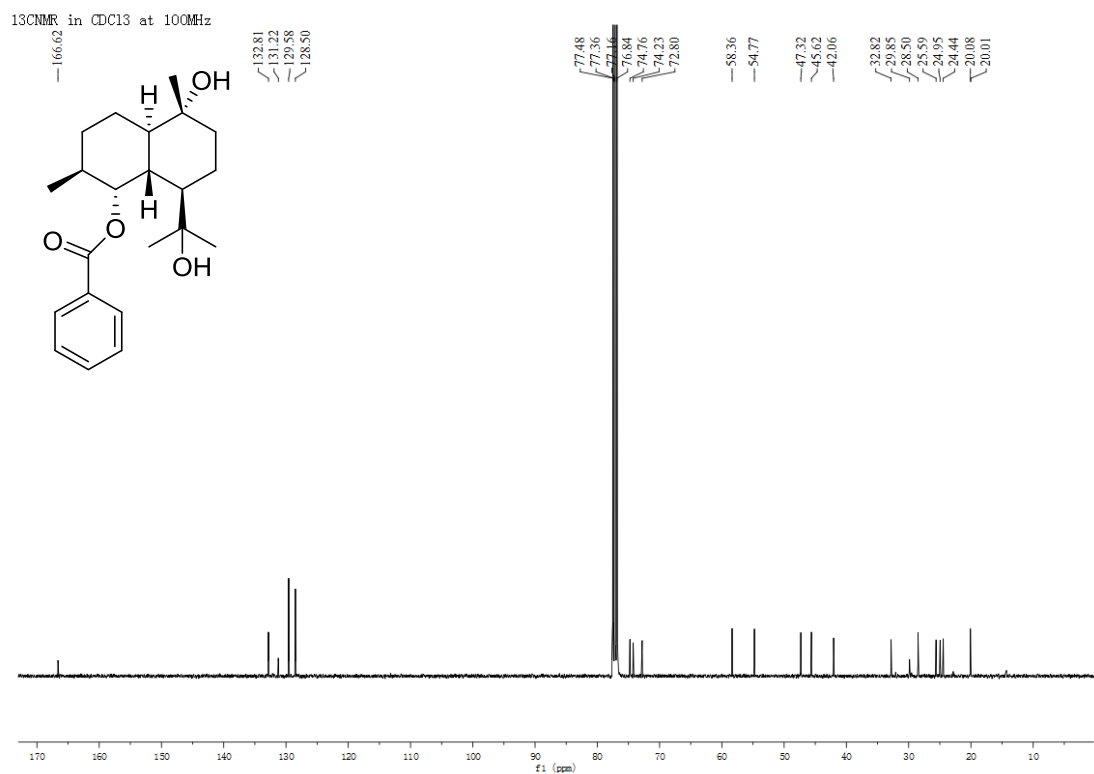



Figure S69. HMBC spectrum of compound 4-Benzoyl-ganodermanol G in CDCl<sub>3</sub>

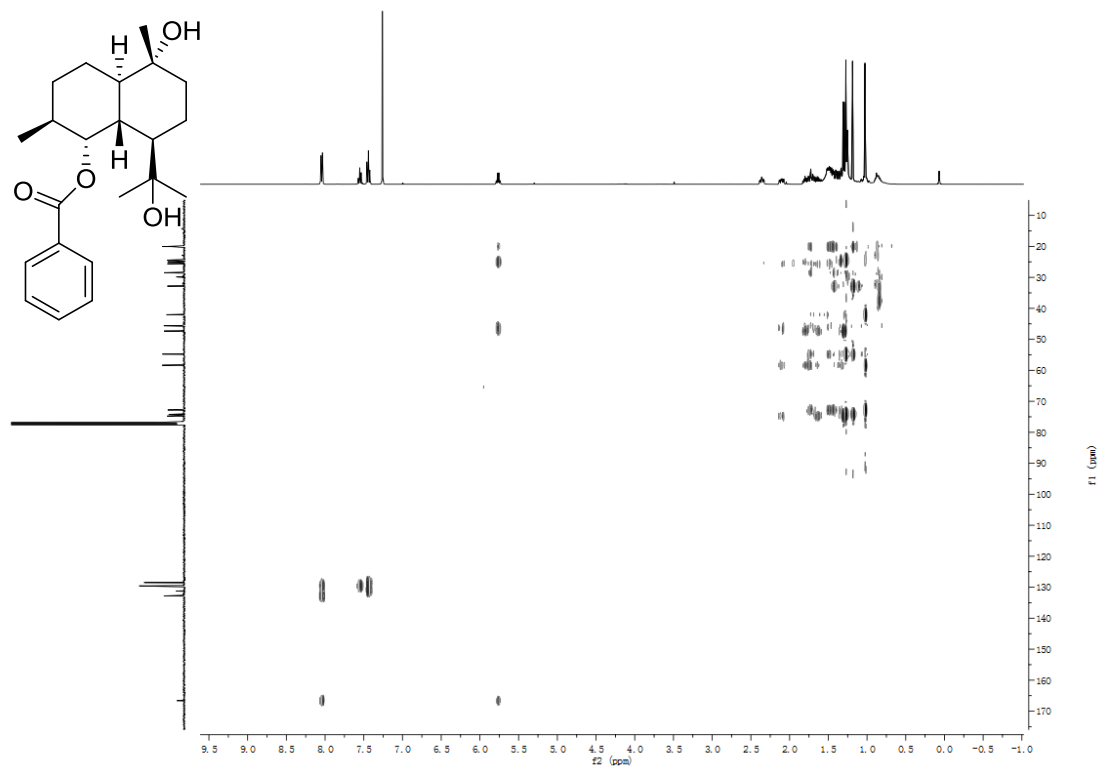

Figure S70. <sup>1</sup>H NMR spectrum of compound 8 in CDCl<sub>3</sub>

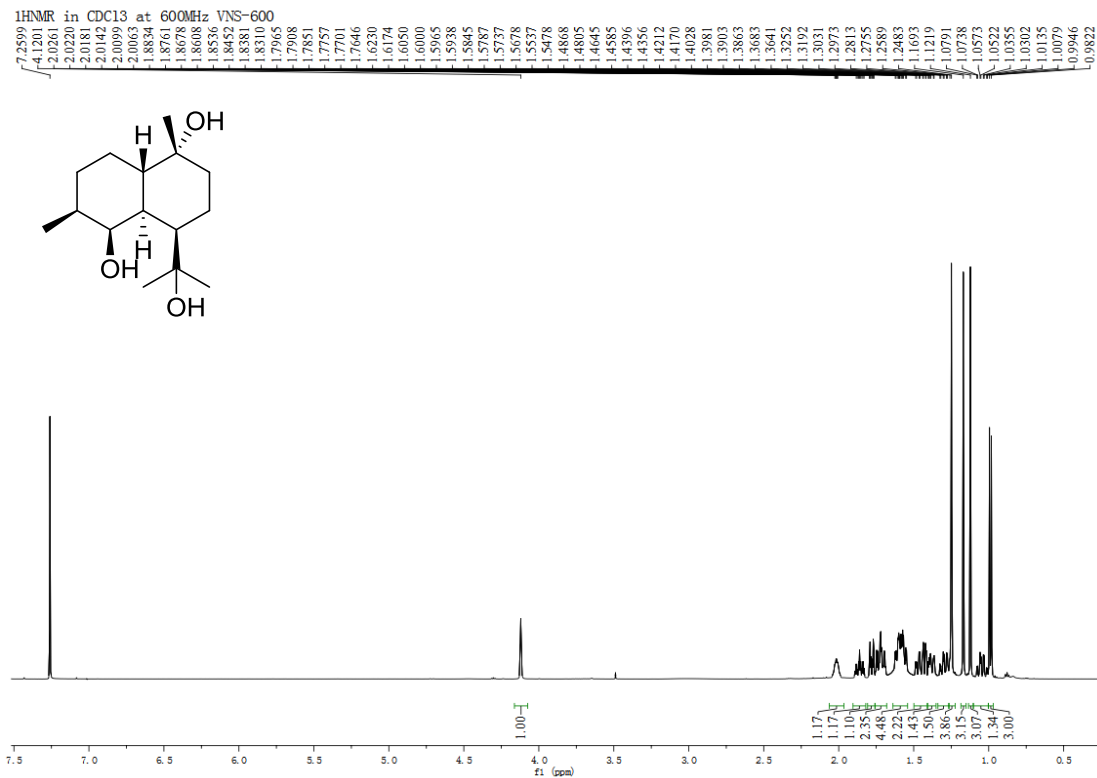

Figure S71.  $^{13}\text{C}$  NMR spectrum of compound **8** in  $\text{CDCl}_3$

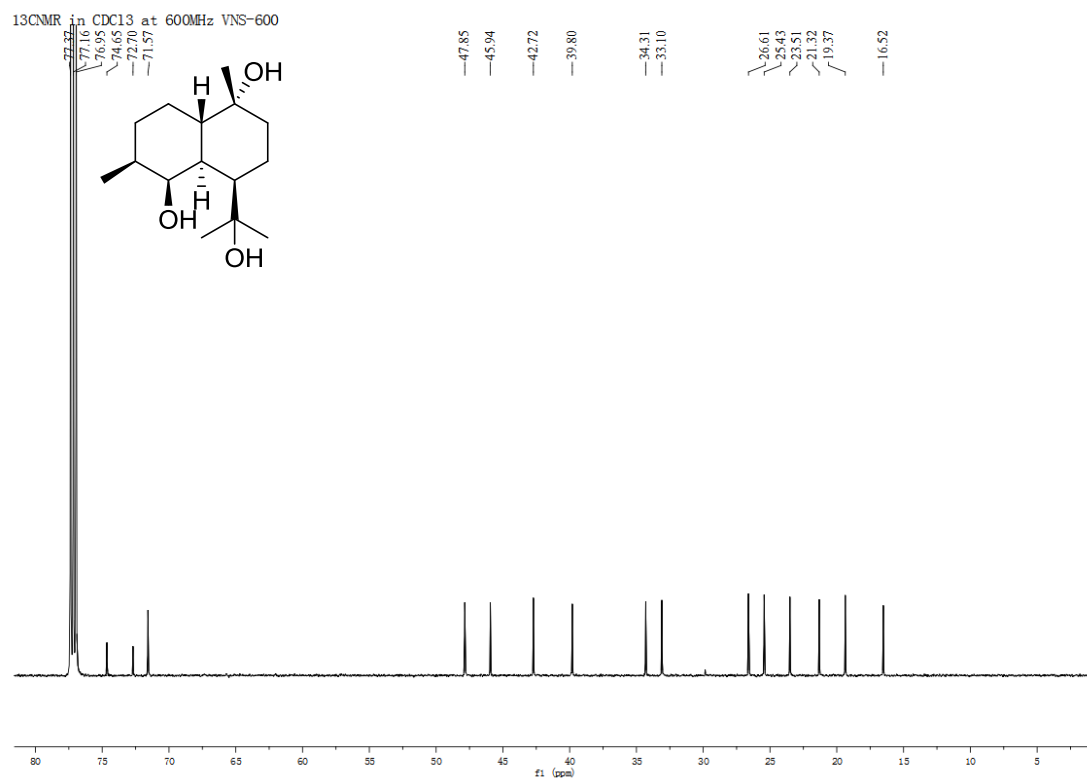

Figure S72. DEPT spectrum of compound **8** in  $\text{CDCl}_3$

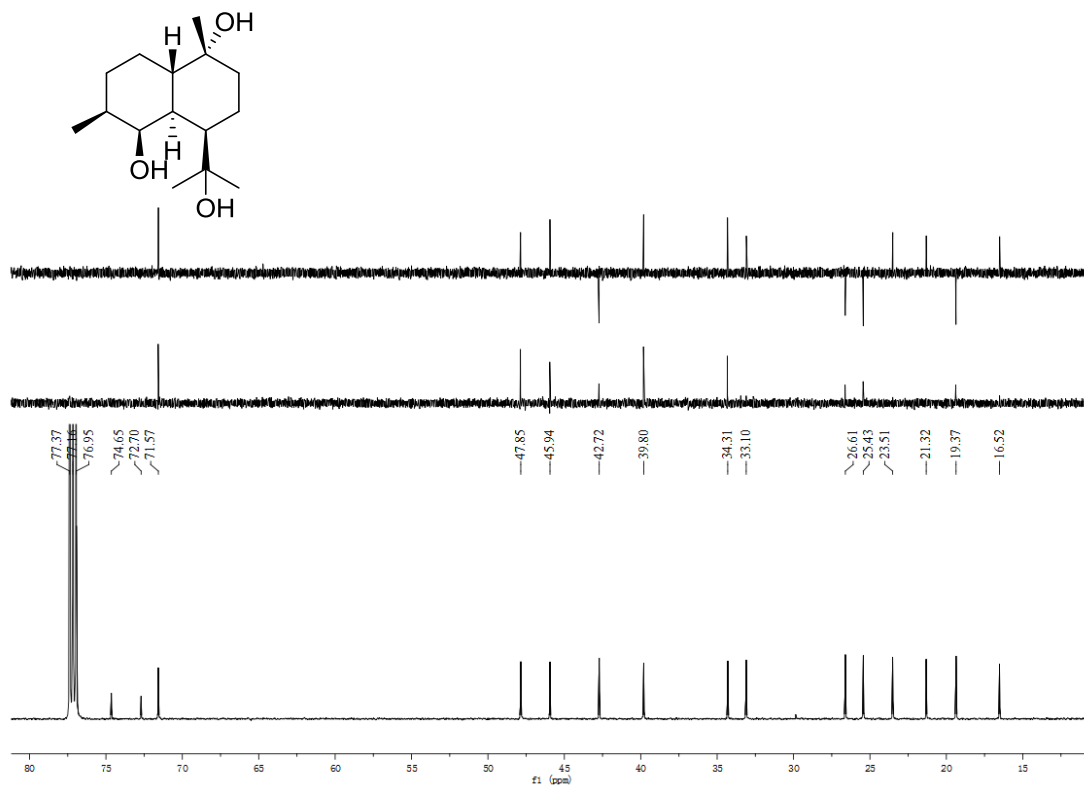

Figure S73. HSQC spectrum of compound **8** in CDCl<sub>3</sub>

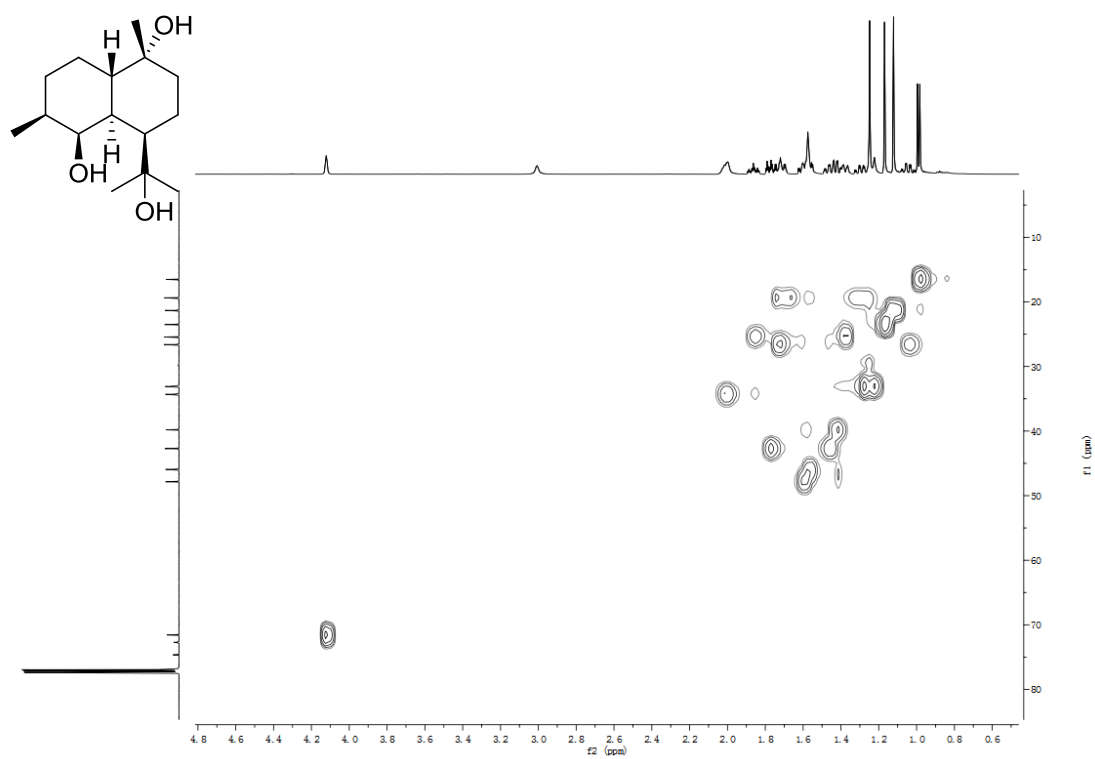

Figure S74. <sup>1</sup>H-<sup>1</sup>H COSY spectrum of compound **8** in CDCl<sub>3</sub>

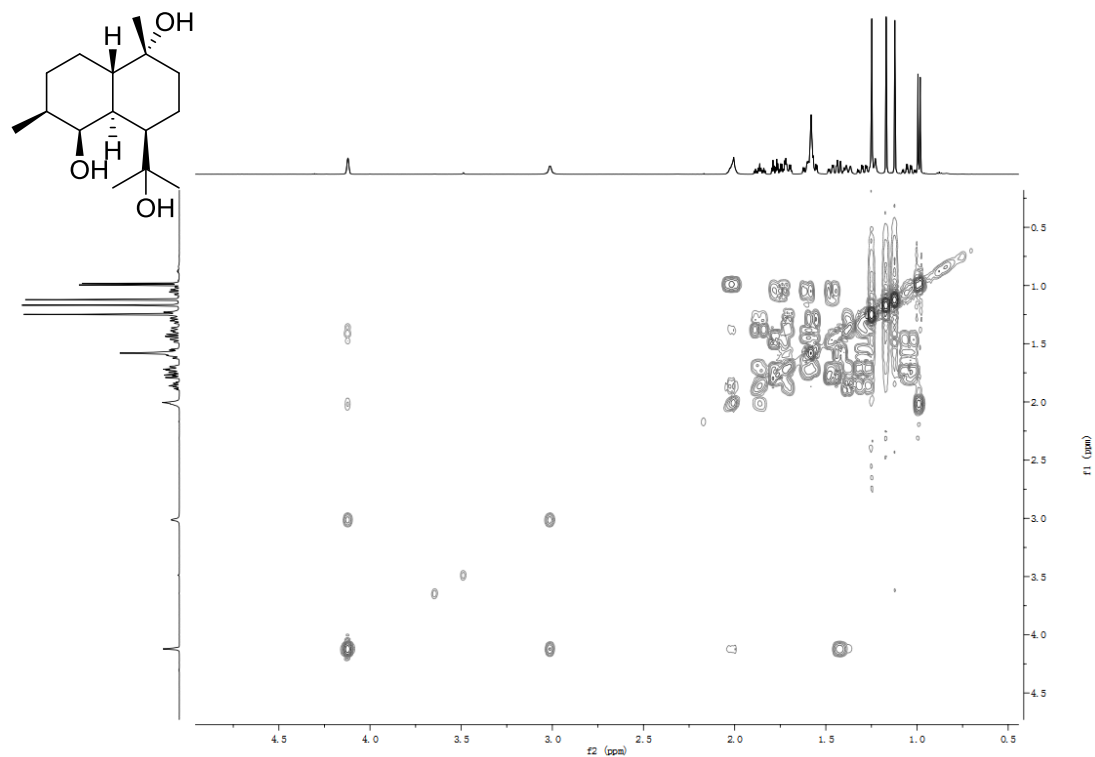

Figure S75. HMBC spectrum of compound **8** in CDCl<sub>3</sub>

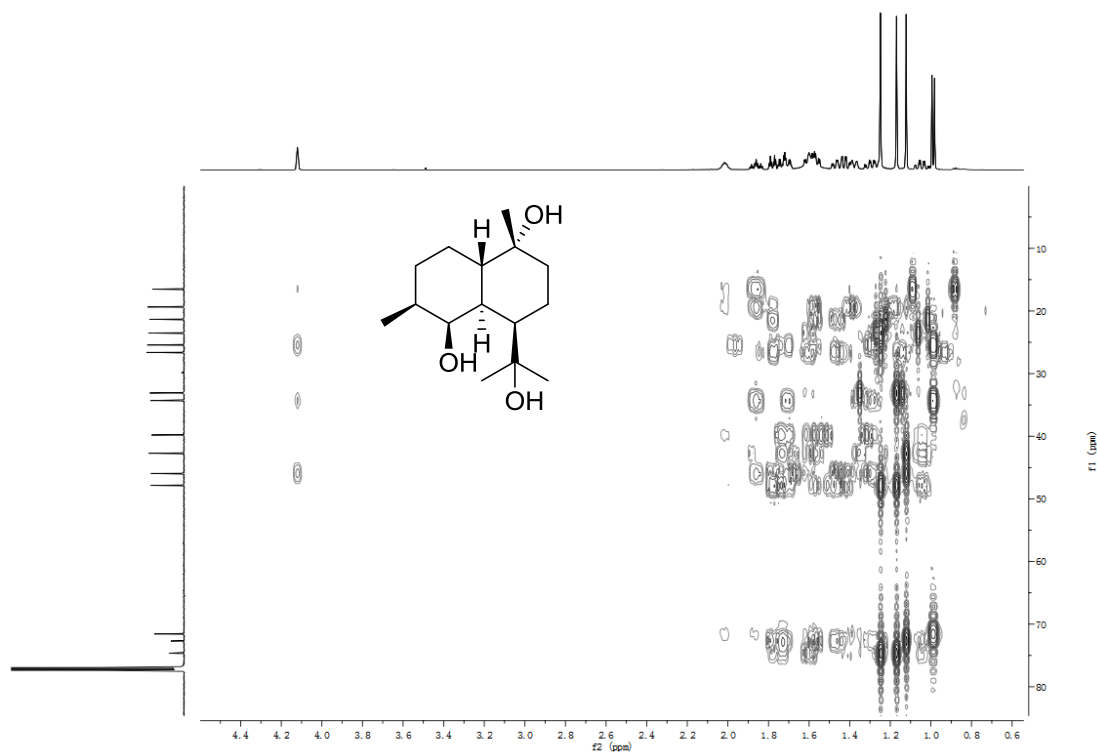

Figure S76. NOESY spectrum of compound **8** in CDCl<sub>3</sub>

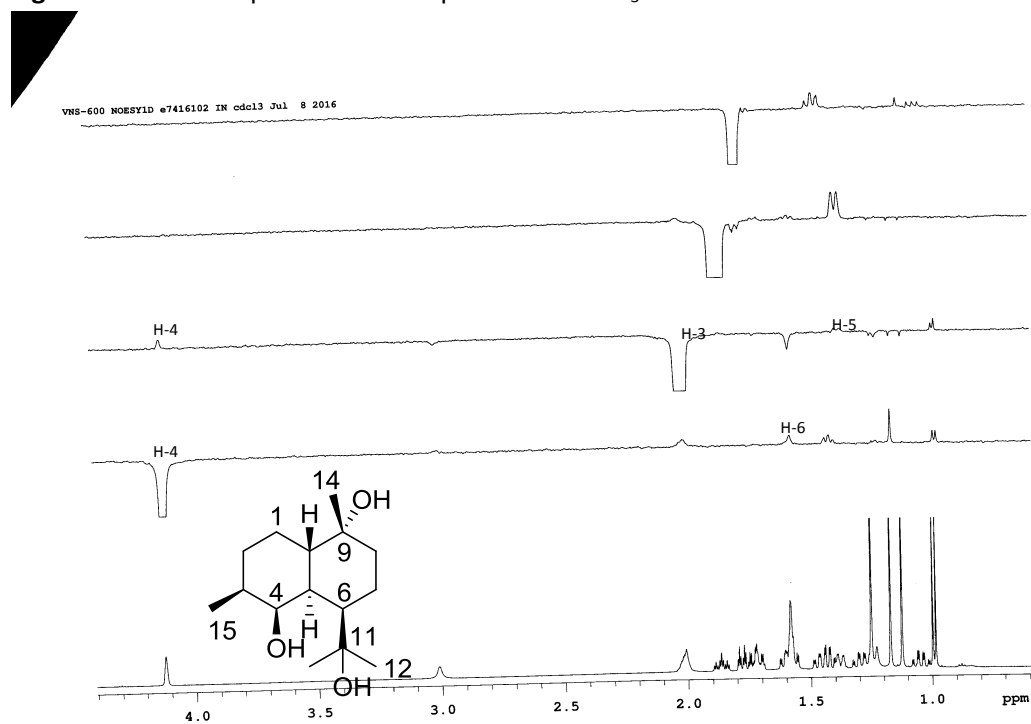

VNS-600 NOESYID e7416102 IN cdcl3 Jul 8 2016

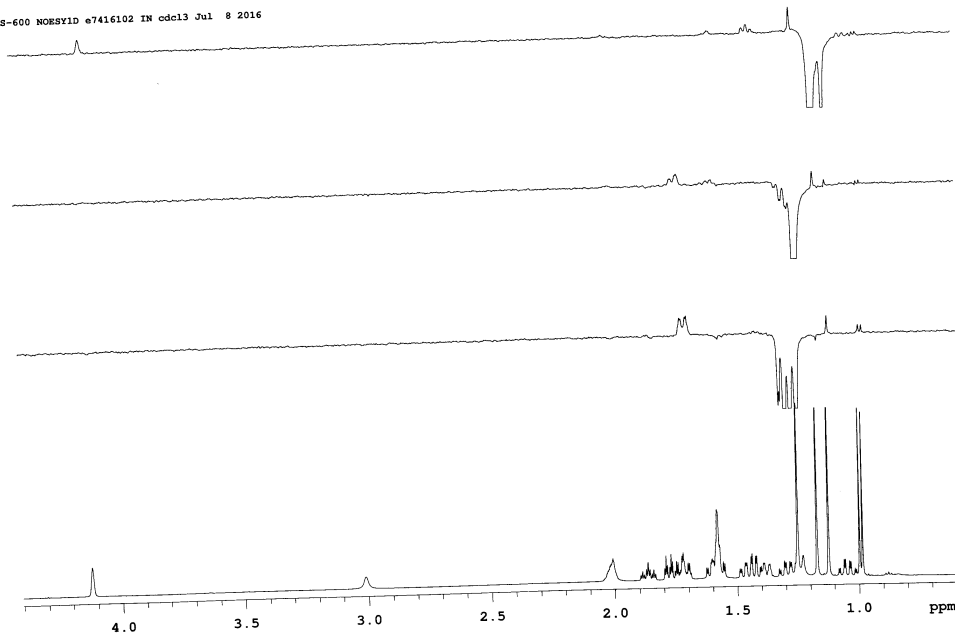

VNS-600 NOESYID e7416102 IN cdcl3 Jul 8 2016

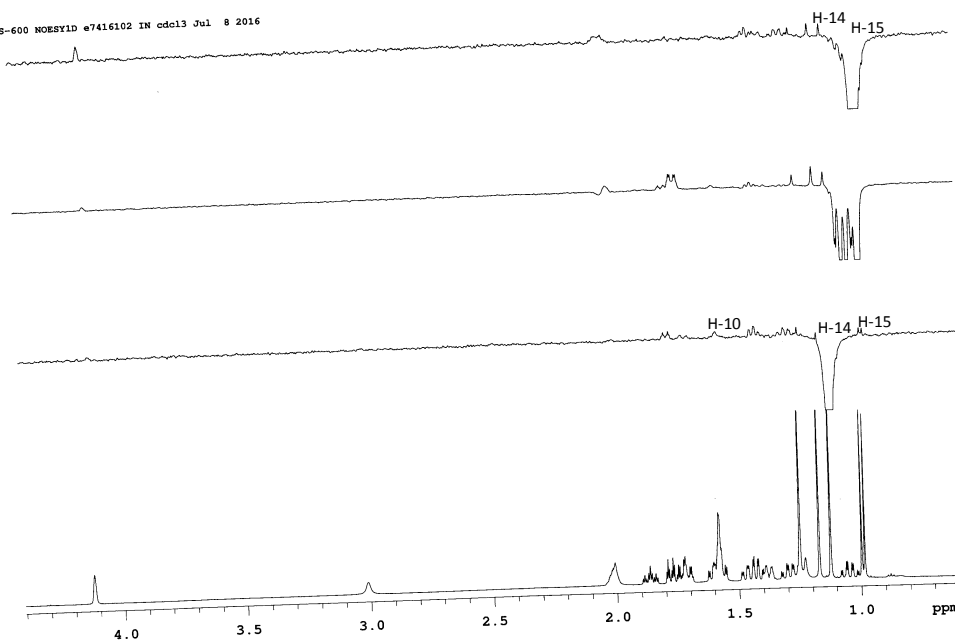

Figure S77. HRESIMS spectrum of compound 8

E7416102 #999 RT: 3.43 AV: 1 NL: 2.60E8  
T: FTMS + c ESI Full ms [100.00-1000.00]

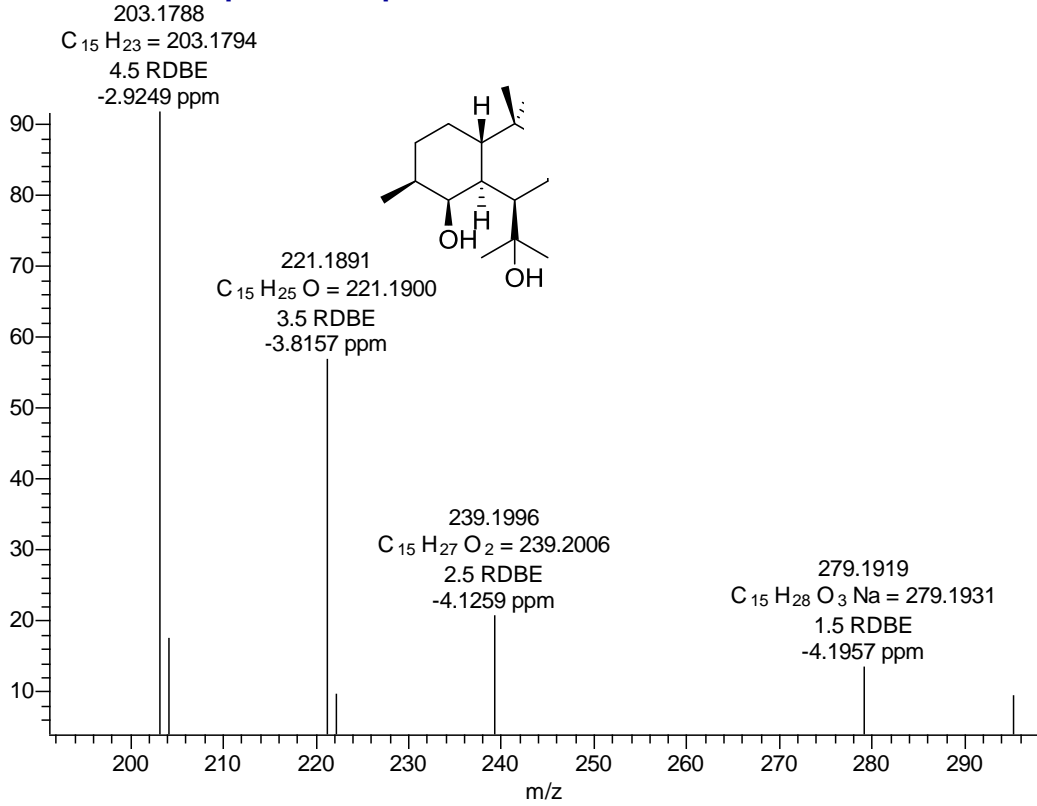

Figure S78. IR spectrum of compound 8

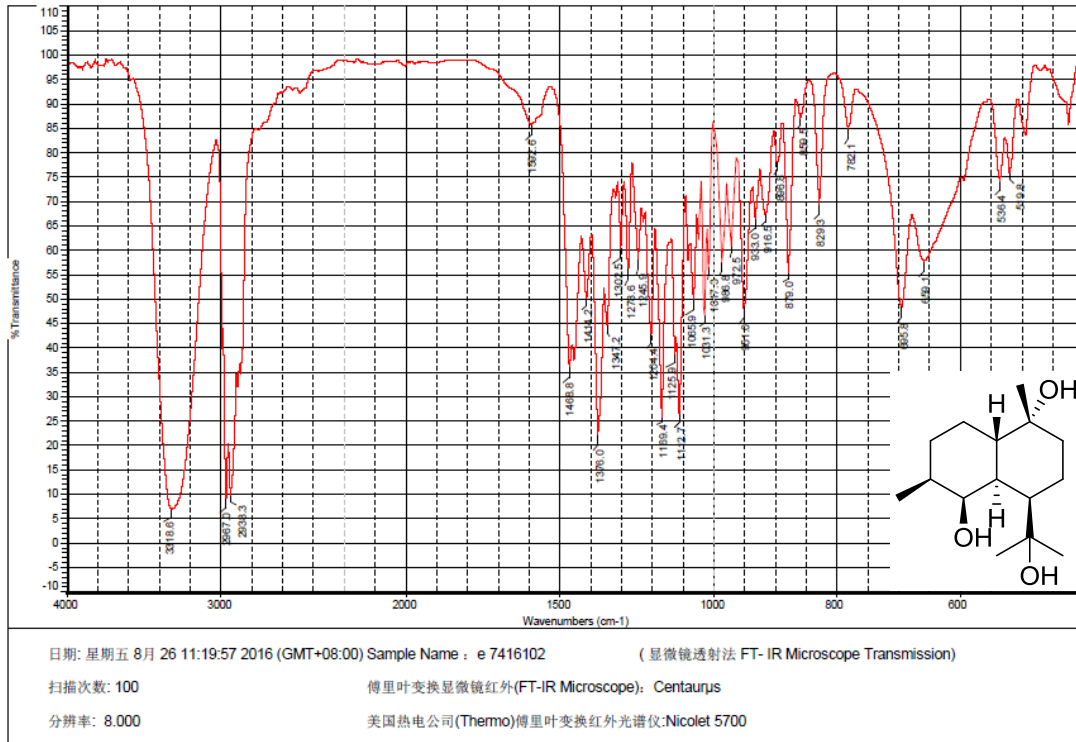

Figure S79.  $^1\text{H}$  NMR spectrum of compound **9** in  $\text{CDCl}_3$

$^1\text{H}$ NMR in  $\text{CDCl}_3$  at 400MHz Bruker AVANCEIII 400

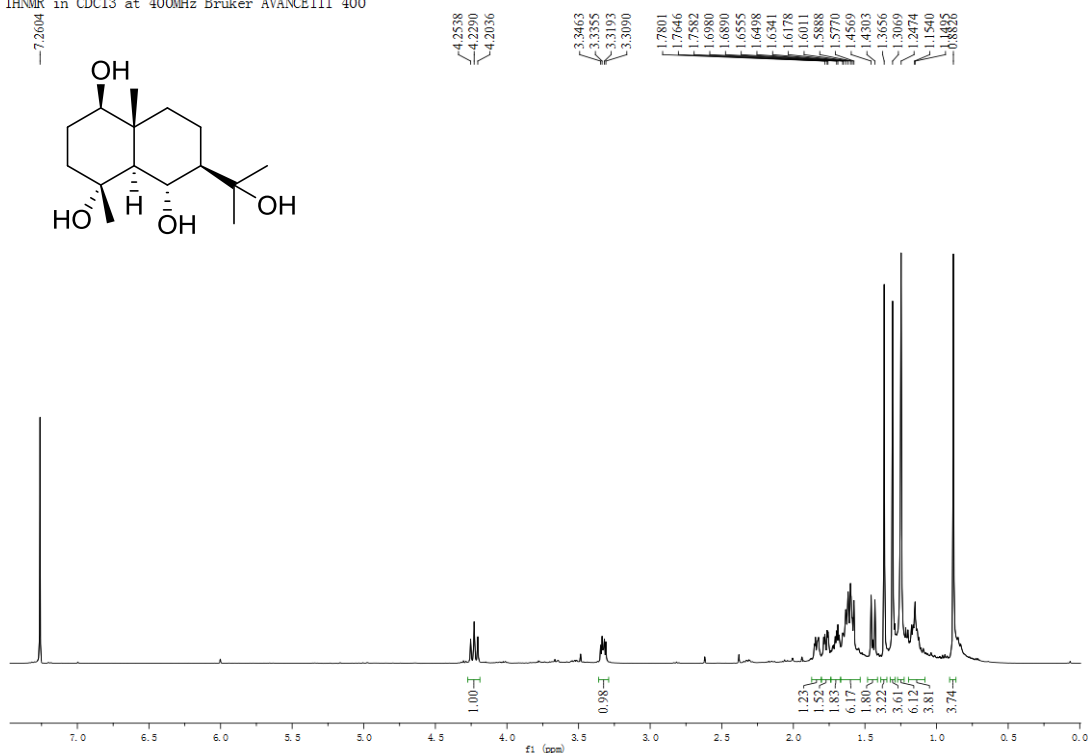

Figure S80.  $^{13}\text{C}$  NMR spectrum of compound **9** in  $\text{CDCl}_3$

$^{13}\text{C}$ NMR in  $\text{CDCl}_3$  at 400MHz Bruker AVANCEIII 400

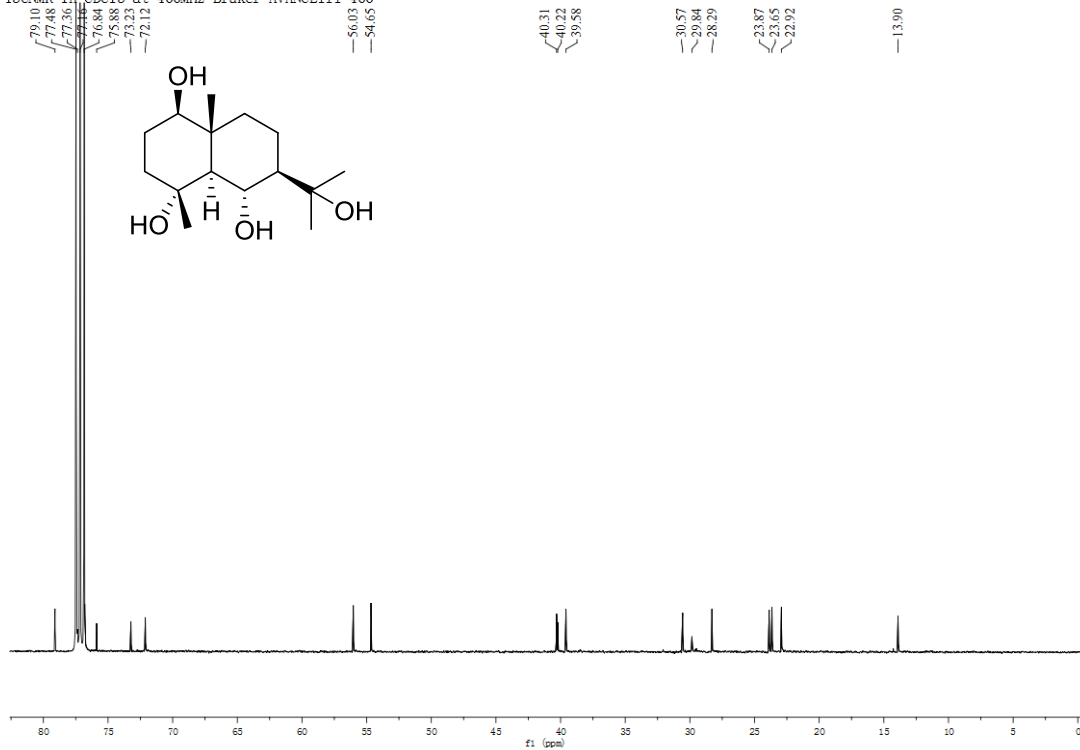

Figure S81. DEPT spectrum of compound **9** in CDCl<sub>3</sub>

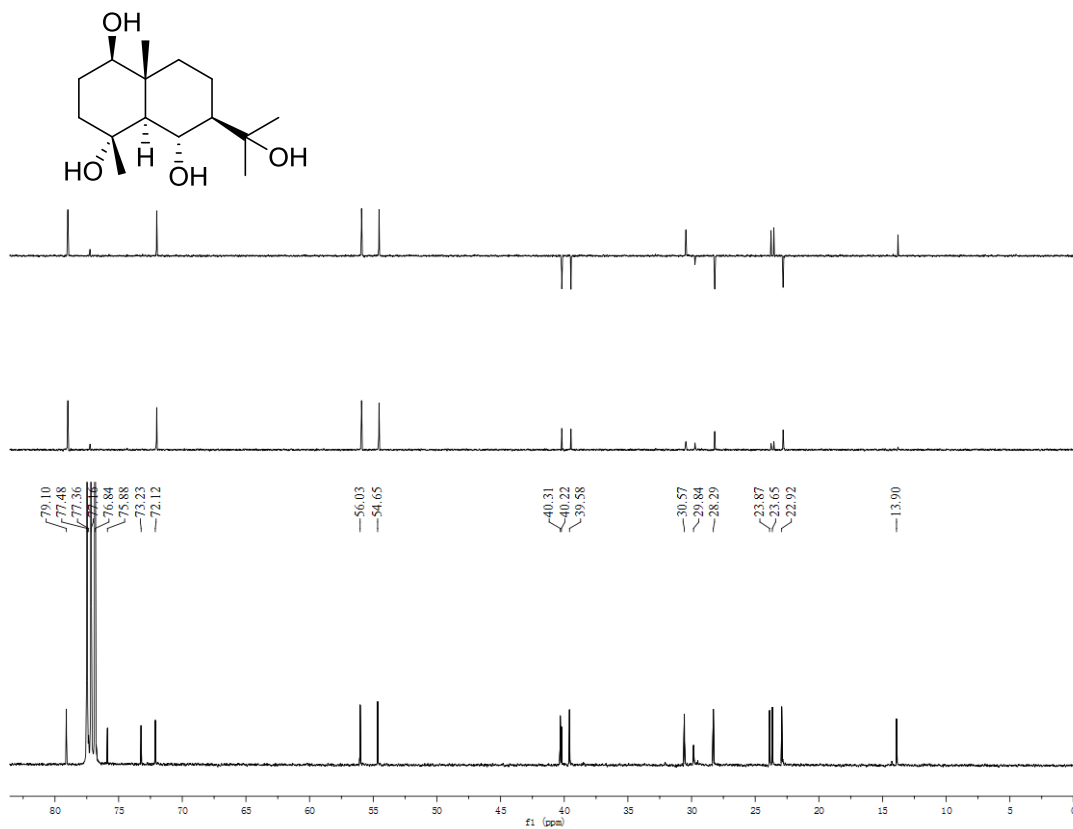

Figure S82. HSQC spectrum of compound **9** in CDCl<sub>3</sub>

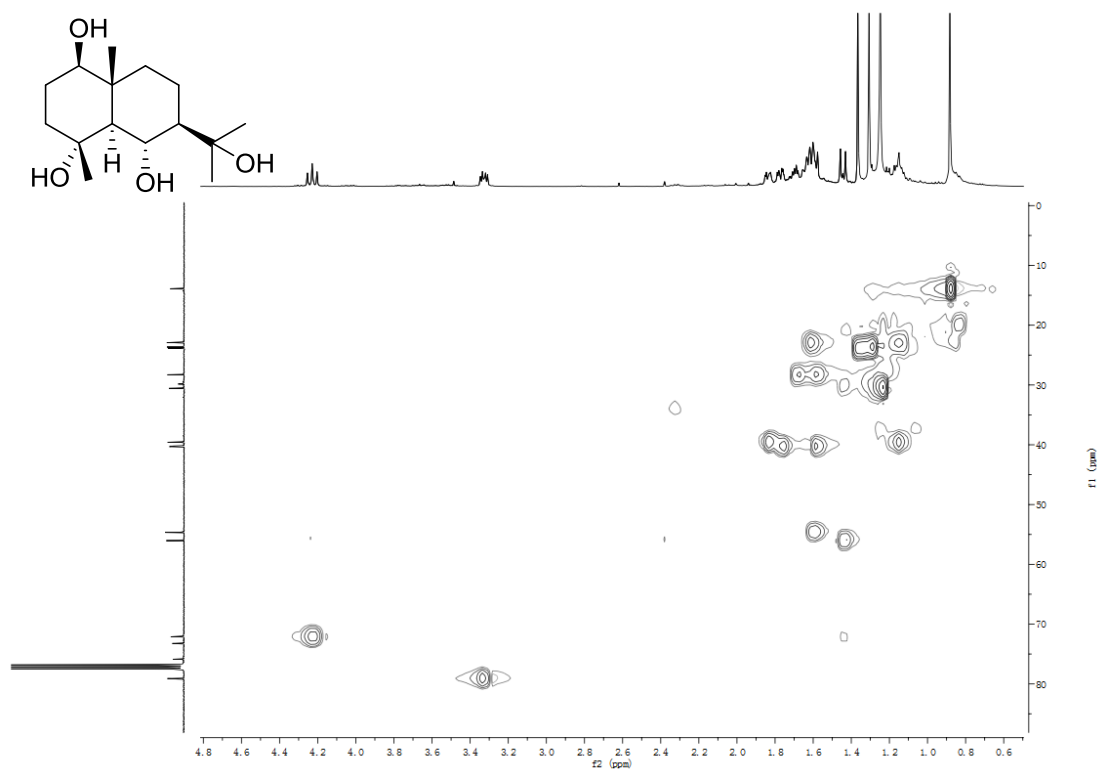



Figure S83.  $^1\text{H}$ - $^1\text{H}$  COSY spectrum of compound **9** in  $\text{CDCl}_3$

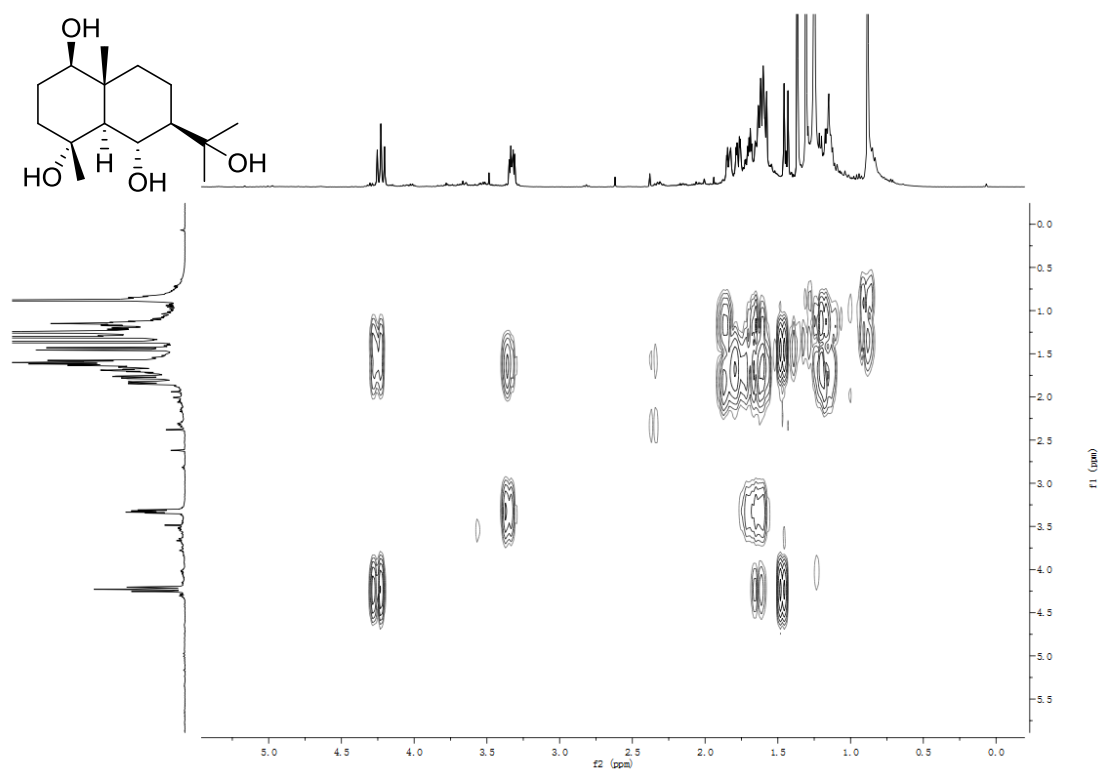

Figure S84. HMBC spectrum of compound **9** in  $\text{CDCl}_3$

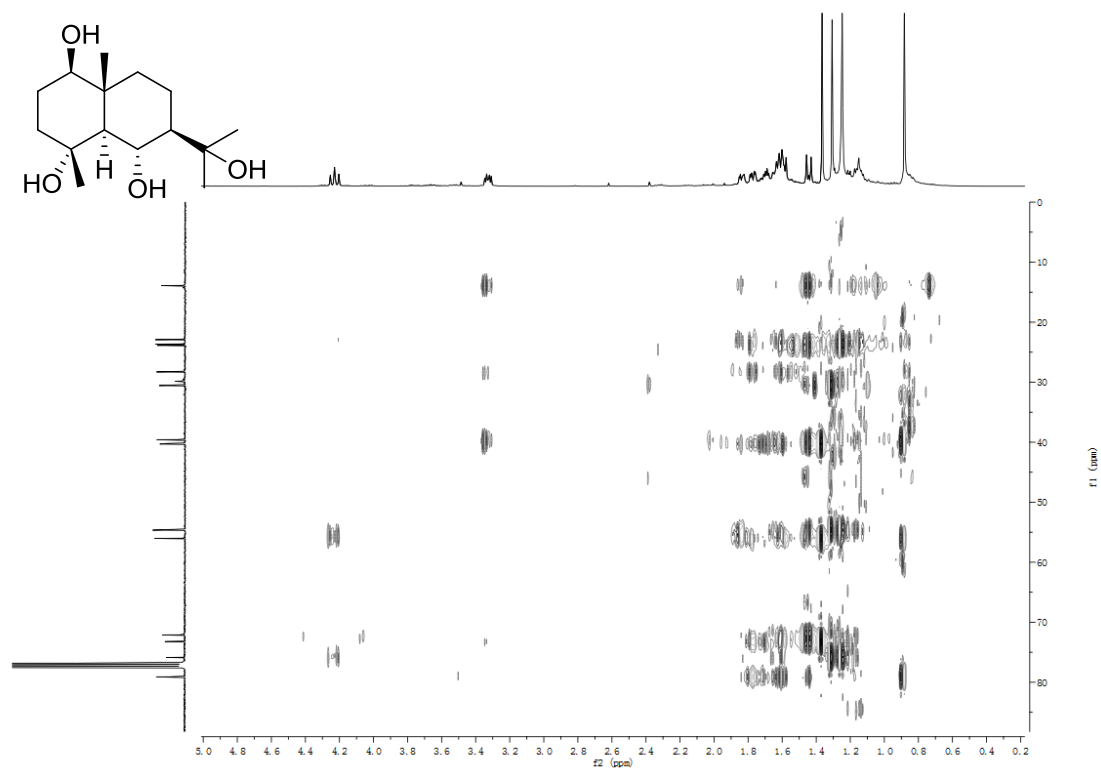

Figure S85. NOESY spectrum of compound **9** in CDCl<sub>3</sub>

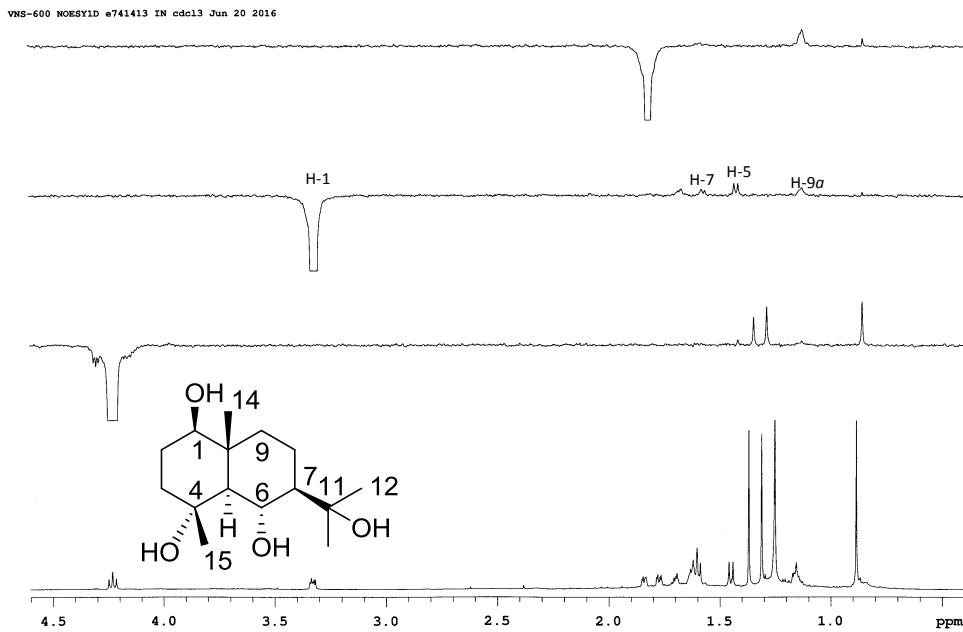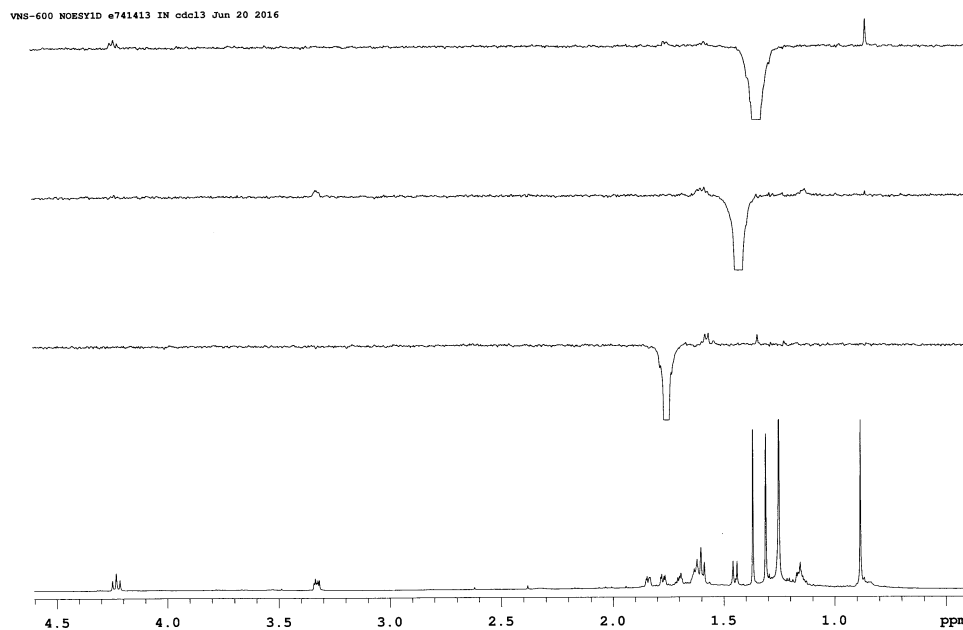

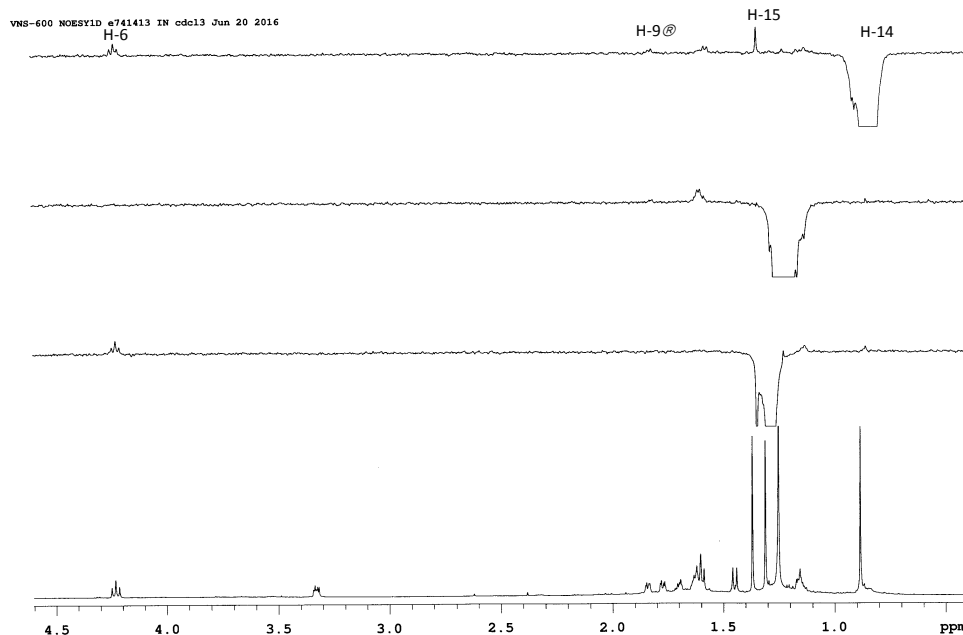

**Figure S86.** HRESIMS spectrum of compound **9**

E741413 #1474 RT: 3.01 AV: 1 NL: 2.98E8  
T: FTMS + c ESI Full ms [100.00-1000.00]

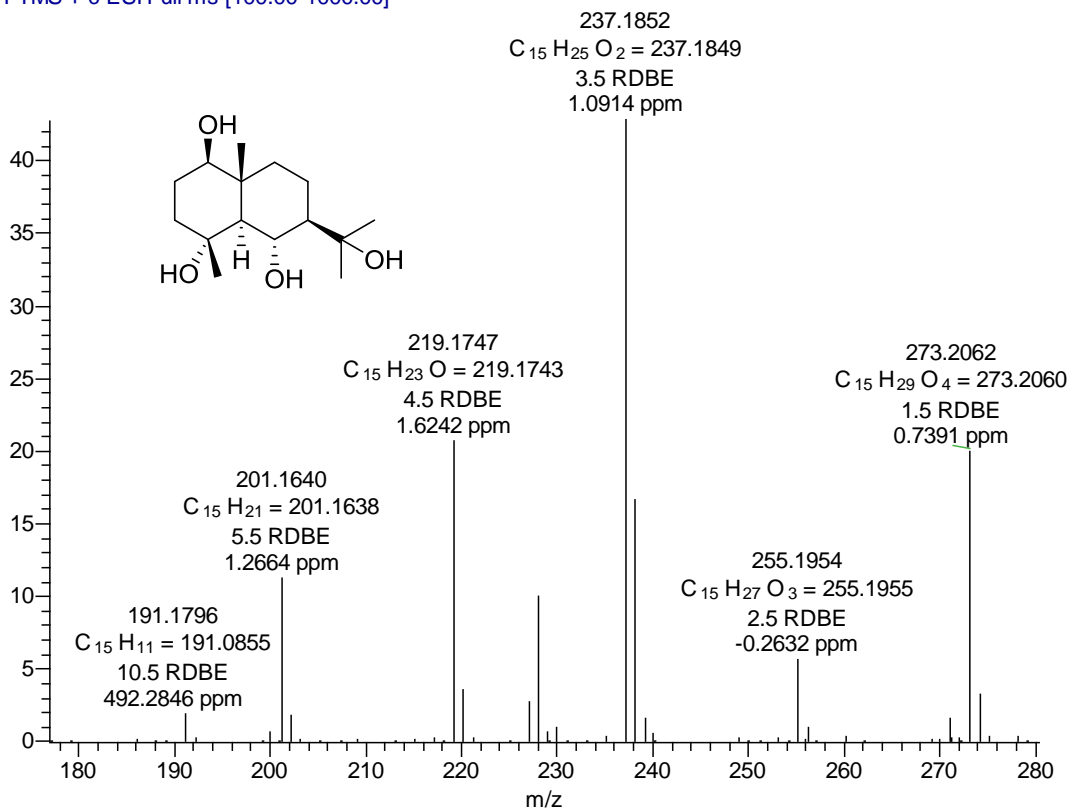

Figure S87. IR spectrum of compound 9

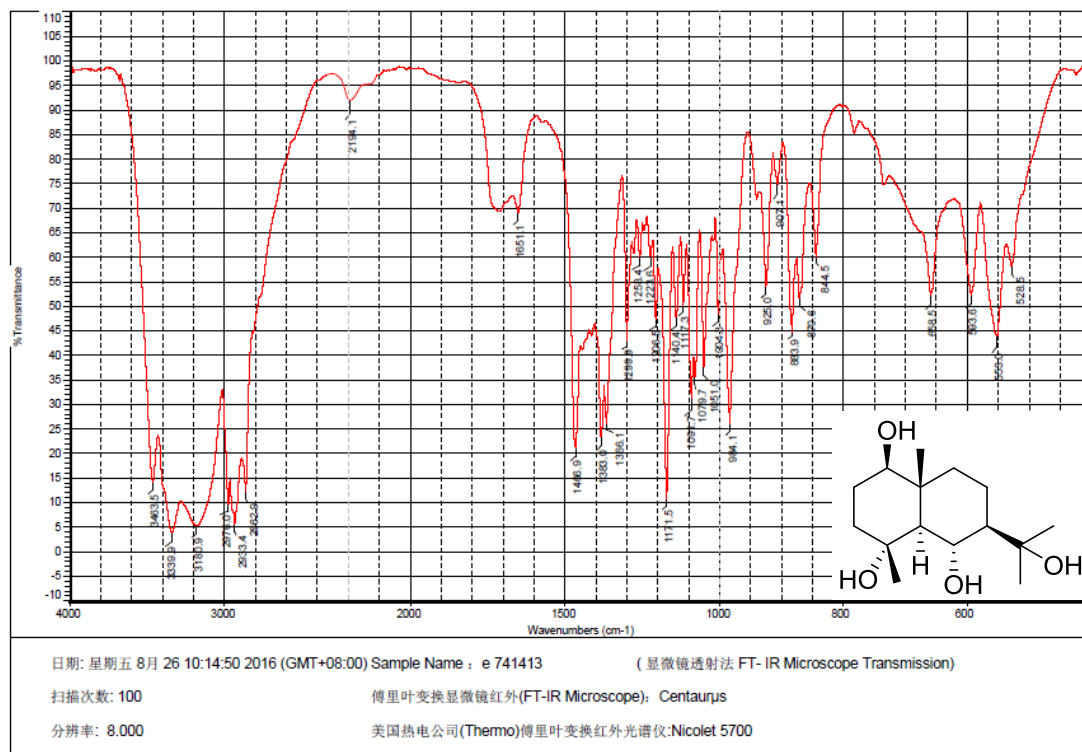

Figure S88. <sup>1</sup>H NMR spectrum of compound 10 in CDCl<sub>3</sub>

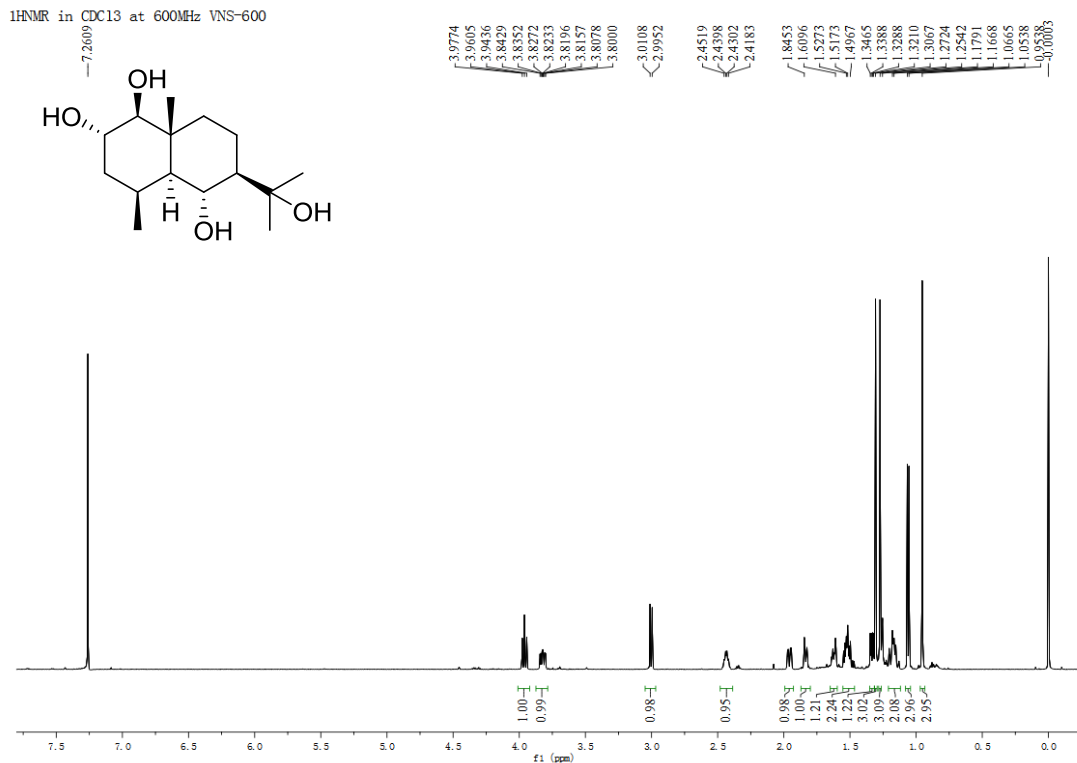

Figure S89.  $^{13}\text{C}$  NMR spectrum of compound **10** in  $\text{CDCl}_3$

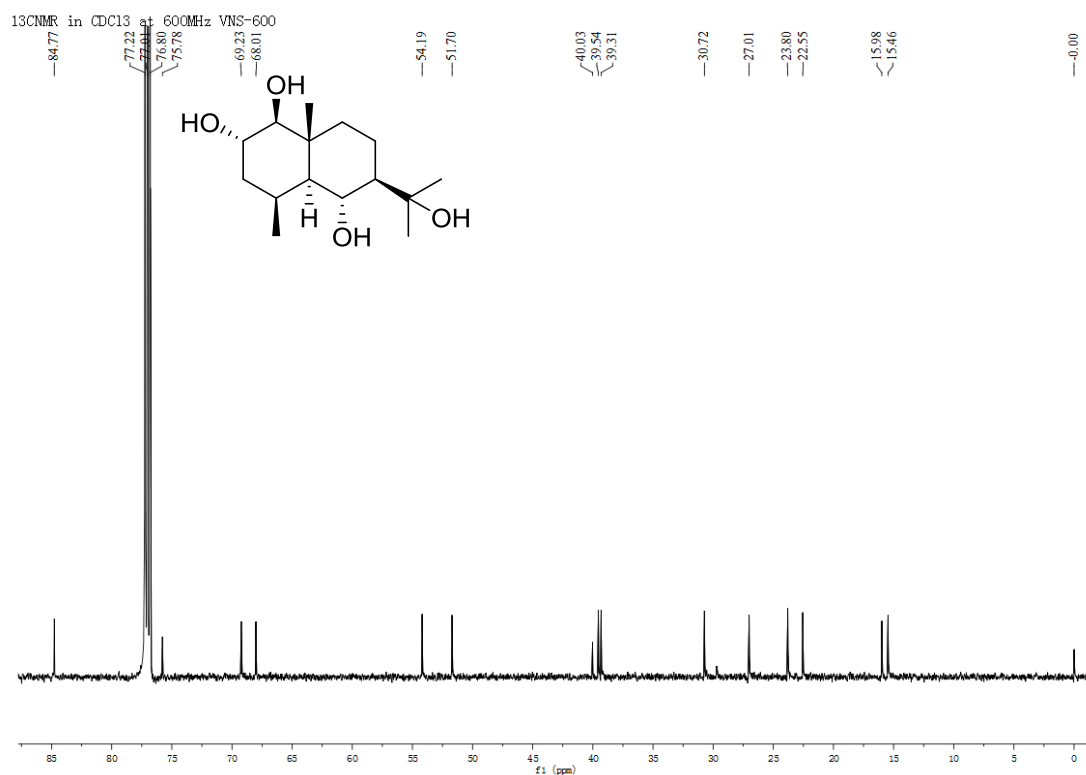

Figure S90. DEPT spectrum of compound **10** in  $\text{CDCl}_3$

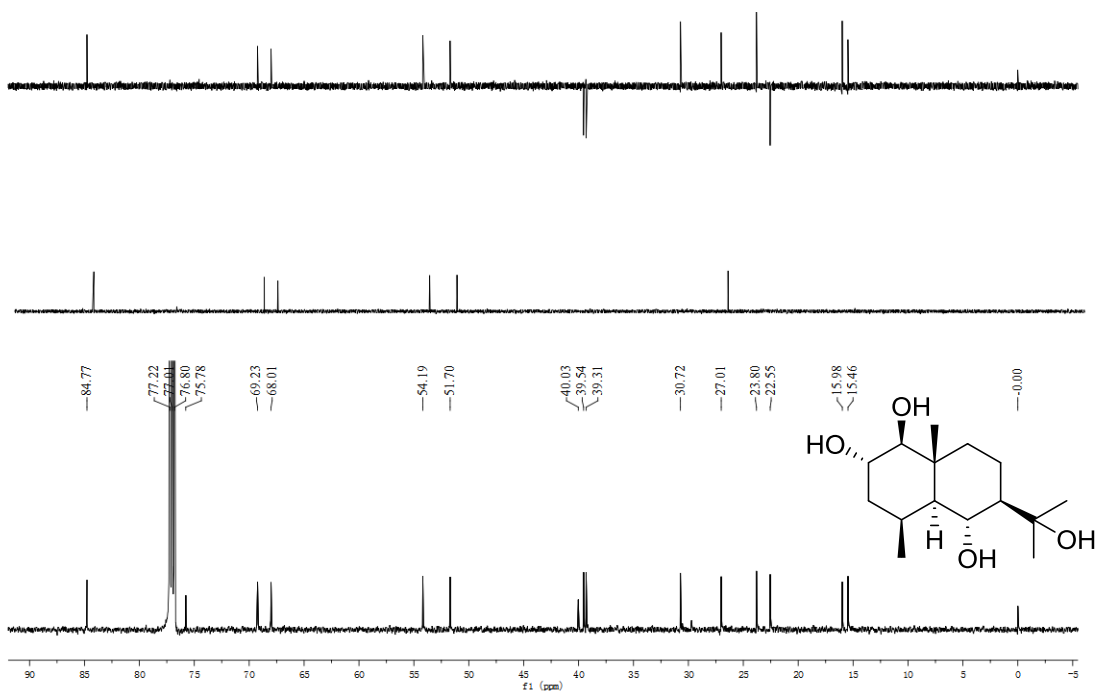

Figure S91. HSQC spectrum of compound **10** in CDCl<sub>3</sub>

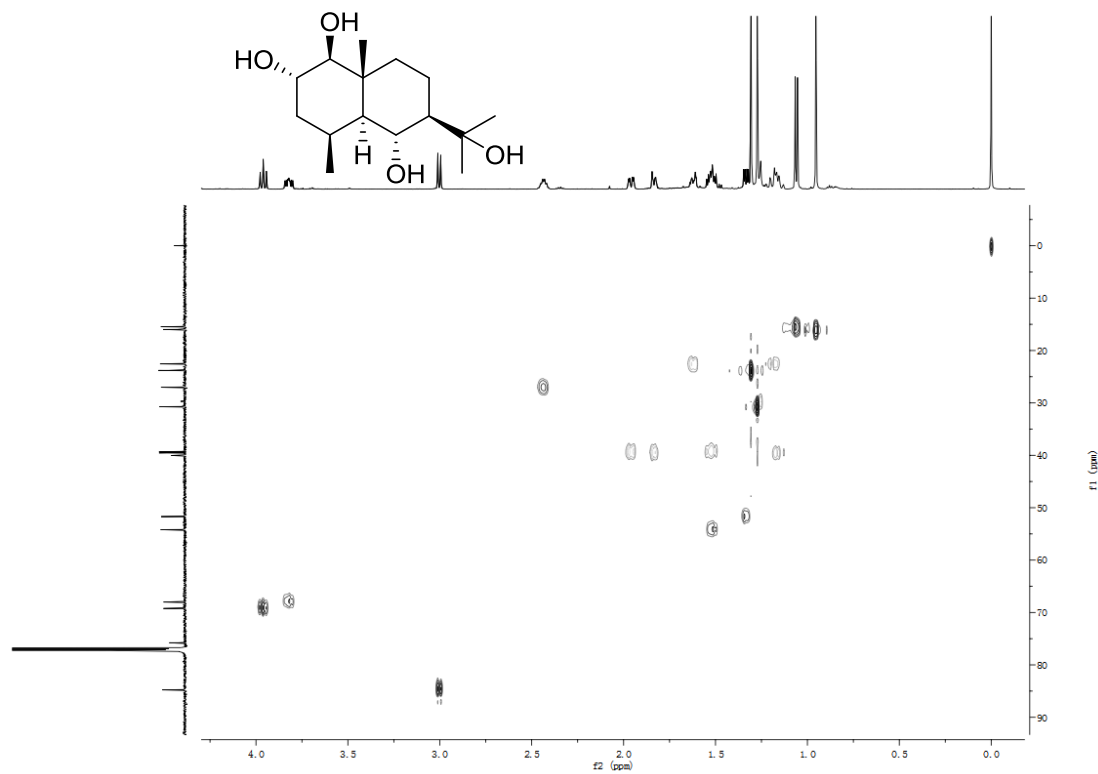

Figure S92. <sup>1</sup>H-<sup>1</sup>H COSY spectrum of compound **10** in CDCl<sub>3</sub>

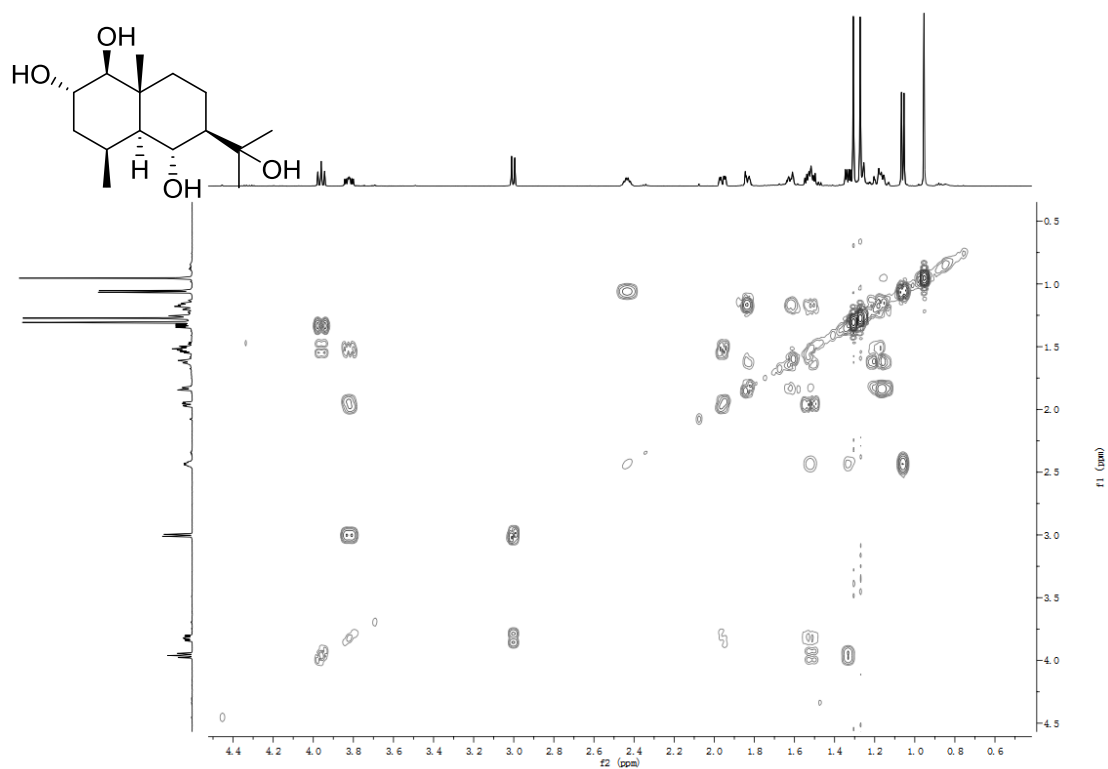

Figure S93. HMBC spectrum of compound **10** in CDCl<sub>3</sub>

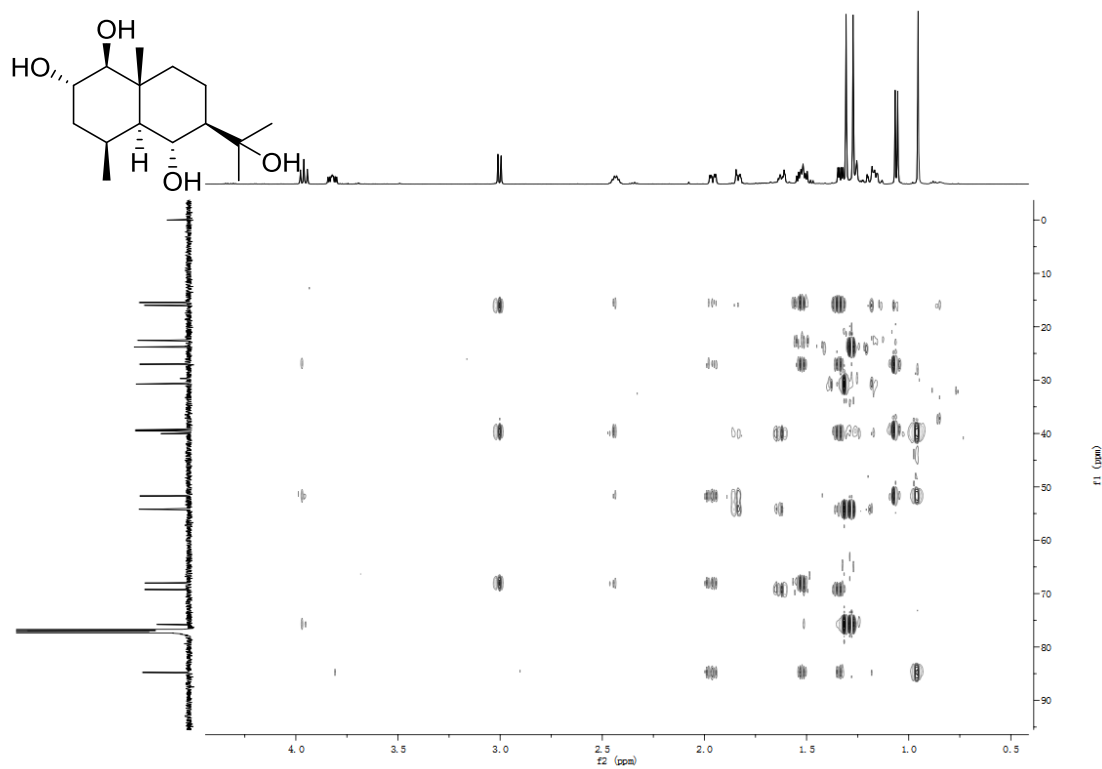

Figure S94. NOESY spectrum of compound **10** in CDCl<sub>3</sub>

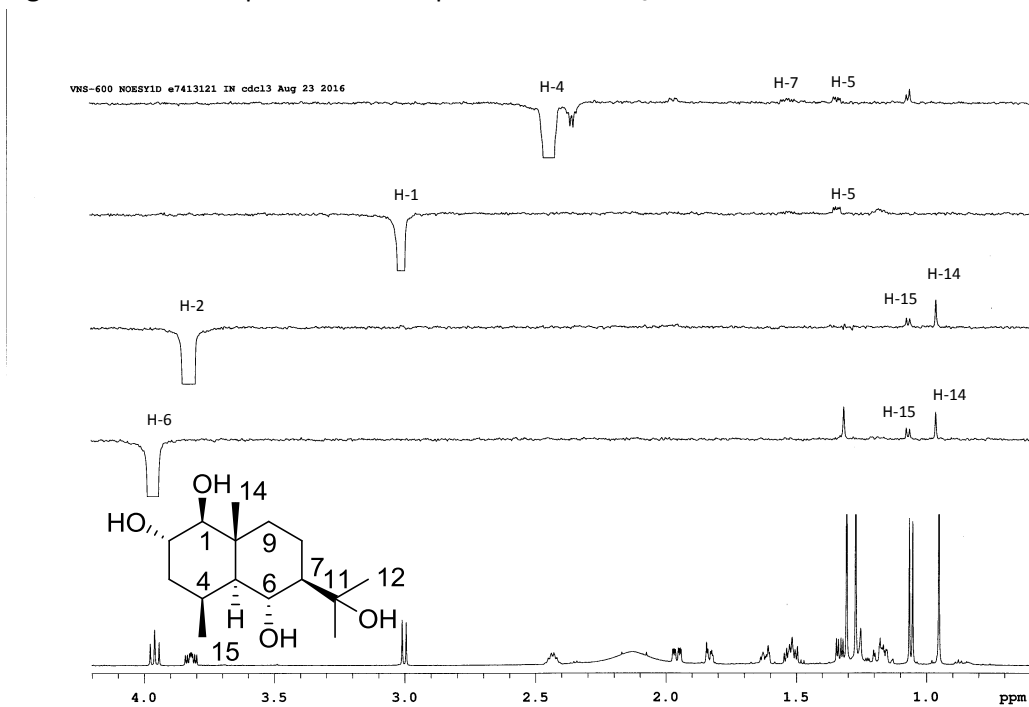

VNS-600 NOESY1D e7413121 IN cdcl3 Aug 23 2016

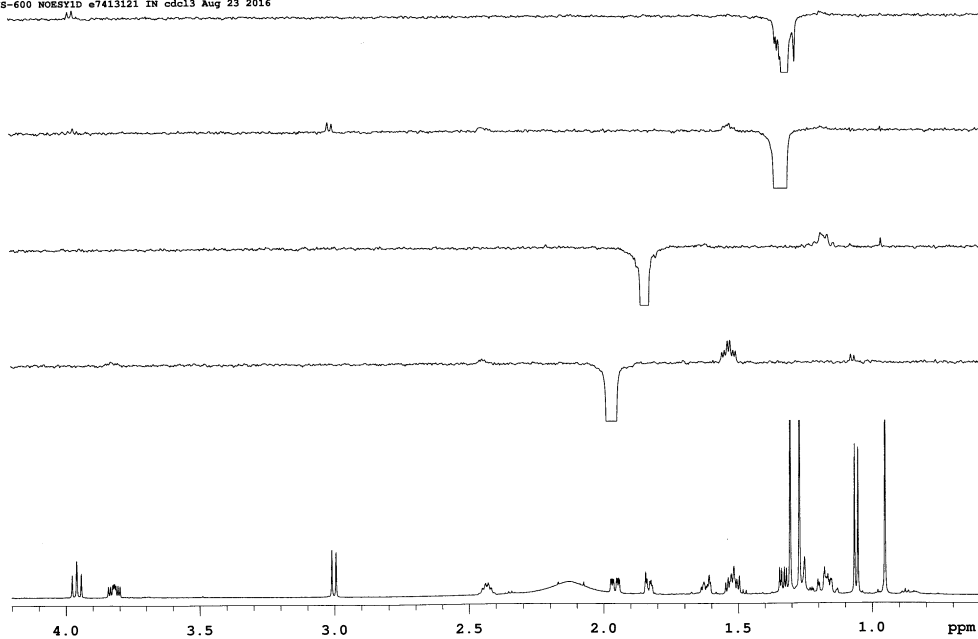

VNS-600 NOESY1D e7413121 IN cdcl3 Aug 23 2016

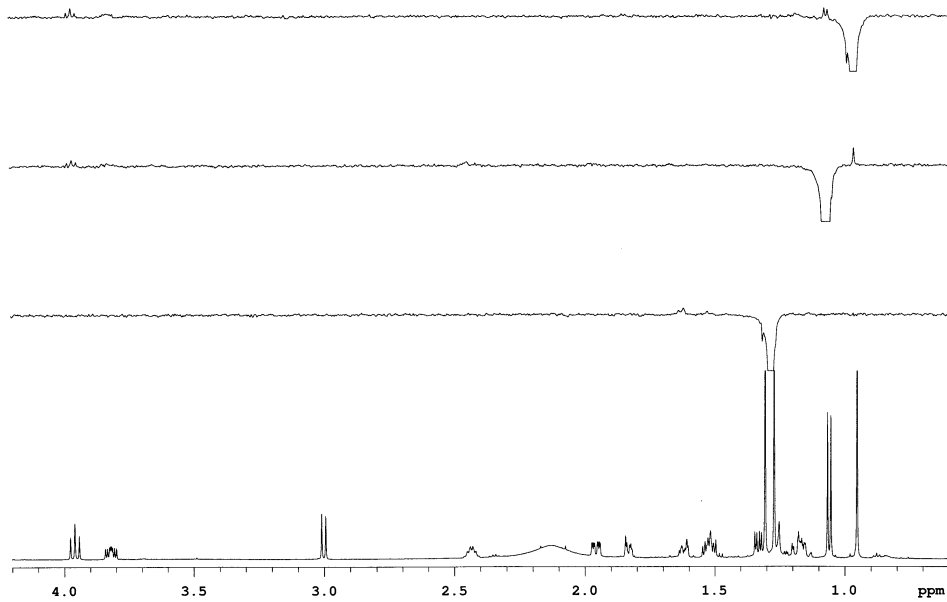



Figure S95. HRESIMS spectrum of compound 10

E7413121 #788 RT: 2.71 AV: 1 NL: 5.16E7

T: FTMS + c ESI Full ms [100.00-1000.00]

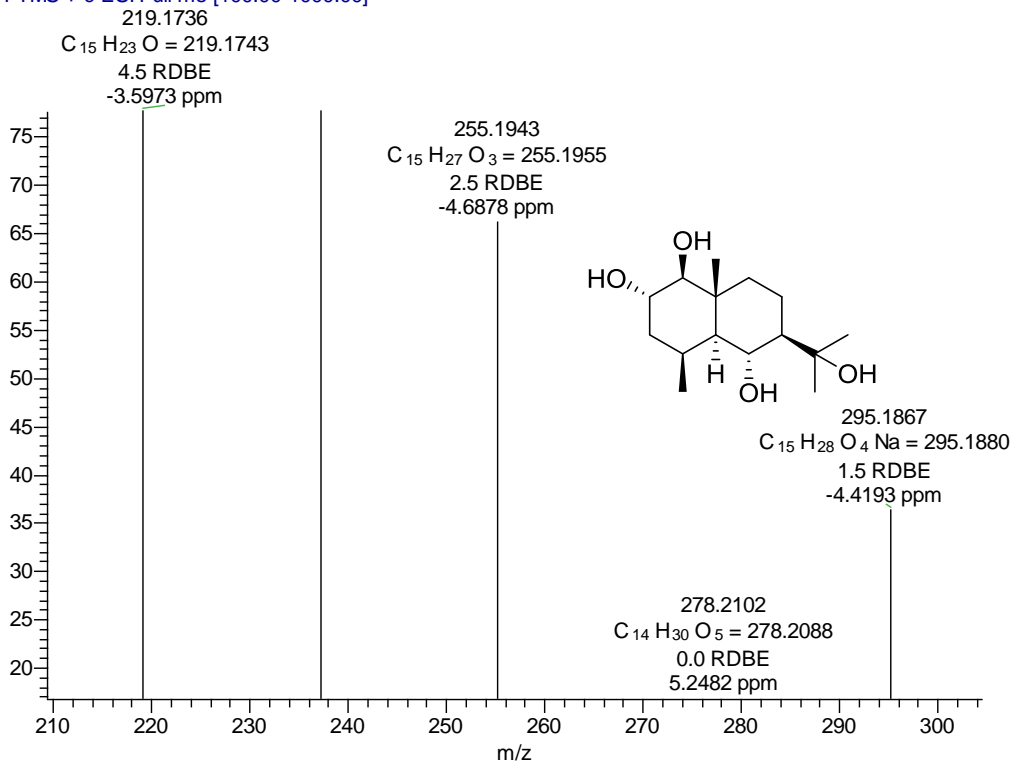

Figure S96. IR spectrum of compound 10

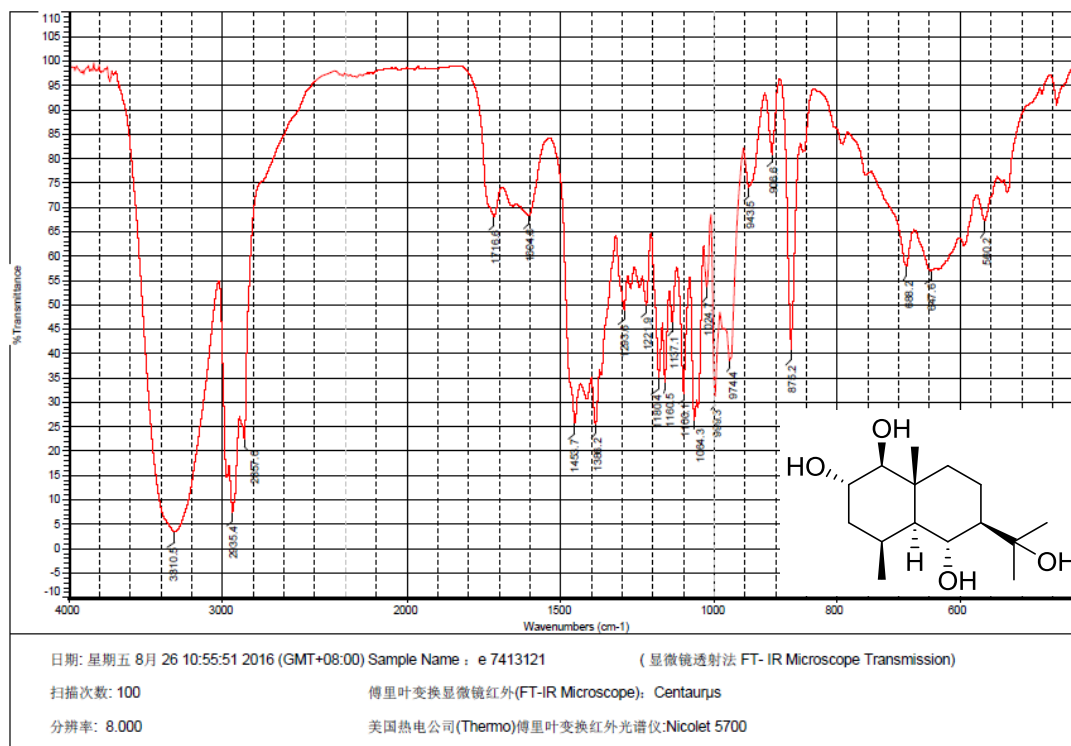

Figure S97.  $^1\text{H}$  NMR spectrum of compound **11** in  $\text{CDCl}_3$

$^1\text{H}$ NMR in  $\text{CDCl}_3$  at 400MHz

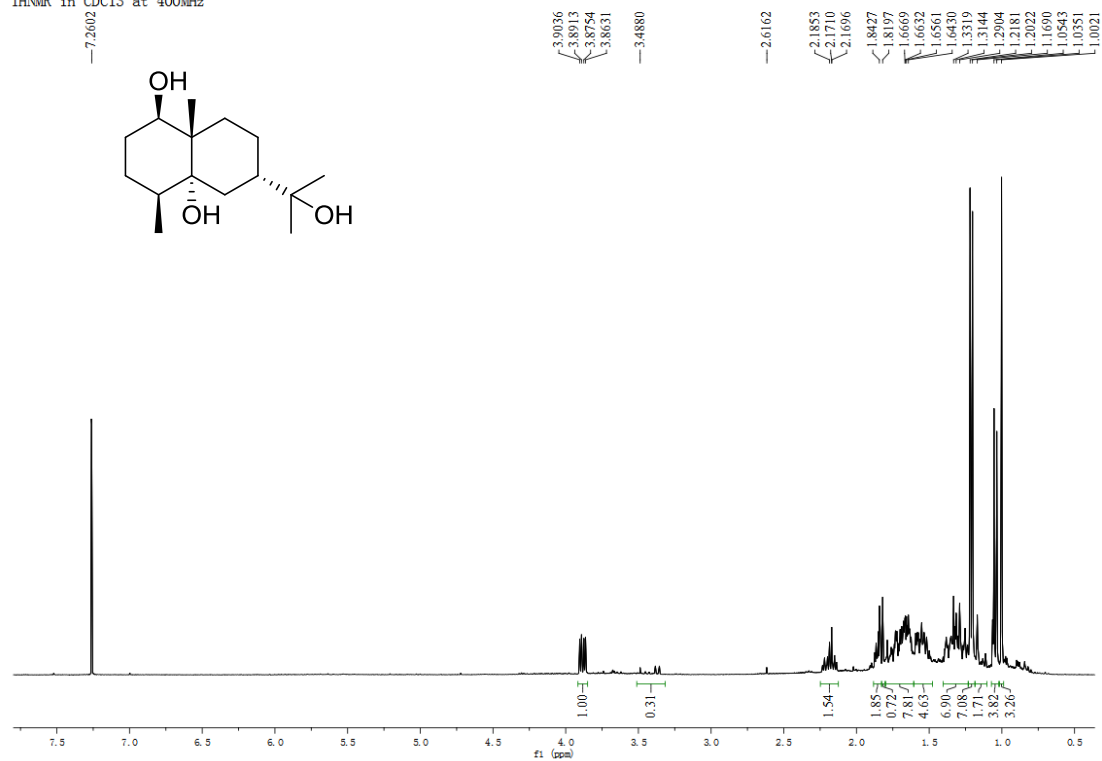

Figure S98.  $^{13}\text{C}$  NMR spectrum of compound **11** in  $\text{CDCl}_3$

$^{13}\text{C}$ NMR in  $\text{CDCl}_3$  at 400MHz Bruker AVANCEIII 400

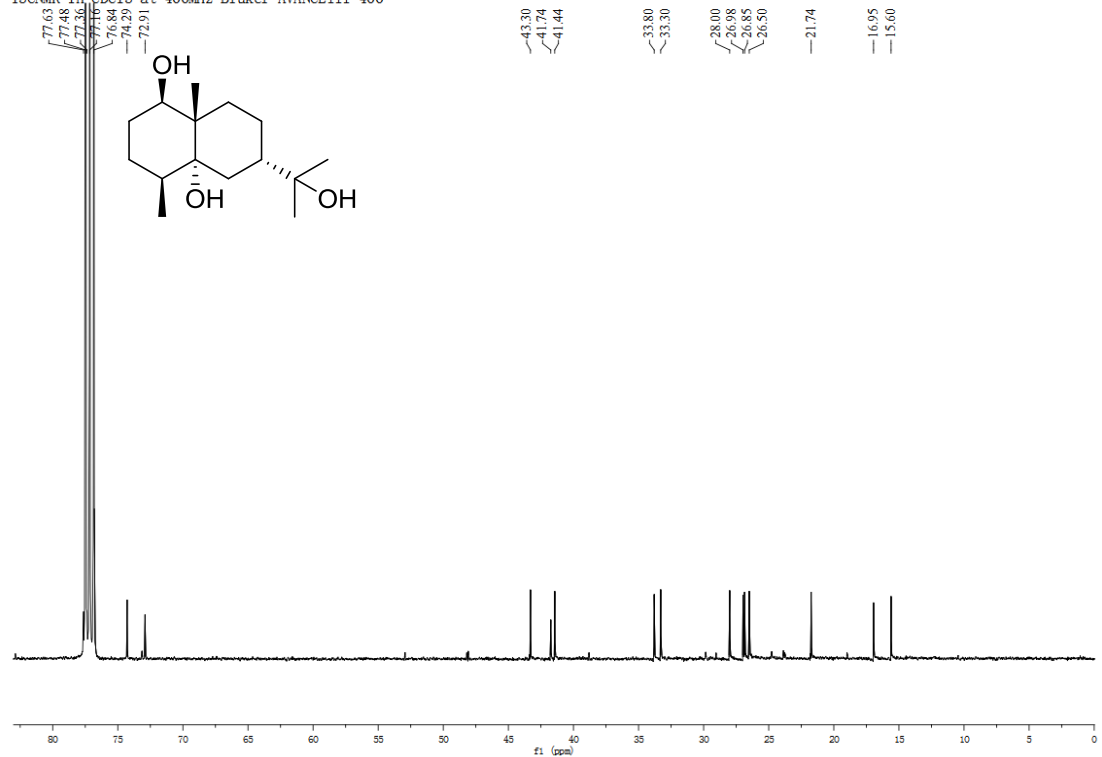

Figure S98-2. Enlarge  $^{13}\text{C}$  NMR spectrum of compound **11** in  $\text{CDCl}_3$

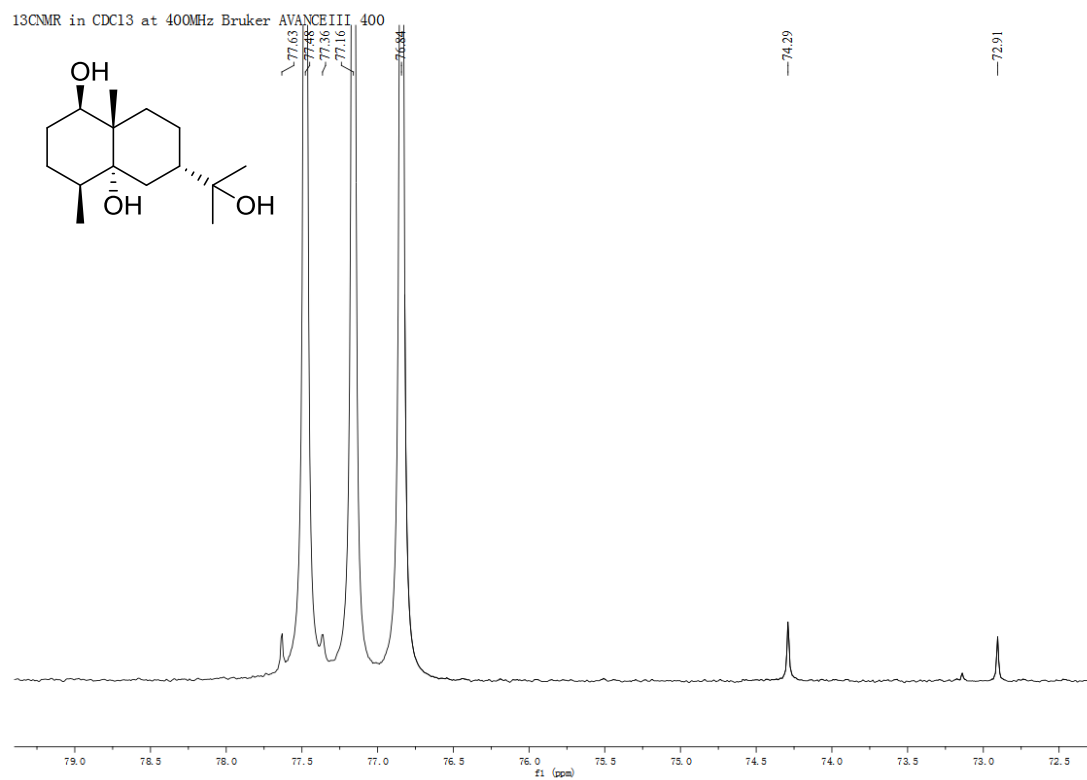

Figure S99. DEPT spectrum of compound **11** in  $\text{CDCl}_3$

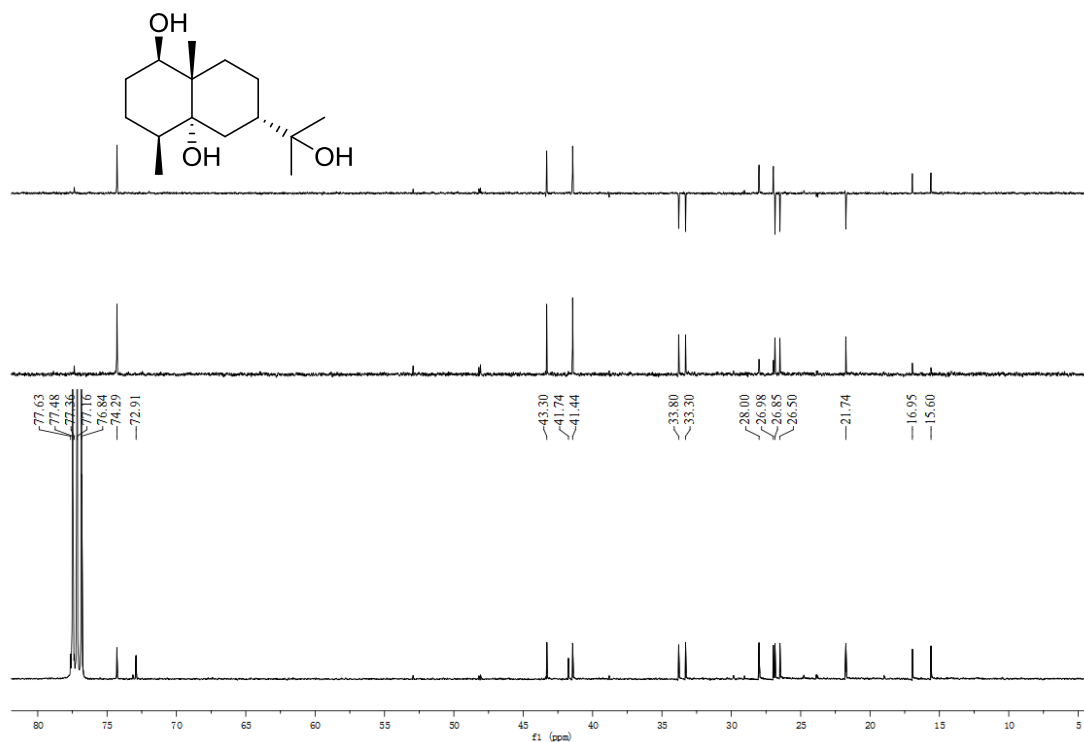

Figure S100. HSQC spectrum of compound **11** in CDCl<sub>3</sub>

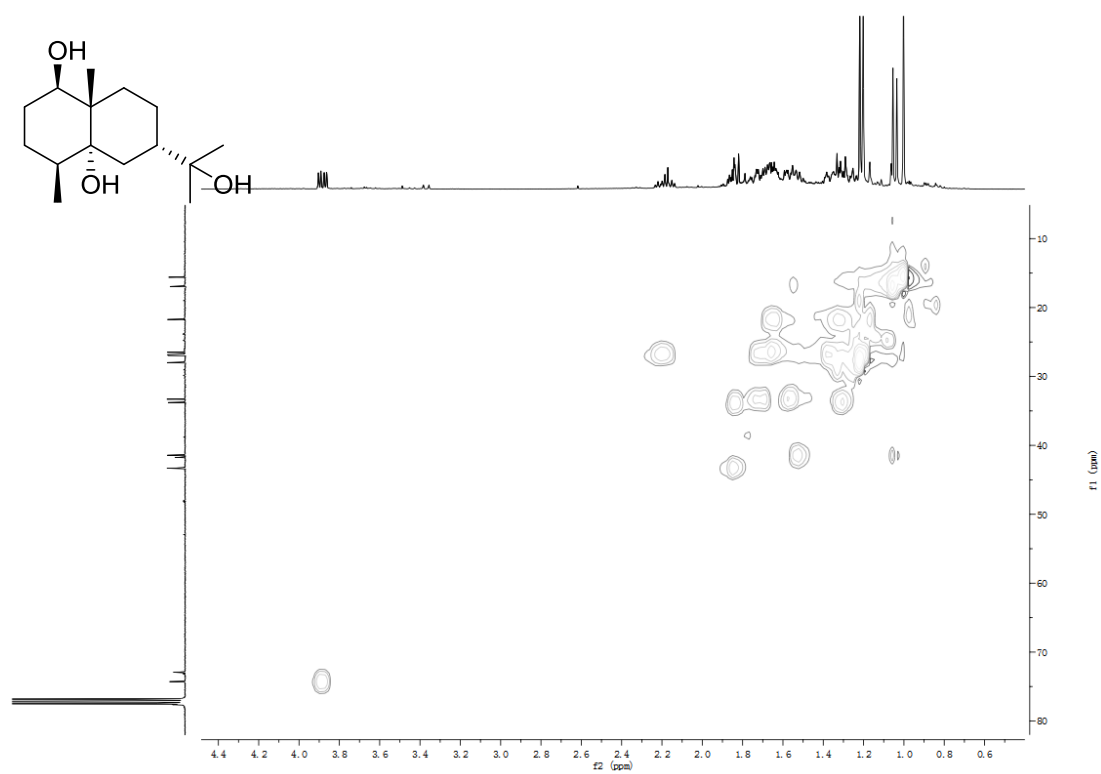

Figure S101. <sup>1</sup>H-<sup>1</sup>H COSY spectrum of compound **11** in CDCl<sub>3</sub>

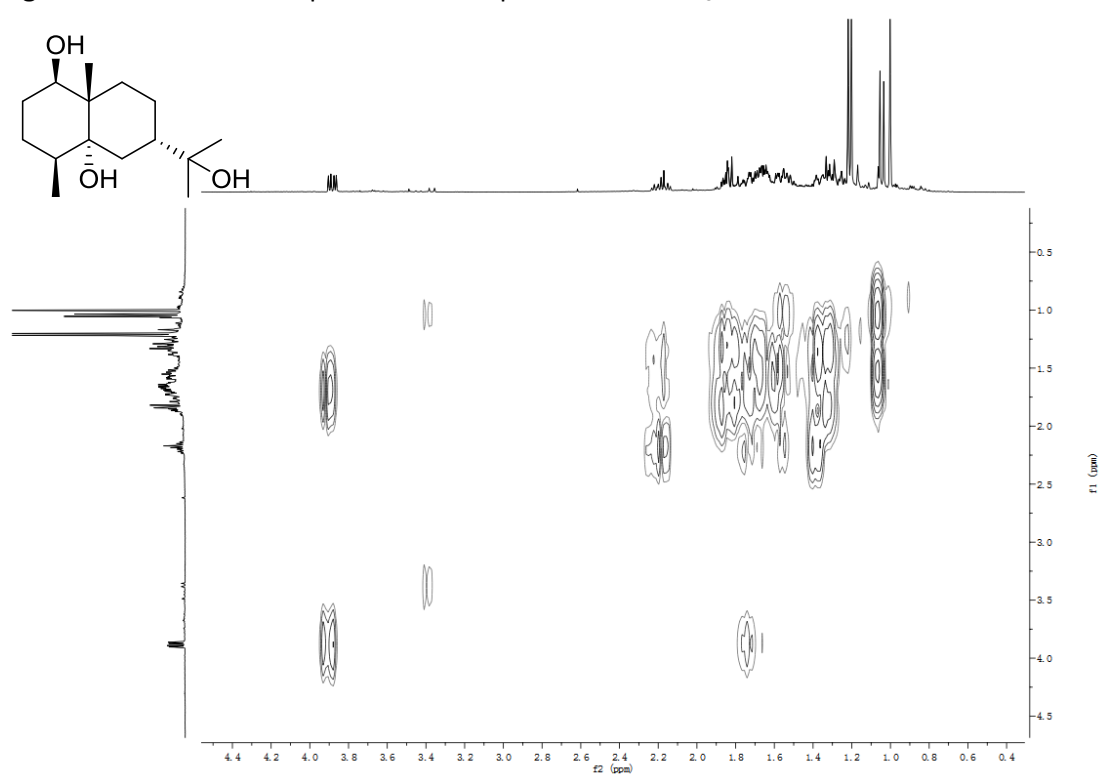

Figure S102. HMBC spectrum of compound **11** in CDCl<sub>3</sub>

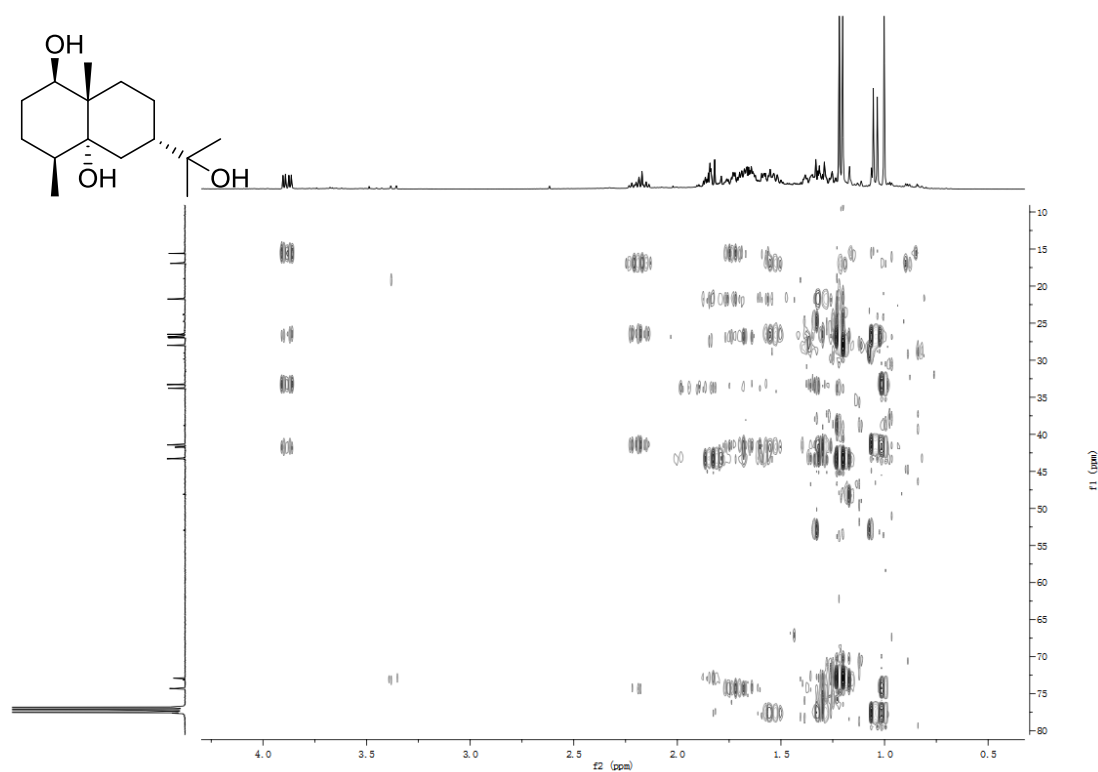

Figure S103. NOESY spectrum of compound **11** in CDCl<sub>3</sub>

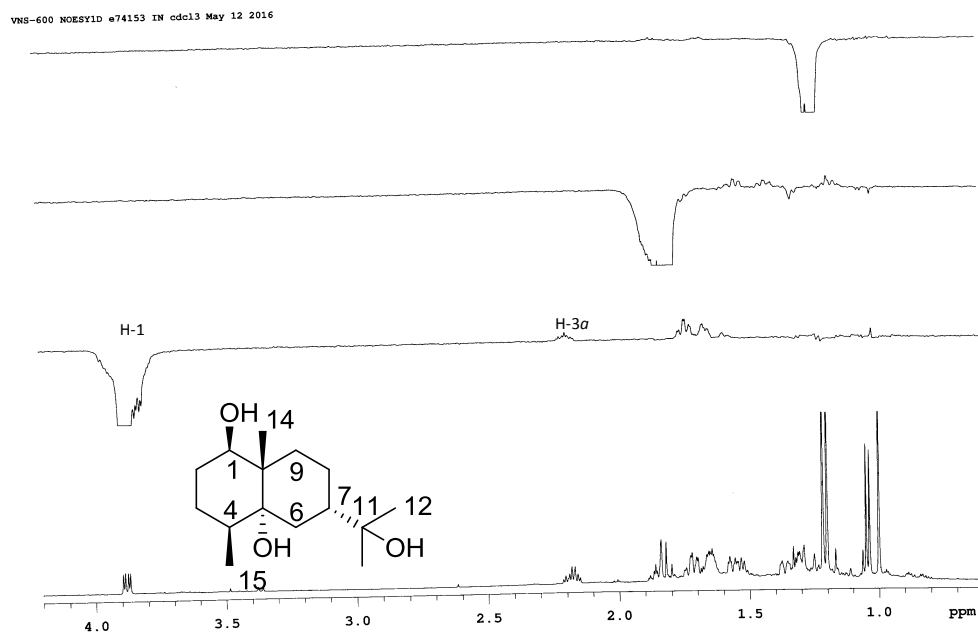

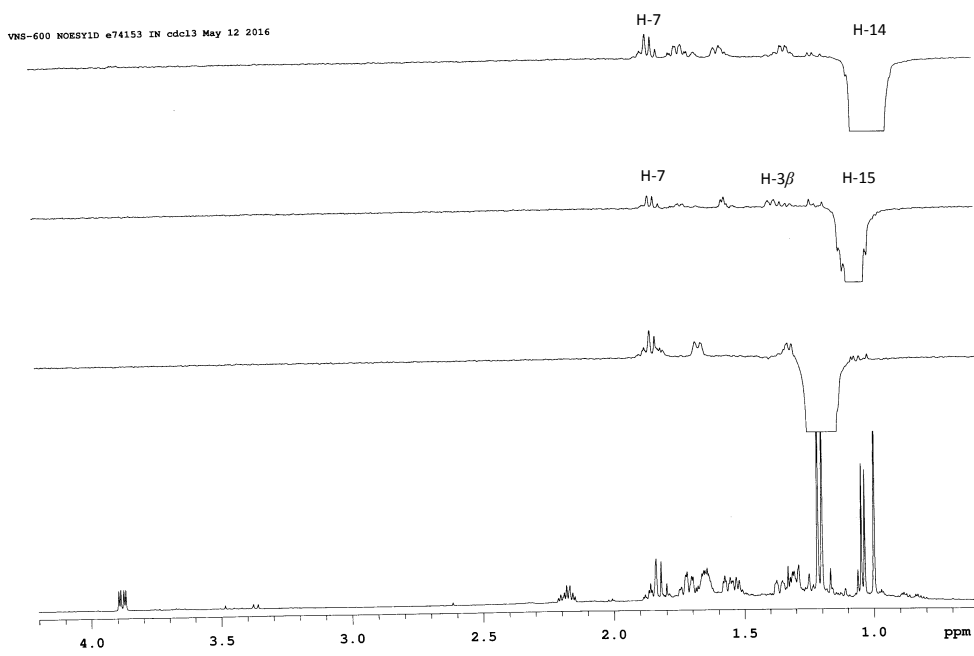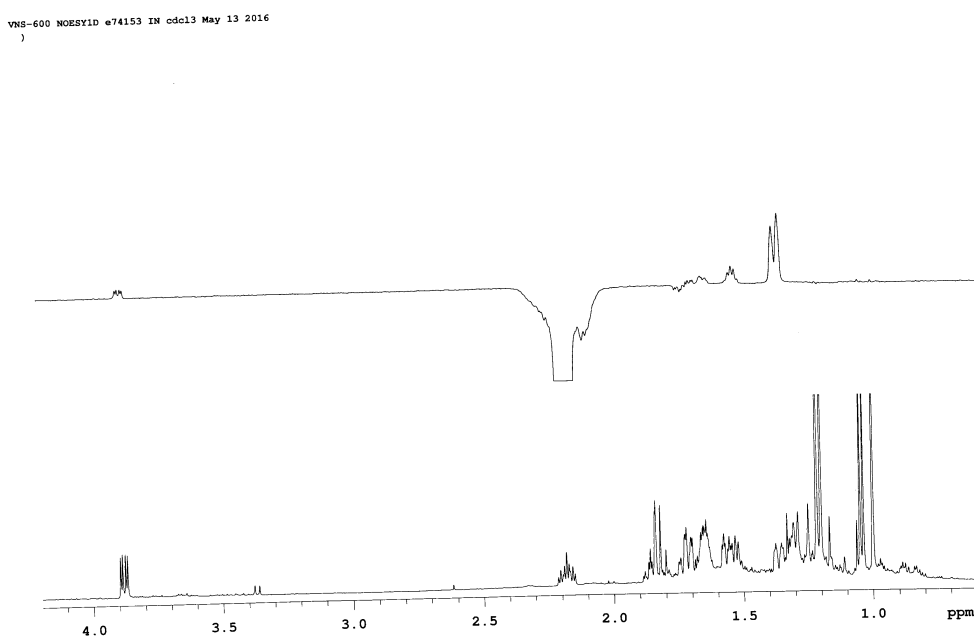

Figure S104. HRESIMS spectrum of compound 11

e74153 #1004 RT: 3.07 AV: 1 NL: 7.54E7  
T: FTMS + c ESI Full ms [100.00-1000.00]

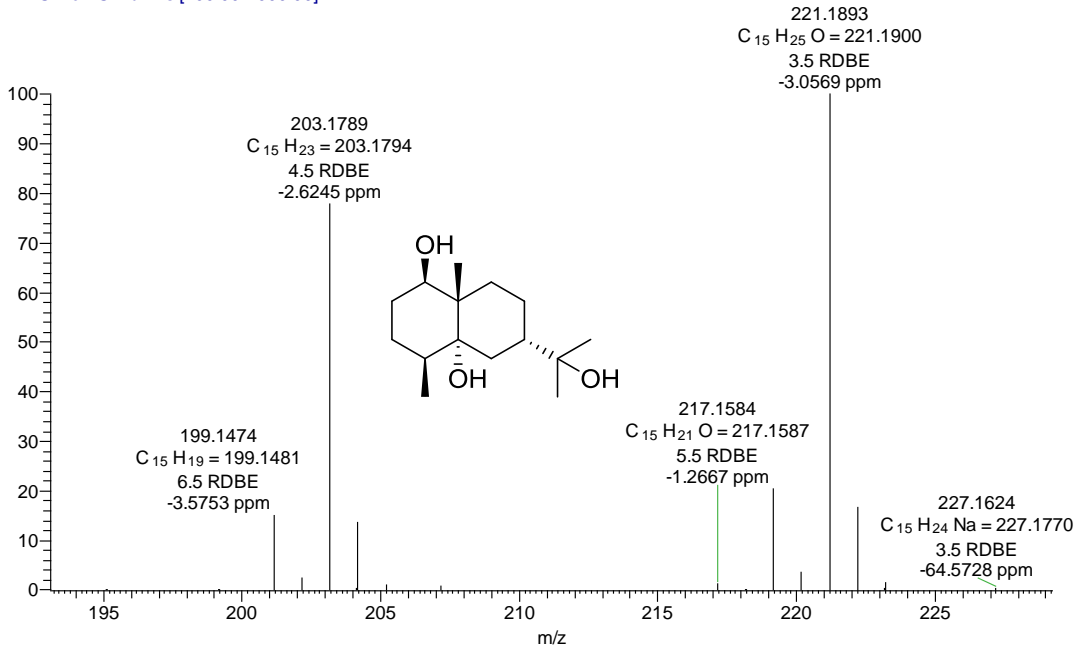

Figure S105. IR spectrum of compound 11

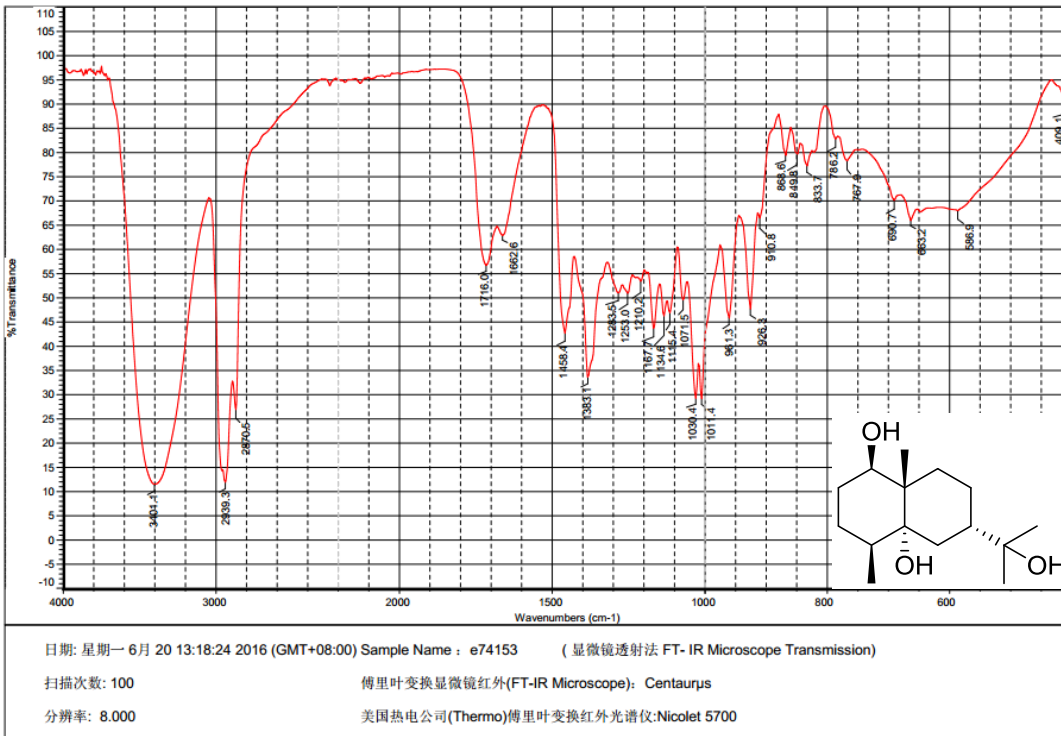

Figure S106.  $^1\text{H}$  NMR spectrum of compound **11** in  $\text{DMSO}-d_6$

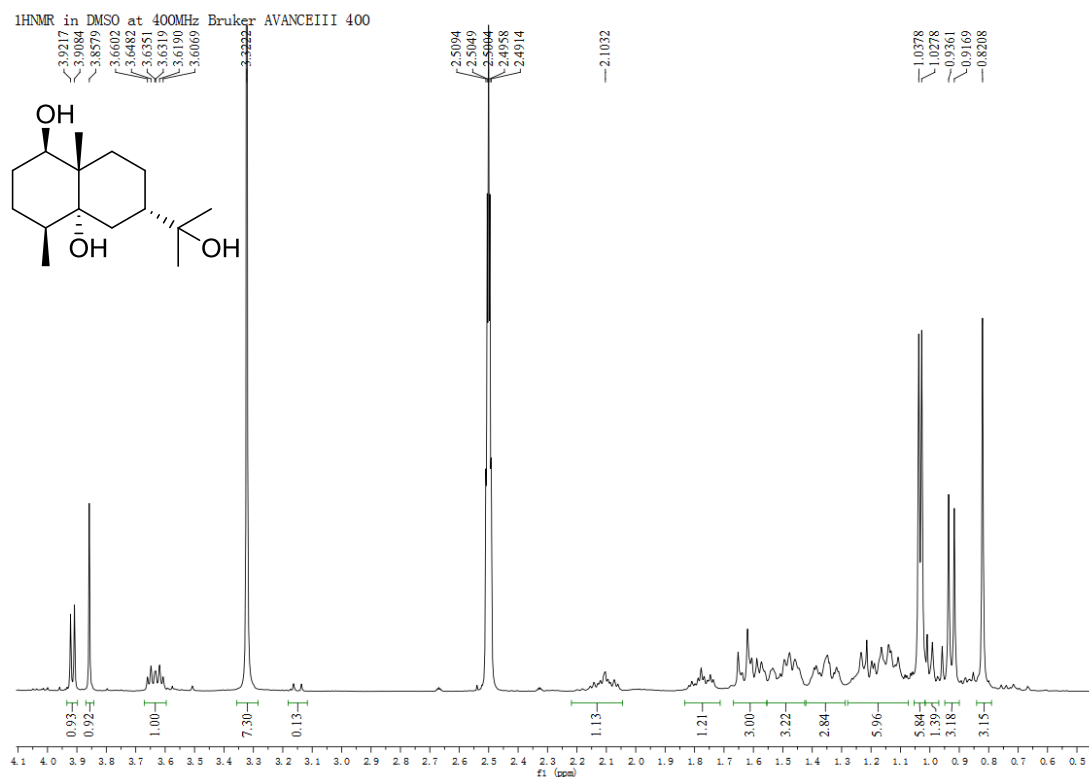

Figure S107.  $^{13}\text{C}$  NMR spectrum of compound **11** in  $\text{DMSO}-d_6$

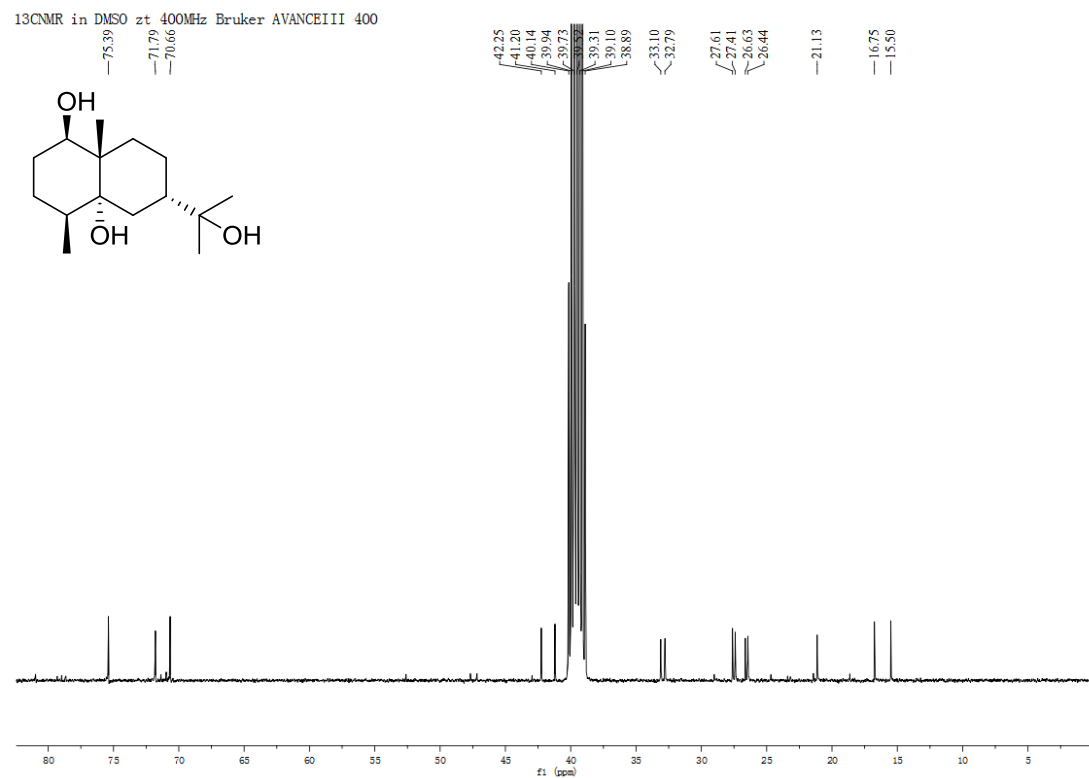



Figure S108. HMBC spectrum of compound **11** in DMSO-*d*<sub>6</sub>

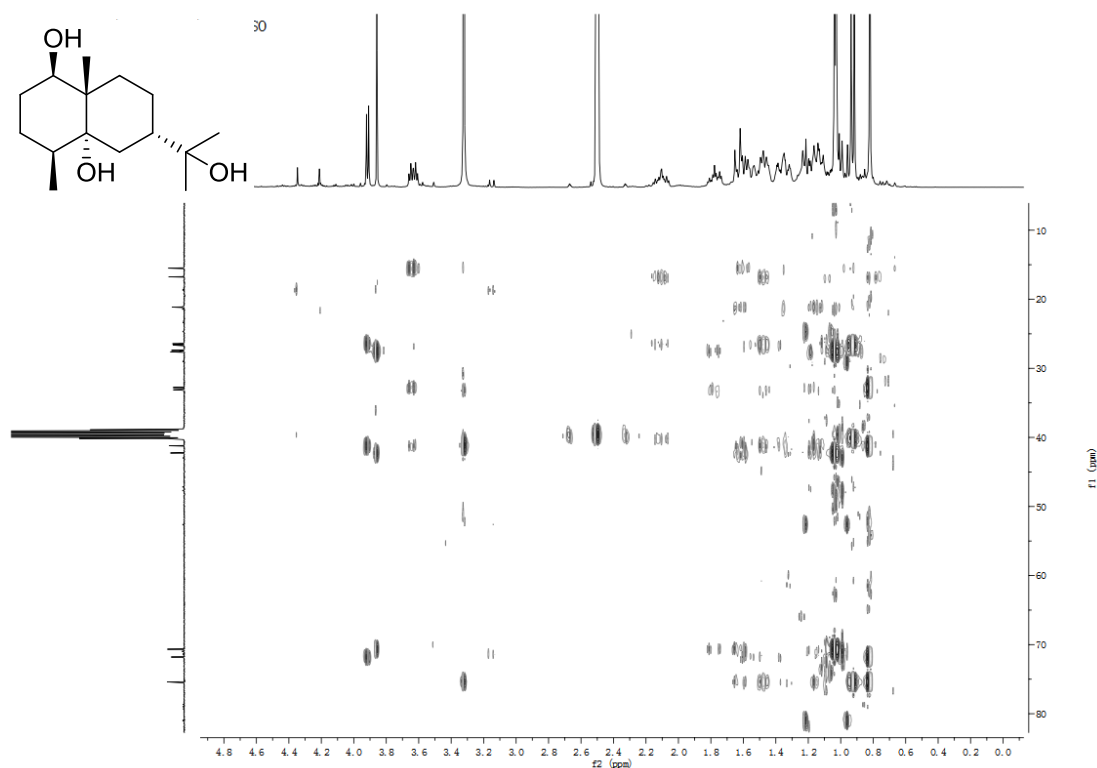

<sup>1</sup>H NMR and <sup>13</sup>C NMR data of Compounds **11**

| positio<br>n | <b>11<sup>a</sup></b> |                      | <b>11<sup>b</sup></b> |                       |
|--------------|-----------------------|----------------------|-----------------------|-----------------------|
|              | $\delta_c$ type       | $\delta_H$ (J in Hz) | $\delta_c$ type       | $\delta_H$ (J in Hz)  |
| 1            | 74.3, CH              | 3.88, dd (11.3, 4.9) | 71.8, CH              | 3.63, dt (11.3, 4.8)  |
| 2            | 26.5, CH <sub>2</sub> | 1.66, m, H $\alpha$  | 26.4, CH <sub>2</sub> | 1.57, m, H $\alpha^c$ |
|              |                       | 1.71, m, H $\beta$   |                       | 1.59, m, H $\beta^c$  |
| 3            | 26.9, CH <sub>2</sub> | 2.20, m, H $\alpha$  | 26.6, CH <sub>2</sub> | 2.10, m, H $\alpha$   |
|              |                       | 1.37, m, H $\beta$   |                       | 1.07, m, H $\beta^c$  |
| 4            | 41.4, CH              | 1.53, m              | 40.2, CH              | 1.47, m               |
| 5            | 77.6, C               |                      | 75.4, C               |                       |
| 6            | 33.8, CH <sub>2</sub> | 1.84, m, H $\alpha$  | 33.1, CH <sub>2</sub> | 1.74, m, H $\alpha^c$ |
|              |                       | 1.30, m, H $\beta$   |                       | 1.20, m, H $\beta^c$  |
| 7            | 43.3, CH              | 1.85, m              | 42.3, CH              | 1.77, m               |
| 8            | 21.7, CH <sub>2</sub> | 1.65, m, H $\alpha$  | 21.1, CH <sub>2</sub> | 1.55, m, H $\alpha^c$ |
|              |                       | 1.32, m, H $\beta$   |                       | 1.22, m, H $\beta^c$  |
| 9            | 33.3, CH <sub>2</sub> | 1.72, m, H $\alpha$  | 32.8, CH <sub>2</sub> | 1.78, m, H $\alpha$   |
|              |                       | 1.57, m, H $\beta$   |                       | 1.49, m, H $\beta^c$  |
| 10           | 42.7, C               |                      | 41.2, C               |                       |
| 11           | 72.9, C               |                      | 70.7, C               |                       |
| 12           | 28.0, CH <sub>3</sub> | 1.22, s              | 27.6, CH <sub>3</sub> | 1.04, s               |
| 13           | 27.0, CH <sub>3</sub> | 1.20, s              | 27.4, CH <sub>3</sub> | 1.02, s               |
| 14           | 15.6, CH <sub>3</sub> | 1.00, s              | 15.5, CH <sub>3</sub> | 0.82, s               |
| 15           | 16.9, CH <sub>3</sub> | 1.04, d (7.7)        | 16.8, CH <sub>3</sub> | 0.93, d (7.7)         |
| 1-OH         |                       |                      |                       | 3.92, d (5.3)         |
| 5-OH         |                       |                      |                       | 3.32, s               |
| 11-OH        |                       |                      |                       | 3.86, s               |

<sup>a</sup>Data were recorded at 400 MHz for proton and at 100 MHz for carbon in CDCl<sub>3</sub>.

<sup>b</sup>Data were recorded at 400 MHz for proton and at 100 MHz for carbon in DMSO-*d*<sub>6</sub>.

<sup>c</sup>Overlapped with other signals.

**Figure S109.** NOESY spectrum of compound **11** in DMSO-*d*<sub>6</sub>

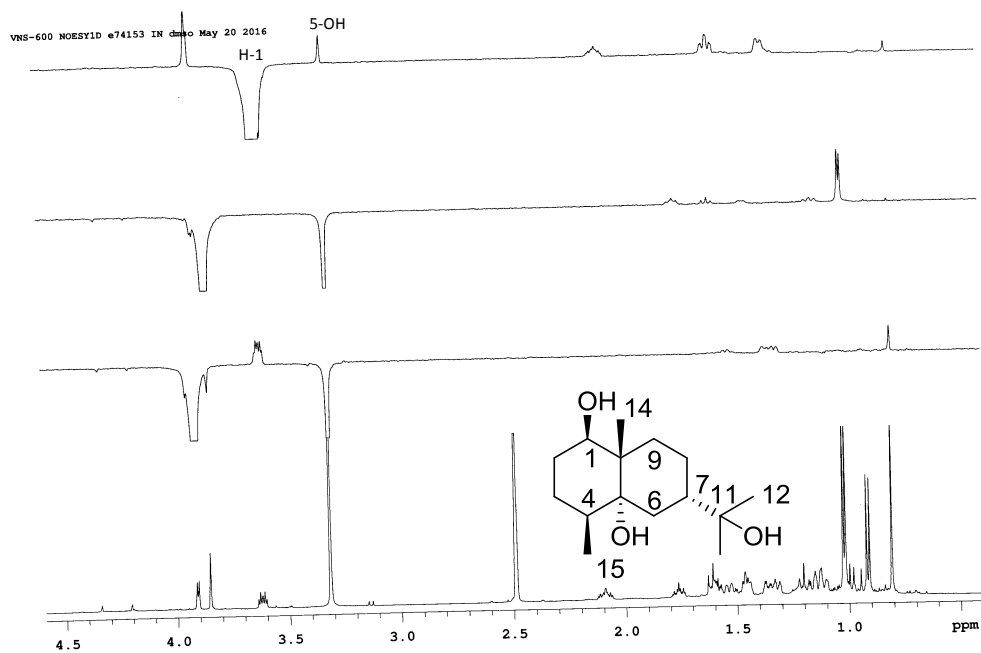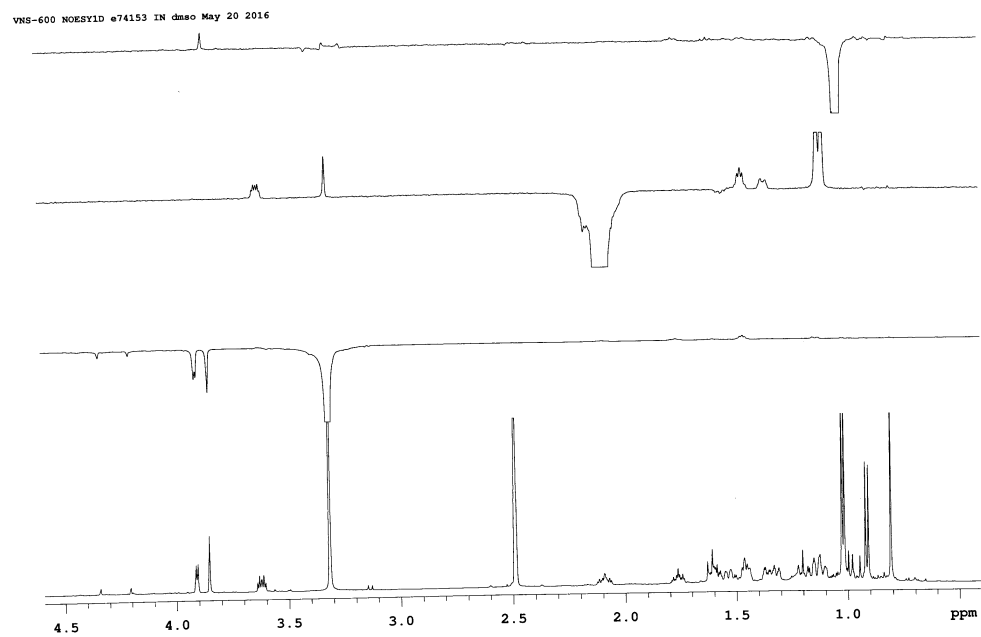

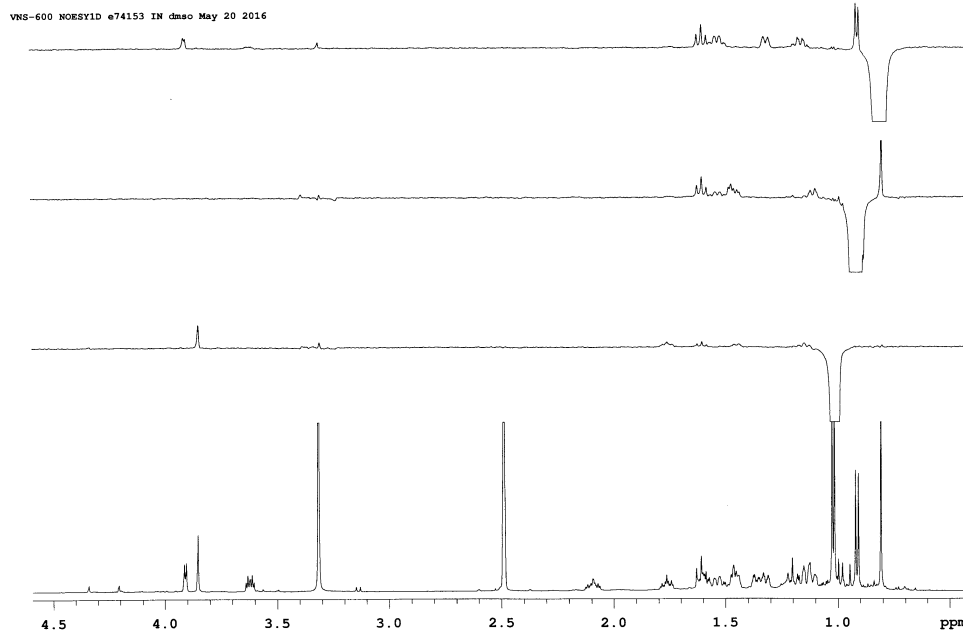

**Table S1**

Cytotoxicities of isolated compounds against five human cancer cell lines ( $IC_{50}$ ,  $\mu M$ ).

| Compounds         | $IC_{50}$ |           |         |         |        |
|-------------------|-----------|-----------|---------|---------|--------|
|                   | HCT116    | NCI-H1650 | BGC823  | Daoy    | HepG2  |
| <b>1</b>          | >50.0     | >50.0     | >50.0   | >50.0   | >50.0  |
| <b>2</b>          | >50.0     | >50.0     | >50.0   | >50.0   | >50.0  |
| <b>3</b>          | 24.5      | >50.0     | >50.0   | >50.0   | >50.0  |
| <b>4</b>          | 16.6      | >50.0     | 49.9    | 31.1    | 27.9   |
| <b>5</b>          | >50.0     | >50.0     | >50.0   | >50.0   | >50.0  |
| <b>6</b>          | >50.0     | 28.9      | >50.0   | 35.5    | >50.0  |
| <b>7</b>          | >50.0     | >50.0     | >50.0   | >50.0   | >50.0  |
| <b>8</b>          | >50.0     | >50.0     | >50.0   | >50.0   | >50.0  |
| <b>9</b>          | 12.2      | >50.0     | >50.0   | >50.0   | >50.0  |
| <b>10</b>         | >50.0     | >50.0     | >50.0   | >50.0   | >50.0  |
| <b>11</b>         | >50.0     | >50.0     | >50.0   | >50.0   | >50.0  |
| <b>12</b>         | >50.0     | >50.0     | >50.0   | >50.0   | >50.0  |
| <b>13</b>         | >50.0     | >50.0     | >50.0   | >50.0   | >50.0  |
| <b>14</b>         | >50.0     | >50.0     | >50.0   | >50.0   | >50.0  |
| <b>Paclitaxel</b> | 0.000809  | 0.945     | 0.00177 | 0.00933 | 0.0249 |

**Table S2**Anti-HIV-1 activity of isolated compounds (IC<sub>50</sub>, μM).

| Compounds        | HIV-1 |
|------------------|-------|
| <b>1</b>         | NA    |
| <b>2</b>         | NA    |
| <b>3</b>         | NA    |
| <b>4</b>         | 37.9  |
| <b>5</b>         | NA    |
| <b>6</b>         | NA    |
| <b>7</b>         | NA    |
| <b>8</b>         | NA    |
| <b>9</b>         | NA    |
| <b>10</b>        | NA    |
| <b>11</b>        | NA    |
| <b>12</b>        | NA    |
| <b>13</b>        | NA    |
| <b>14</b>        | NA    |
| <b>Efavirenz</b> | 0.002 |

NA=No activity
